# Supplementary material for: Domino aza/oxa-hetero-Diels–Alder reaction for construction of novel spiro[pyrido[3′,2′:5,6]pyrano[2,3-d]pyrimidine-7,5′-pyrimidine]
Source: Royal Society of Chemistry journal article supplement (doi:10.1039/c8qo00784e), 2018-01-01

**Domino aza/oxa-hetero-Diels-Alder reaction for construction of novel  
spiro[pyrido[3',2':5,6]pyrano[2,3-*d*]pyrimidine-7,5'-pyrimidine]**

Wen-Juan Yan, Qiu Sun, Jing Sun, Chao-Guo Yan\*

**Supporting Information**

|                                                                                             |             |
|---------------------------------------------------------------------------------------------|-------------|
| <b>Experimental section</b>                                                                 | <b>2</b>    |
| <b>Characterization data and copy of <sup>1</sup>H, <sup>13</sup>C NMR and HRMS spectra</b> | <b>3-82</b> |

## Experimental section

### General procedure for the synthesis of polycyclic compounds 3-5 via annulation reaction:

Under N<sub>2</sub> atmosphere, a mixture of  $\alpha,\beta$ -unsaturated *N*-arylaldehyde (0.5 mmol), 2-arylidene-1,3-dimethylbarbituric acid (1.5 mmol) and CH<sub>2</sub>Cl<sub>2</sub> (10.0 mL) was added in a Schlenk tube. The mixture was stirred at room temperature for six hours. The solvent was removed by rotatory evaporation at reduced pressure. The residue was subjected with silicon column chromatography with mixed petroleum ether and ethyl acetate (V/V = 2:1) as eluent to give pure product for analysis.

***rel*-(5S,5aS,6S,8R,9aS)-6-(4-fluorophenyl)-9-(4-methoxyphenyl)-1,1',3,3'-tetramethyl-5,8-diphenyl-1,5,5a,8,9,9a-hexahydro-2H,2'H,6H-spiro[pyrido[3',2':5,6]pyrano[2,3-d]pyrimidine-7,5'-pyrimidine]-2,2',4,4',6'-pentaone (3a):**

yellow solid, 80%, m.p.152-154 °C; <sup>1</sup>H NMR (400 MHz, CDCl<sub>3</sub>) δ: 7.40 (brs, 1H, ArH), 7.32 (t, *J* = 14.4 Hz, 2H, ArH), 7.26-7.23 (m, 1H, ArH), 7.14-7.08 (m, 2H, ArH), 7.06-6.98 (m, 7H, ArH), 6.96-6.88 (m, 4H, ArH), 6.65 (d, *J* = 9.2 Hz, 2H, ArH), 5.70 (d, *J* = 2.4 Hz, 1H, CH), 5.52 (s, 1H, CH), 4.05-4.02 (m, 1H, CH), 3.88 (d, *J* = 13.2 Hz, 1H, CH), 3.78 (s, 1H, CH), 3.67 (s, 3H, OCH<sub>3</sub>), 3.49 (s, 3H, NCH<sub>3</sub>), 3.24 (s, 3H, NCH<sub>3</sub>), 2.94 (s, 3H, NCH<sub>3</sub>), 2.80 (s, 3H, NCH<sub>3</sub>); <sup>13</sup>C NMR (100 MHz, CDCl<sub>3</sub>) δ: 169.9, 166.7, 162.1, 157.0, 155.9, 151.2, 149.2, 143.5, 139.7, 134.3, 131.4, 128.8, 128.6, 128.2, 128.1, 127.9, 127.7, 127.1, 126.9, 113.8, 94.6, 84.9, 64.8, 62.5, 55.1, 46.2, 40.0, 37.3, 28.6, 28.4, 27.9, 27.8; IR(KBr) ν: 3032, 2958, 1687, 1642, 1487, 1381, 1272, 1166, 1016, 914, 829, 781, 703, 643 cm<sup>-1</sup>; MS (*m/z*): HRMS (ESI) Calcd. for C<sub>42</sub>H<sub>39</sub>FN<sub>5</sub>O<sub>7</sub> ([M+H]<sup>+</sup>): 744.2834, found: 744.2799.

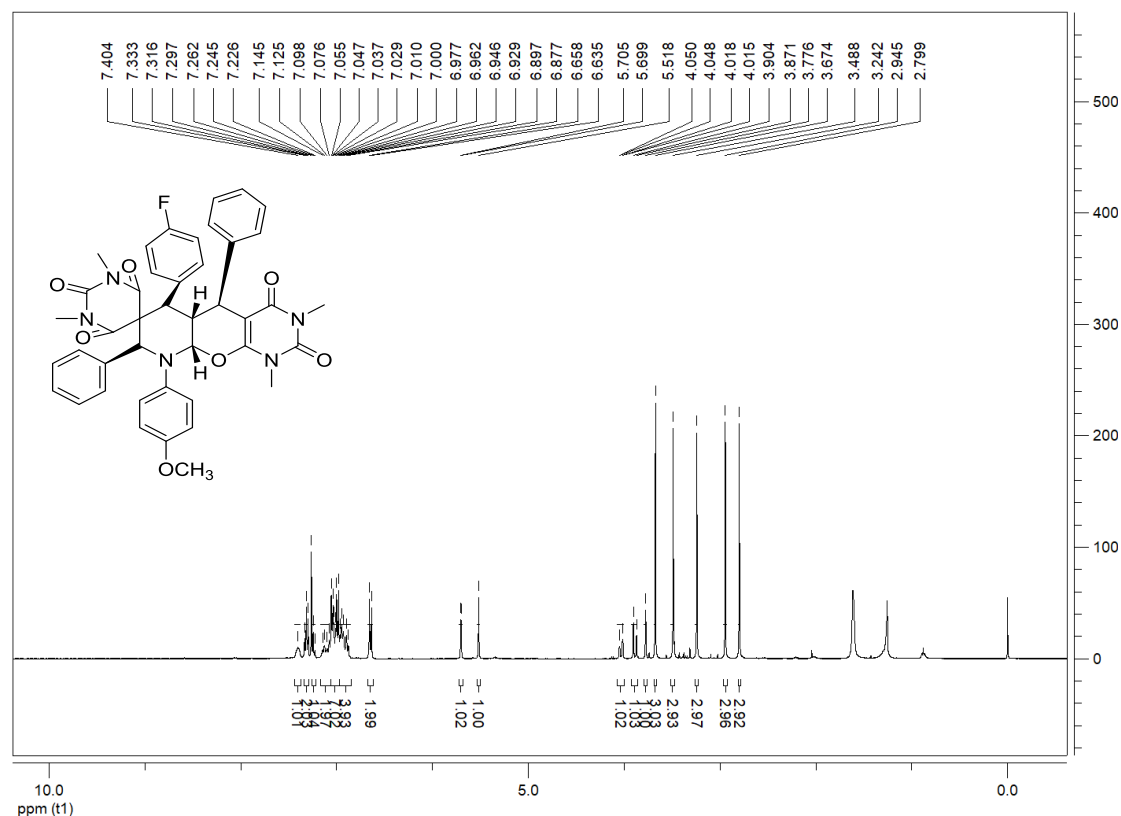

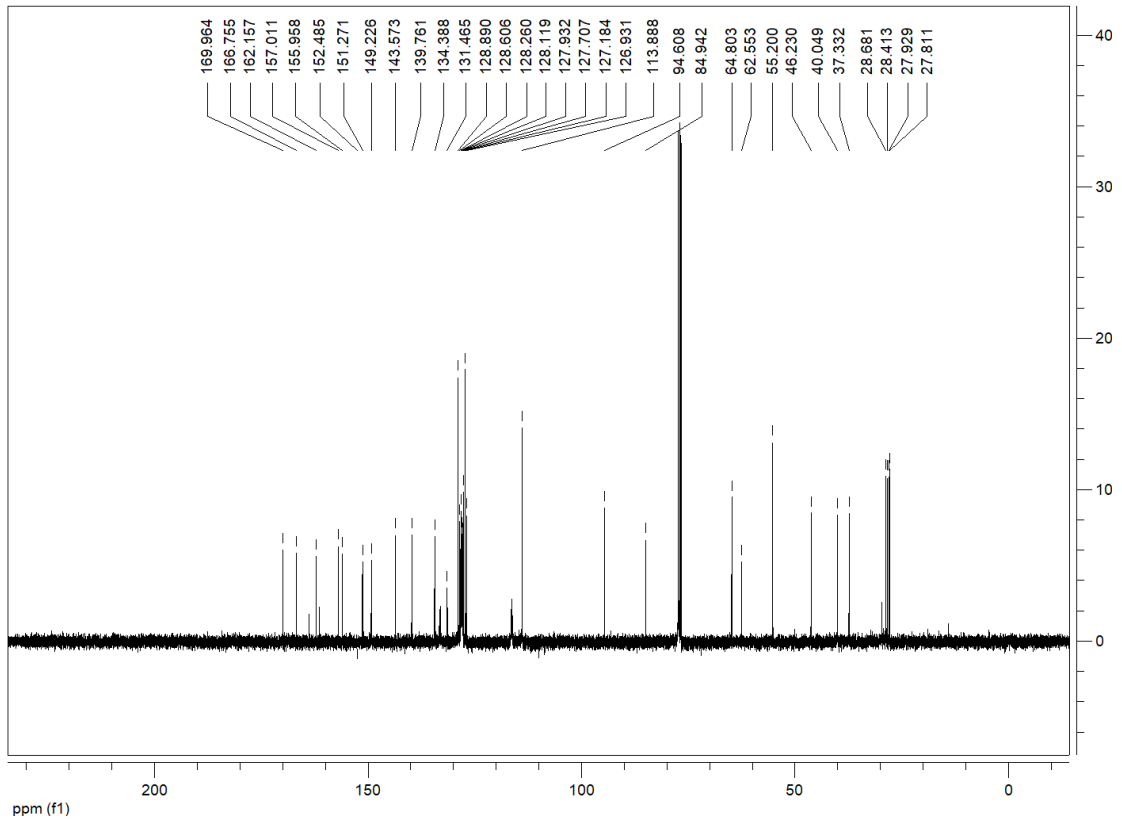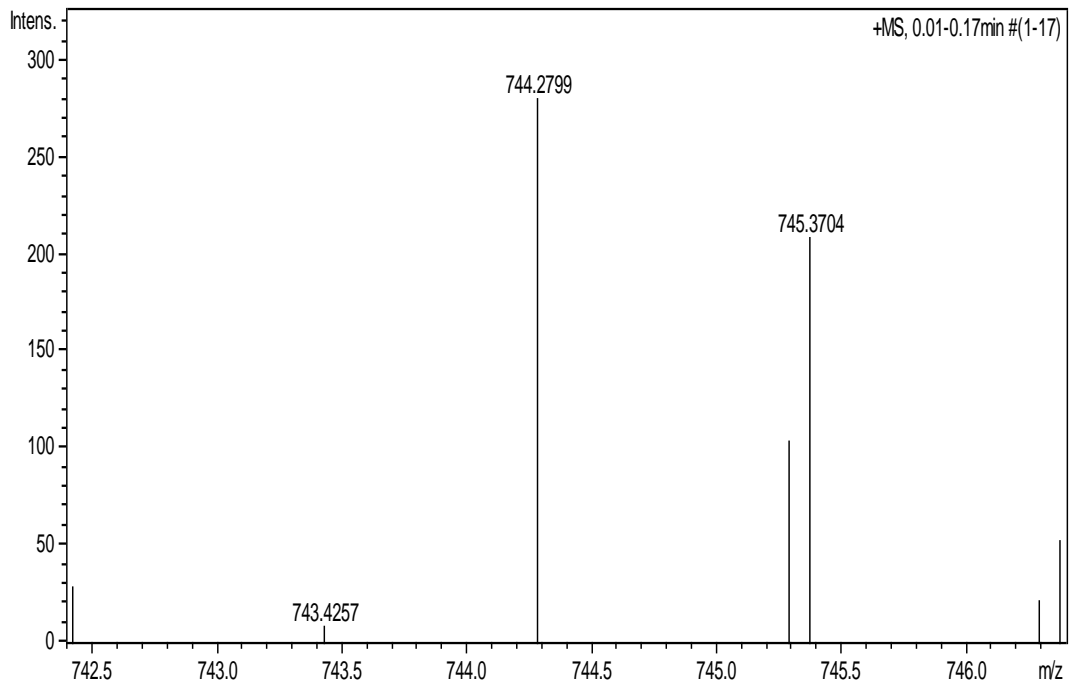

***rel*-(5*S*,5*aS*,6*S*,8*R*,9*aS*)-6-(4-fluorophenyl)-9-(4-methoxyphenyl)-1,1',3,3'-tetramethyl-5,8-di-*p*-tolyl-1,5,5*a*,8,9,9*a*-hexahydro-2*H*,2'*H*,6*H*-spiro[pyrido[3',2':5,6]pyrano[2,3-*d*]pyrimidine-7,5'-pyrimidine]-2,2',4,4',6'-pentaone (3b):**

Yellow solid, 73%, m.p.150-152°C; <sup>1</sup>H NMR (400 MHz, CDCl<sub>3</sub>) δ: 7.38 (brs, 1H, ArH), 7.10 (d, *J* = 7.6 Hz, 3H, ArH), 6.98 (d, *J* = 8.8 Hz, 3H, ArH), 6.92 (d, *J* = 8.0 Hz, 3H, ArH), 6.86-6.80 (m, 2H, ArH), 6.75 (s, 2H, ArH), 6.65 (d, *J* = 8.8 Hz, 2H, ArH), 5.70 (d, *J* = 3.2 Hz, 1H, CH), 5.48 (s, 1H, CH), 4.99 (d, *J* = 13.2 Hz, 1H, CH), 3.86 (d, *J* = 13.2 Hz, 1H, CH), 3.73 (s, 1H, CH), 3.68 (s, 3H, OCH<sub>3</sub>), 3.48 (s, 3H, NCH<sub>3</sub>), 3.23 (s, 3H, NCH<sub>3</sub>), 2.94 (s, 3H, NCH<sub>3</sub>), 2.80 (s, 3H, NCH<sub>3</sub>); <sup>13</sup>C NMR (100 MHz, CDCl<sub>3</sub>) δ: 170.0, 166.7, 162.1, 161.3, 156.9, 155.8, 151.2, 149.3, 140.6, 139.9, 138.2, 136.4, 131.5, 131.5, 131.2, 129.5, 128.9, 128.4, 128.2, 128.0, 127.7, 127.0, 116.2, 113.8, 94.7, 85.1, 64.4, 62.5, 55.1, 46.2, 40.0, 36.9, 28.6, 28.3, 27.8, 27.8, 21.0, 20.9; IR(KBr) ν: 2963, 1651, 1505, 1430, 1379, 1241, 1168, 909, 823, 762 cm<sup>-1</sup>; MS (*m/z*): HRMS (ESI) Calcd. for C<sub>44</sub>H<sub>43</sub>FN<sub>5</sub>O<sub>7</sub>([M+H]<sup>+</sup>): 772.3147, found: 772.3129.

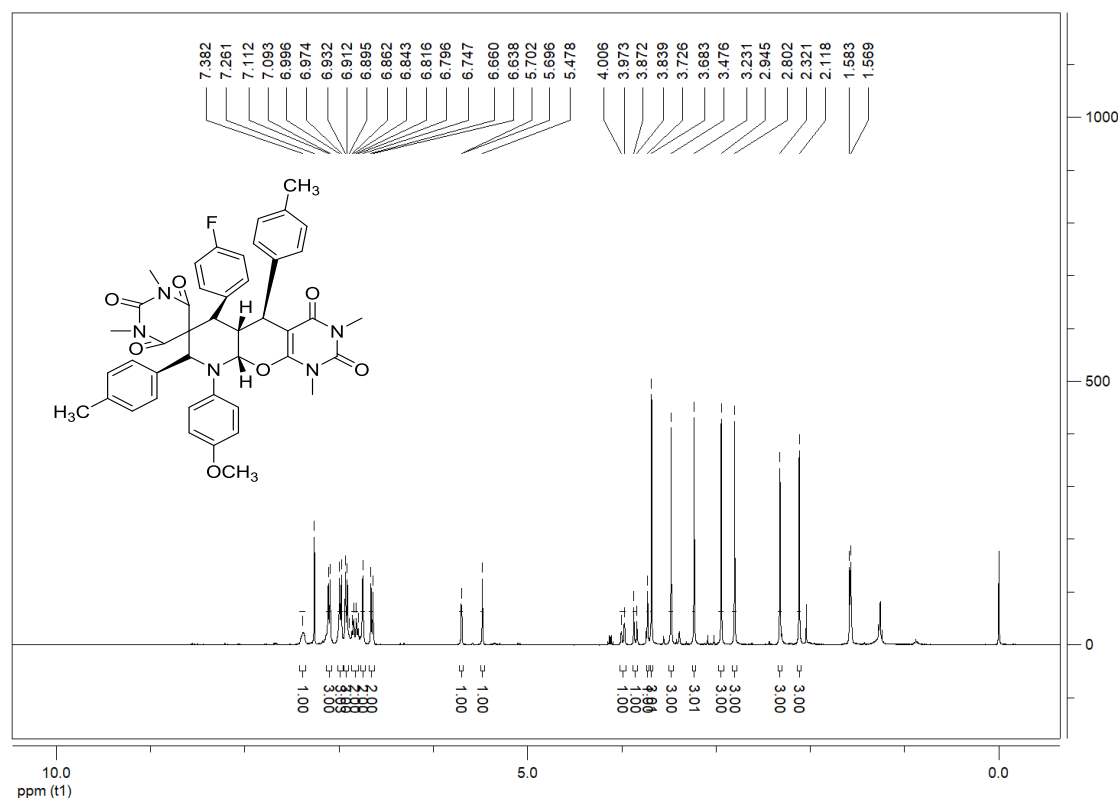

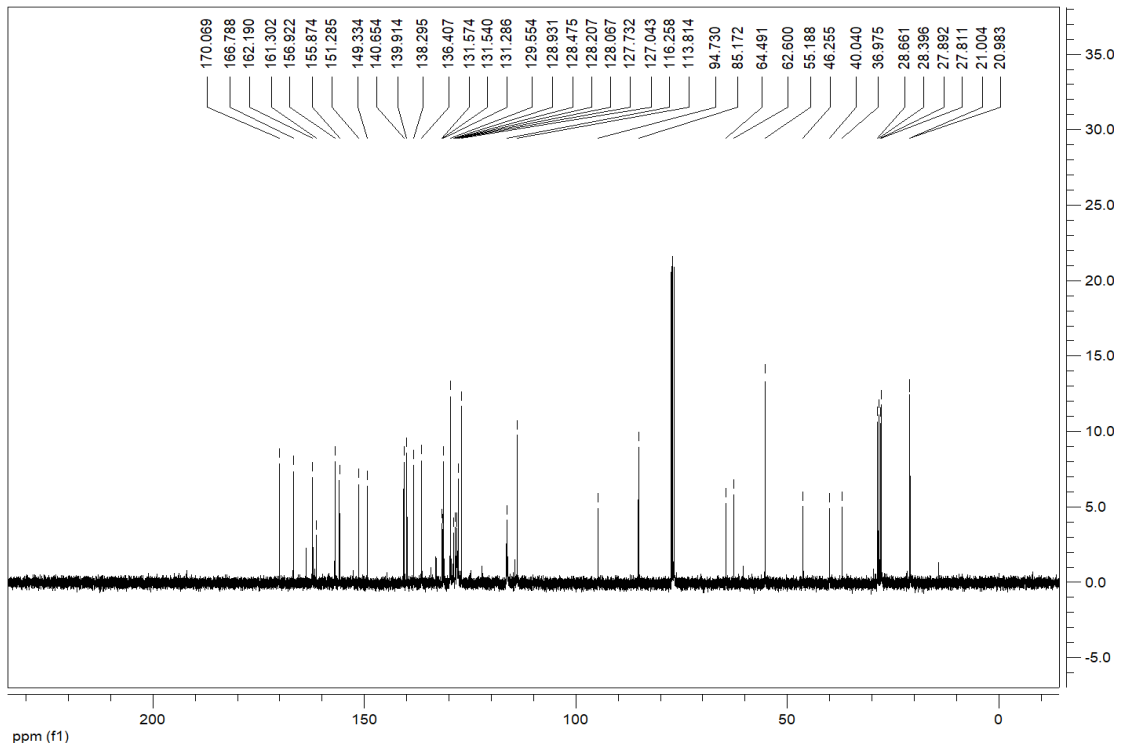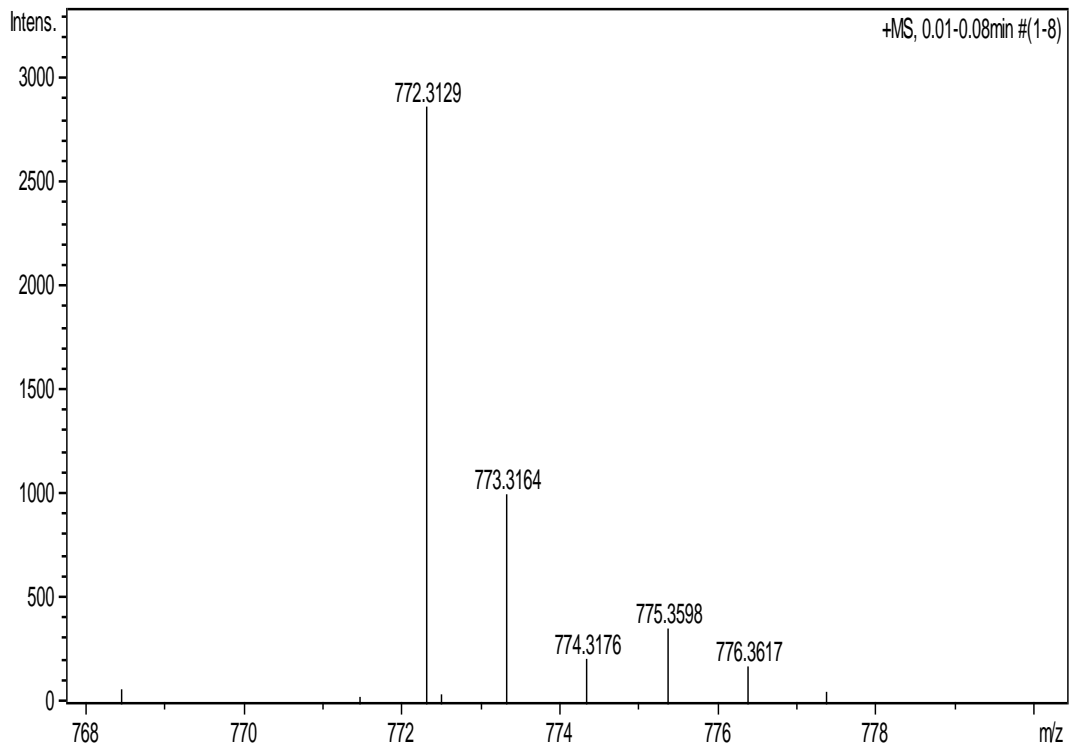



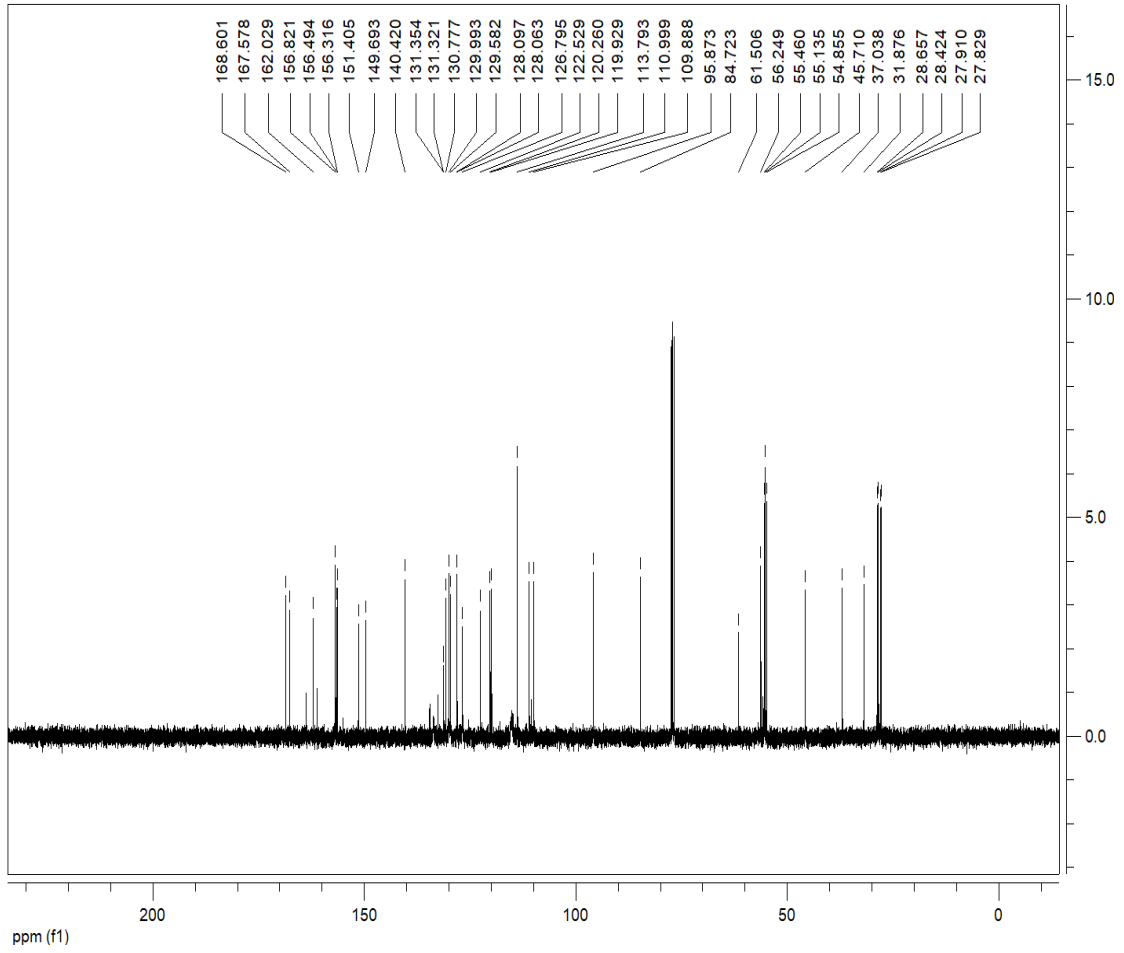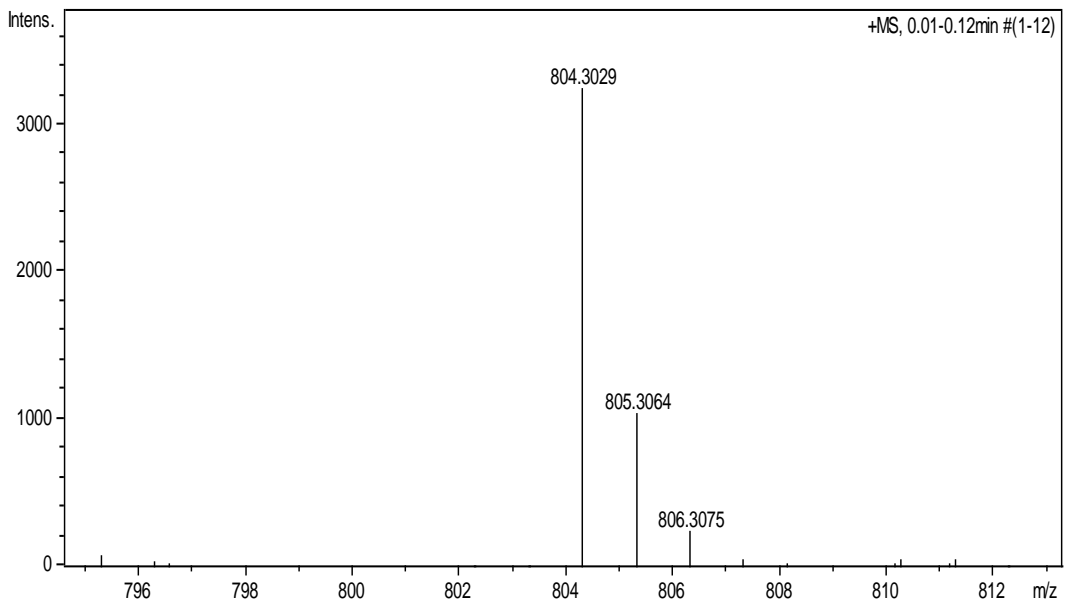



***rel*-(5*S*,5*aS*,6*S*,8*R*,9*aS*)-6-(4-fluorophenyl)-5,8,9-tris(4-methoxyphenyl)-1,1',3,3'-tetramethyl-1,5,5*a*,8,9,9*a*-hexahydro-2*H*,2'*H*,6*H*-spiro[pyrido[3',2':5,6]pyrano[2,3-*d*]pyrimidine-7,5'-pyrimidine]-2,2',4,4',6'-pentaone (3d):**

Yellow solid, 43%, m.p.112-114°C; <sup>1</sup>H NMR (400 MHz, CDCl<sub>3</sub>) δ: 7.37 (brs, 1H, ArH), 7.12 (brs, 1H, ArH), 6.99-6.94 (m, 6H, ArH), 6.86-6.79 (m, 4H, ArH), 6.65 (d, *J* = 8.8 Hz, 2H, ArH), 6.58-6.55 (m, 1H, ArH), 6.49-6.47 (m, 1H, ArH), 5.68 (d, *J* = 2.4 Hz, 1H, CH), 5.47 (s, 1H, CH), 3.98-3.94 (m, 1H, CH), 3.86 (d, *J* = 8.0 Hz, 1H, CH), 3.79 (s, 3H, OCH<sub>3</sub>), 3.72 (s, 1H, CH), 3.67 (s, 3H, OCH<sub>3</sub>), 3.63 (s, 3H, OCH<sub>3</sub>), 3.48 (s, 3H, NCH<sub>3</sub>), 3.24 (s, 3H, NCH<sub>3</sub>), 2.95 (s, 3H, NCH<sub>3</sub>), 2.84 (s, 3H, NCH<sub>3</sub>); <sup>13</sup>C NMR (100 MHz, CDCl<sub>3</sub>) δ: 170.1, 166.8, 162.1, 159.2, 158.4, 156.9, 155.8, 151.2, 149.3, 139.8, 137.9, 135.6, 129.5, 129.4, 128.1, 127.8, 126.1, 114.3, 114.2, 113.9, 113.9, 113.8, 94.7, 85.1, 64.1, 62.6, 55.5, 55.2, 55.1, 54.9, 46.2, 40.1, 36.5, 28.6, 28.4, 27.8, 27.8; IR(KBr) ν: 2953, 2841, 1646, 1506, 1456, 1380, 1251, 1170, 1030, 910, 831, 763, 672, 631 cm<sup>-1</sup>; MS (*m/z*): HRMS (ESI) Calcd. for C<sub>44</sub>H<sub>43</sub>FN<sub>5</sub>O<sub>9</sub>([M+H]<sup>+</sup>): 804.3045, found: 804.3020.

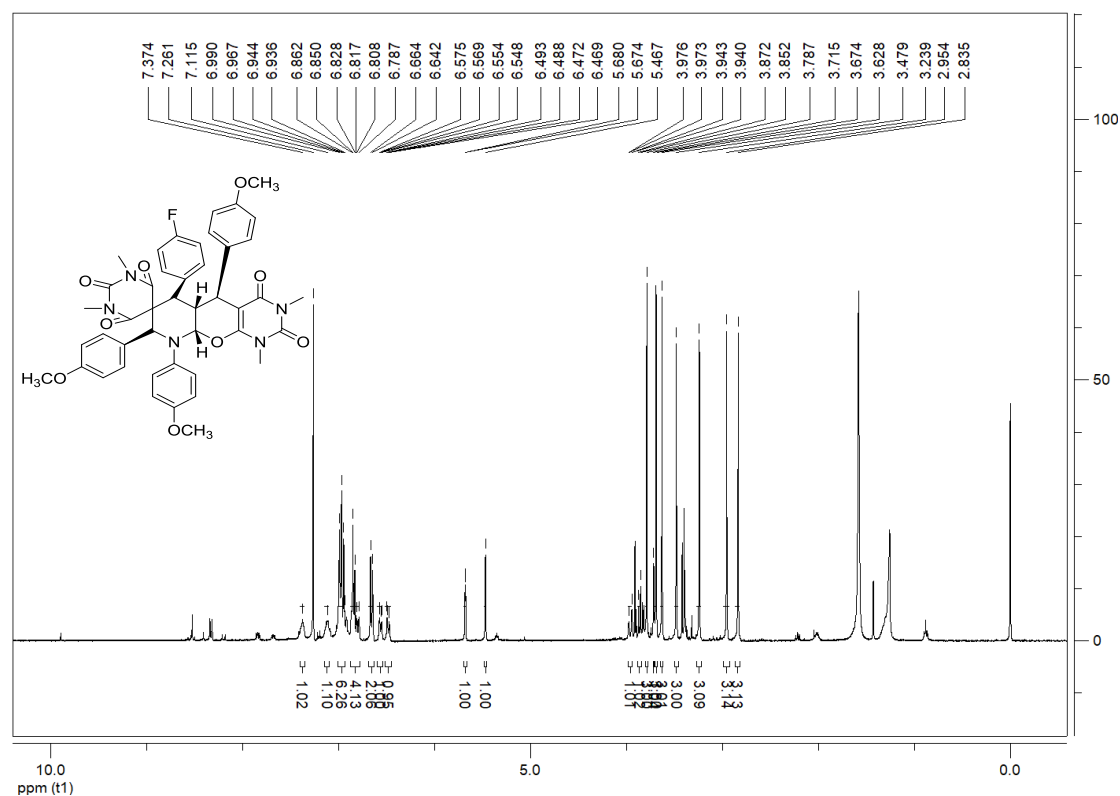

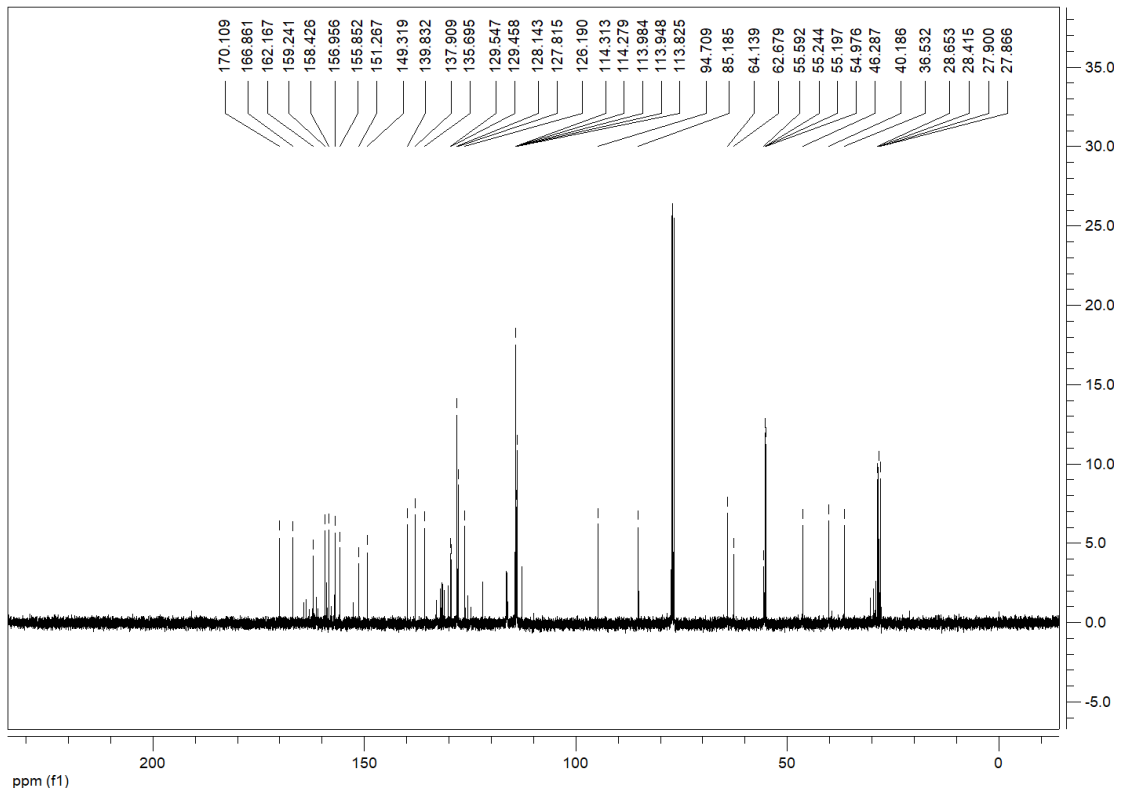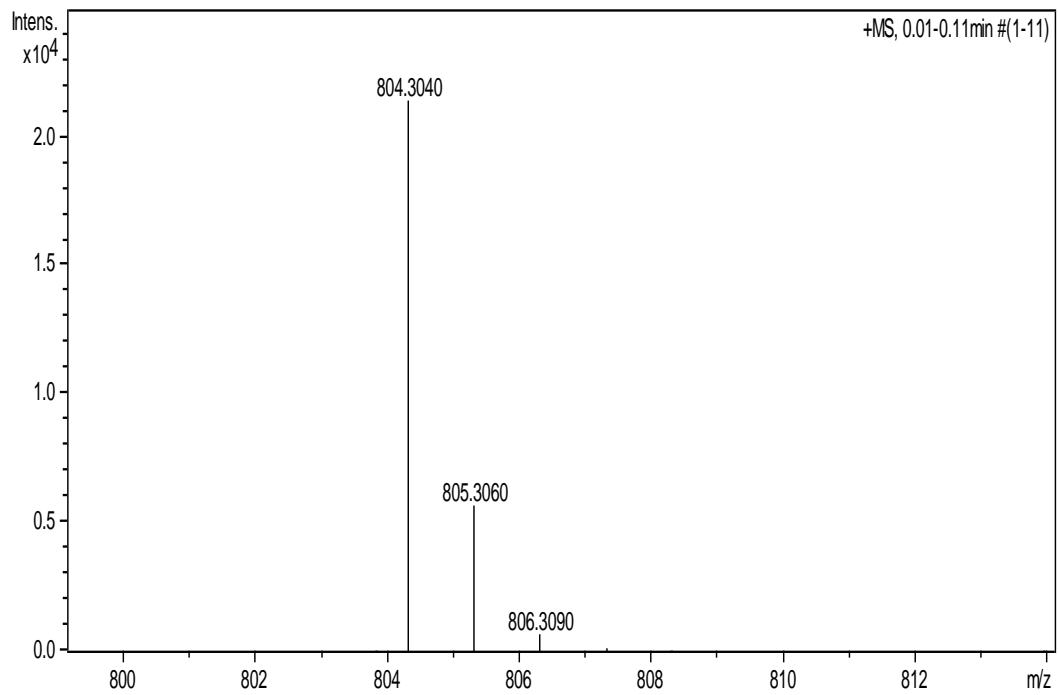

***rel*-(5*S*,5*aS*,6*S*,8*R*,9*aS*)-5,8-bis(3-chlorophenyl)-6-(4-fluorophenyl)-9-(4-methoxyphenyl)-1,1,3,3'-tetramethyl-1,5,5*a*,8,9,9*a*-hexahydro-2*H*,2'*H*,6*H*-spiro[pyrido[3',2':5,6]pyrano[2,3-*d*]pyrimidine-7,5'-pyrimidine]-2,2',4,4',6'-pentaone (3e):**

white solid, 93%, m.p.128-130°C; <sup>1</sup>H NMR (400 MHz, CDCl<sub>3</sub>) δ: 7.37 (brs, 1H, ArH), 7.26-7.22 (m, 2H, ArH), 7.15 (brs, 1H, ArH), 7.02-6.92 (m, 9H, ArH), 6.82 (t, *J* = 7.6 Hz, 1H, ArH), 6.70 (d, *J* = 8.0 Hz, 2H, ArH), 5.61 (d, *J* = 2.4 Hz, 1H, CH), 5.49 (d, *J* = 13.6 Hz, 1H, CH), 4.04-3.96 (m, 1H, CH), 3.88-3.83 (m, 1H, CH), 3.73 (s, 1H, CH), 3.70 (s, 3H, OCH<sub>3</sub>), 3.50 (s, 3H, NCH<sub>3</sub>), 3.24 (s, 3H, NCH<sub>3</sub>), 3.01-2.82 (s, s, s, s, 6H, 2NCH<sub>3</sub>); <sup>13</sup>C NMR (100 MHz, CDCl<sub>3</sub>) δ: 169.6, 169.5, 166.6, 166.5, 163.8, 162.0, 161.4, 157.3, 157.2, 156.0, 151.1, 149.0, 145.6, 145.6, 139.2, 139.0, 136.6, 136.5, 134.7, 134.5, 133.8, 133.1, 133.1, 133.1, 133.1, 133.0, 131.0, 130.9, 130.2, 129.4, 129.2, 129.0, 128.7, 128.5, 128.3, 128.2, 127.8, 127.8, 127.7, 127.7, 127.6, 127.5, 127.5, 127.5, 127.4, 127.3, 127.2, 126.4, 126.2, 125.4, 116.7, 116.7, 116.6, 116.5, 116.4, 116.4, 116.3, 116.3, 116.2, 116.2, 114.1, 94.1, 94.1, 84.3, 64.3, 64.2, 62.2, 55.2, 46.1, 46.0, 40.0, 39.9, 37.1, 28.7, 28.4, 27.9; IR(KBr) ν: 2957, 1685, 1646, 1503, 1379, 1242, 1169, 1029, 900, 838, 788, 700, 643 cm<sup>-1</sup>; MS (*m/z*): HRMS (ESI) Calcd. for C<sub>42</sub>H<sub>37</sub>Cl<sub>2</sub>FN<sub>5</sub>O<sub>7</sub> ([M+H]<sup>+</sup>): 812.2054, found: 812.2058.

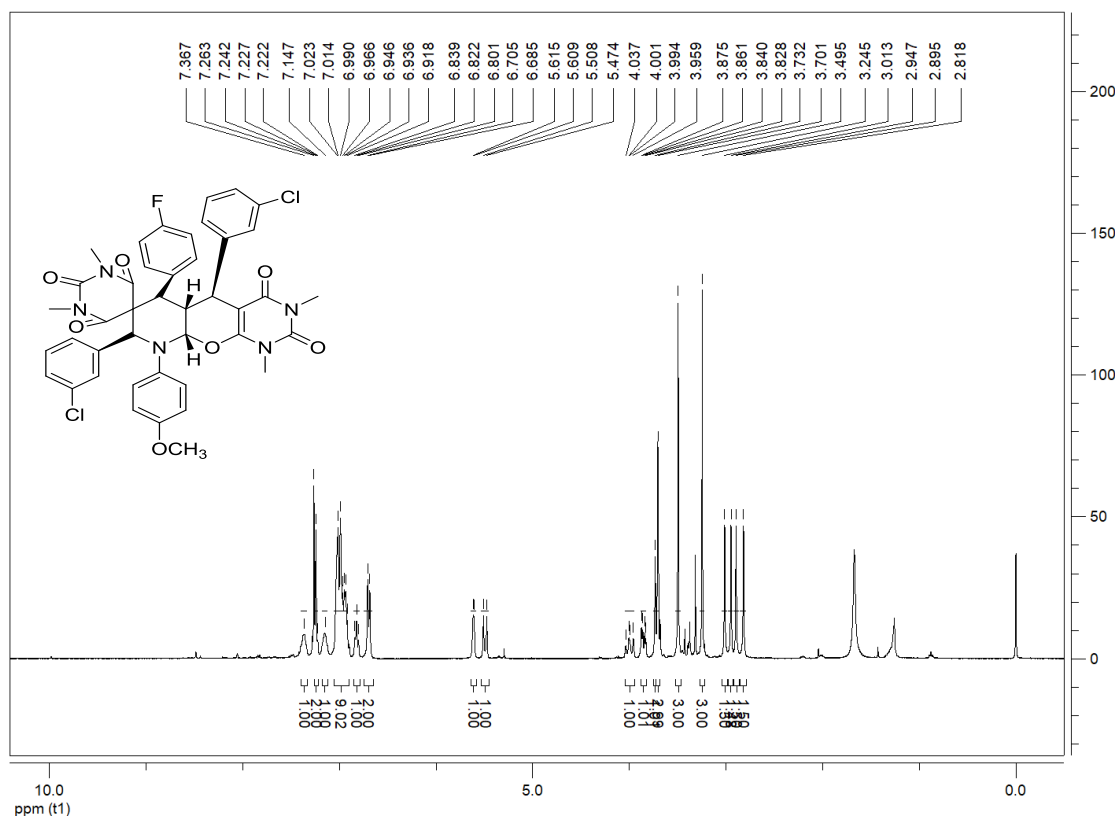

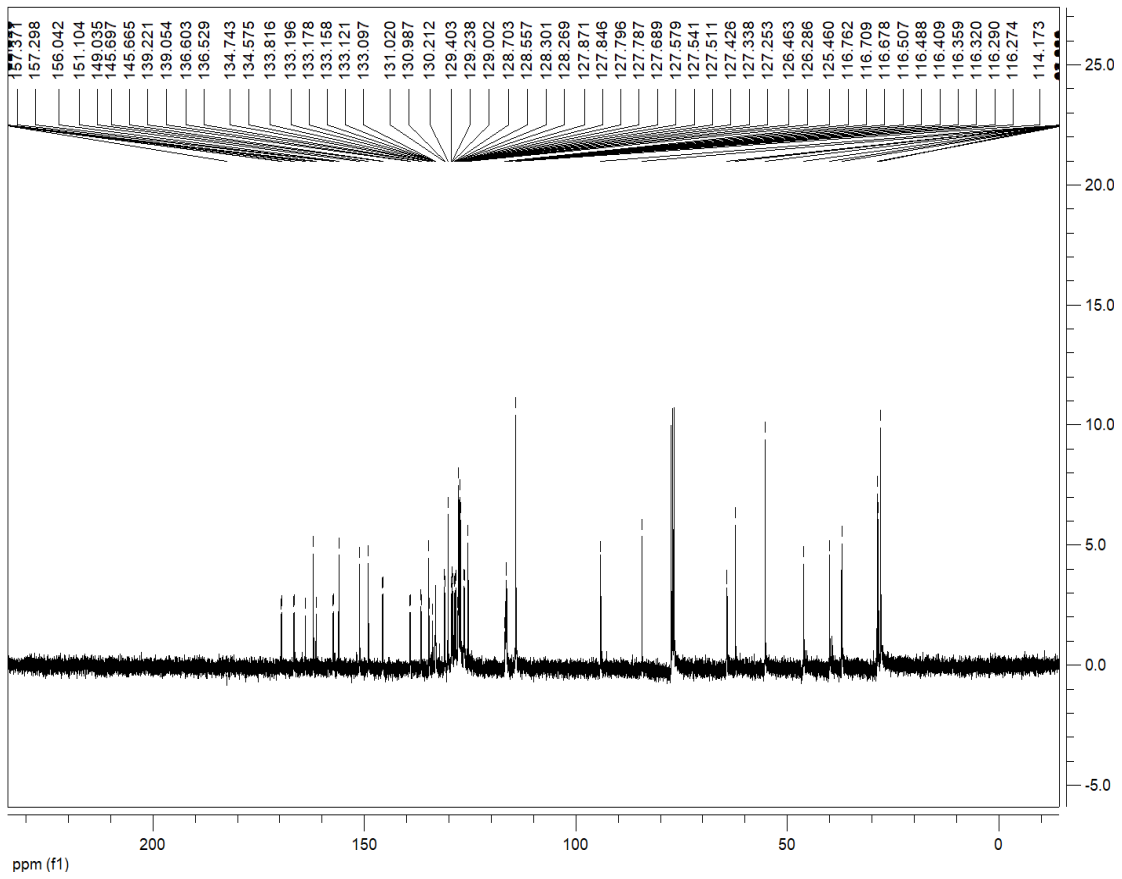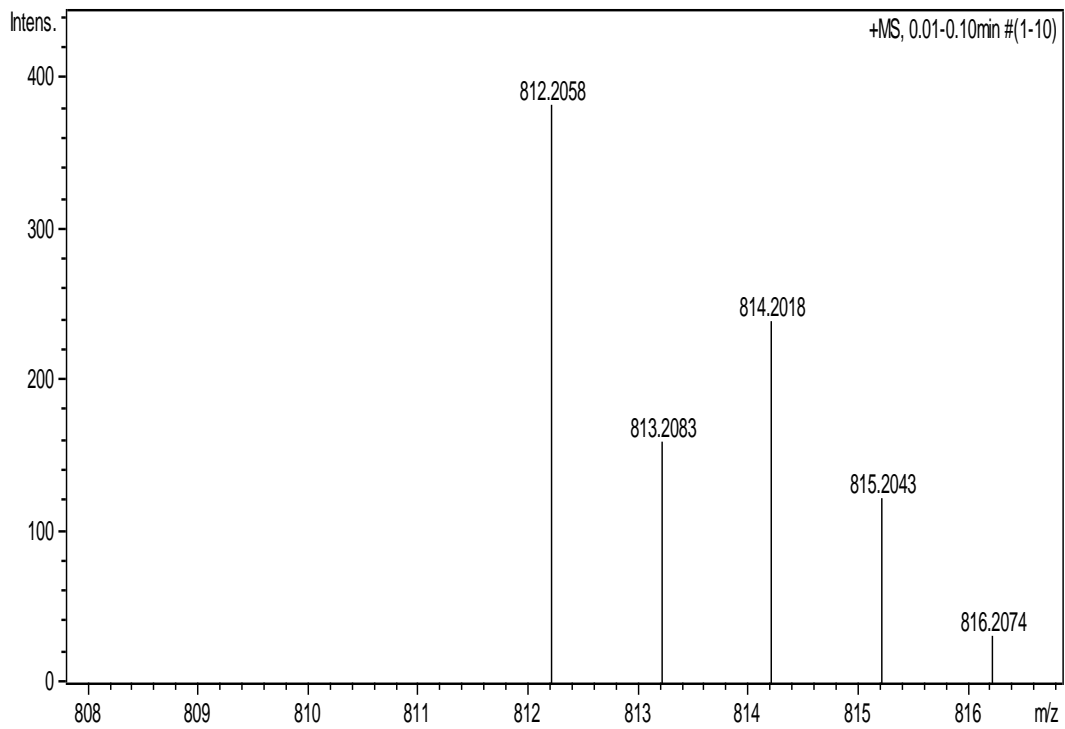



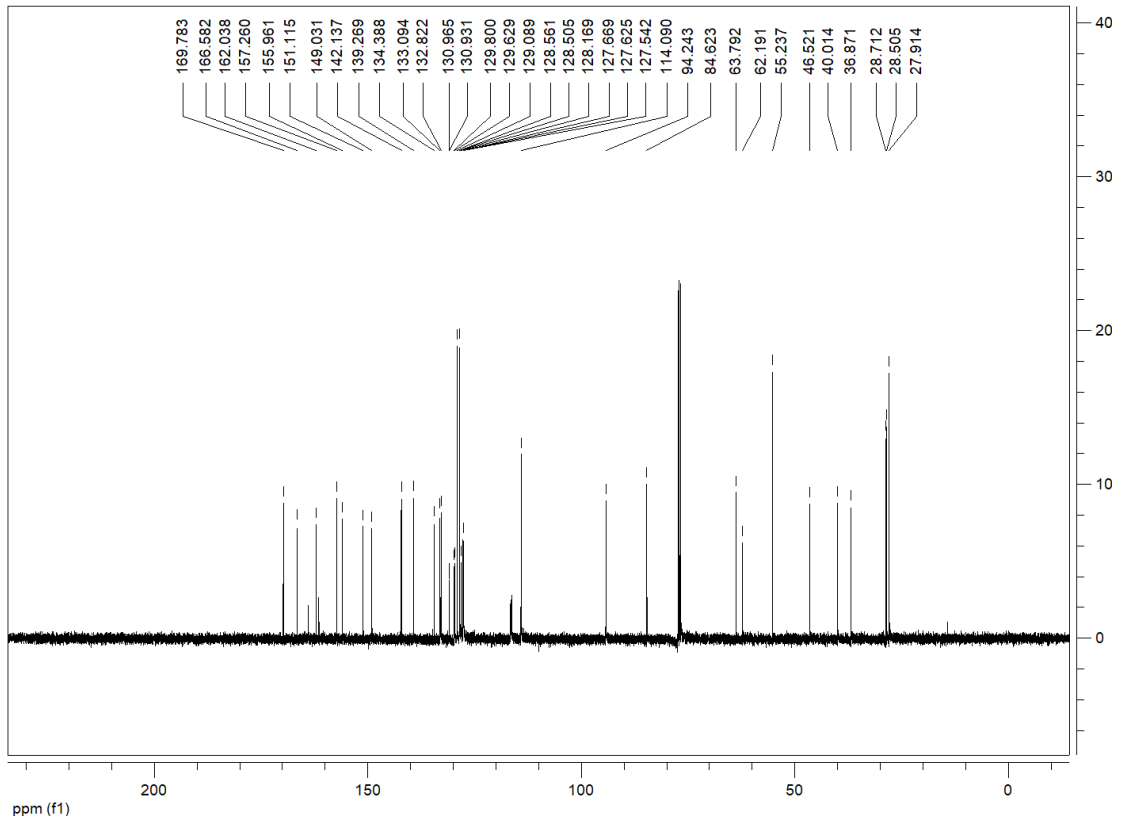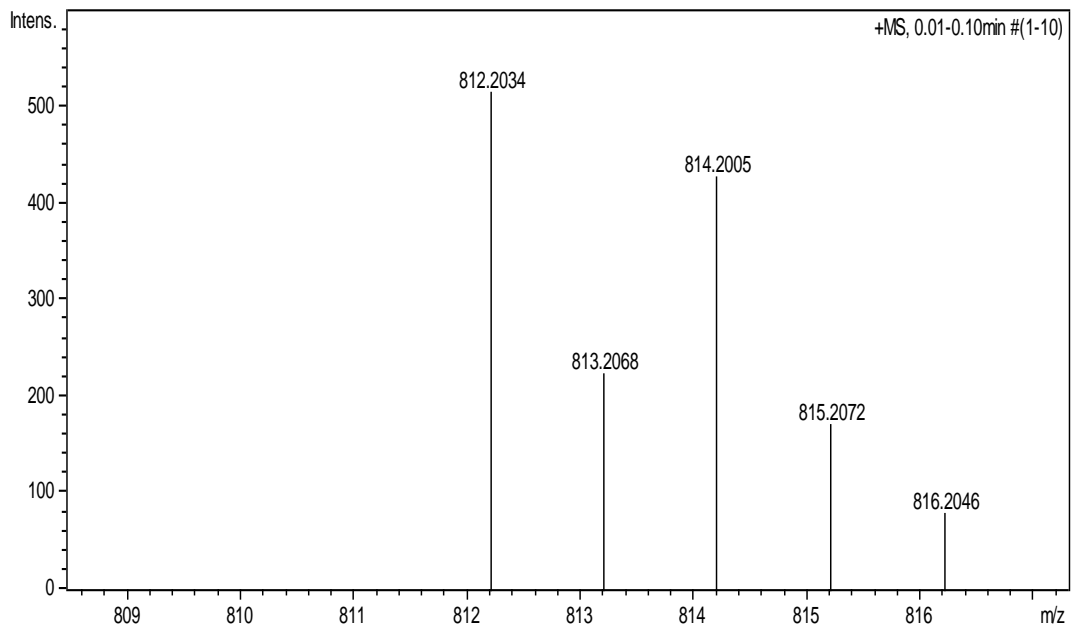

***rel*-(5S,5aS,6S,8R,9aS)-5,8-bis(4-bromophenyl)-6-(4-fluorophenyl)-9-(4-methoxyphenyl)-1,1',3,3'-tetramethyl-1,5,5a,8,9,9a-hexahydro-2H,2'H,6H-spiro[pyrido[3',2':5,6]pyrano[2,3-d]pyrimidine-7,5'-pyrimidine]-2,2',4,4',6'-pentaone (3g):**

white solid, 94%, m.p.175-177°C; <sup>1</sup>H NMR (400 MHz, CDCl<sub>3</sub>) δ: 7.44 (d, *J* = 7.6 Hz, 2H, ArH), 7.32 (brs, 1H, ArH), 7.21 (d, *J* = 8.0 Hz, 1H, ArH), 7.15-7.10 (m, 2H, ArH), 6.99-6.92 (m, 6H, ArH), 6.82 (t, *J* = 7.0 Hz, 2H, ArH), 6.67 (d, *J* = 8.8 Hz, 2H, ArH), 5.61 (d, *J* = 2.4 Hz, 1H, CH), 5.53 (s, 1H, CH), 3.91 (d, *J* = 13.2 Hz, 1H, CH), 3.82 (d, *J* = 12.8 Hz, 1H, CH), 3.70 (s, 4H, CH, OCH<sub>3</sub>), 3.70 (s, 3H, OCH<sub>3</sub>), 3.48 (s, 3H, NCH<sub>3</sub>), 3.23 (s, 3H, NCH<sub>3</sub>), 2.97 (s, 3H, NCH<sub>3</sub>), 2.84 (s, 3H, NCH<sub>3</sub>); <sup>13</sup>C NMR (100 MHz, CDCl<sub>3</sub>) δ: 169.7, 166.5, 162.0, 157.2, 155.9, 151.0, 149.0, 142.6, 139.2, 133.6, 132.0, 131.4, 131.1, 130.9, 130.1, 129.9, 128.8, 127.6, 127.6, 122.6, 120.9, 114.1, 94.2, 84.5, 63.8, 62.1, 55.2, 46.5, 39.9, 36.9, 28.7, 28.5, 27.9; IR (KBr) ν: 2957, 1678, 1647, 1478, 1376, 1239, 1171, 1019, 908, 827, 758, 657 cm<sup>-1</sup>; MS (*m/z*): HRMS (ESI) Calcd. for C<sub>42</sub>H<sub>37</sub>Br<sub>2</sub>FN<sub>5</sub>O<sub>7</sub> ([M+H]<sup>+</sup>): 902.1023, found: 902.1021.

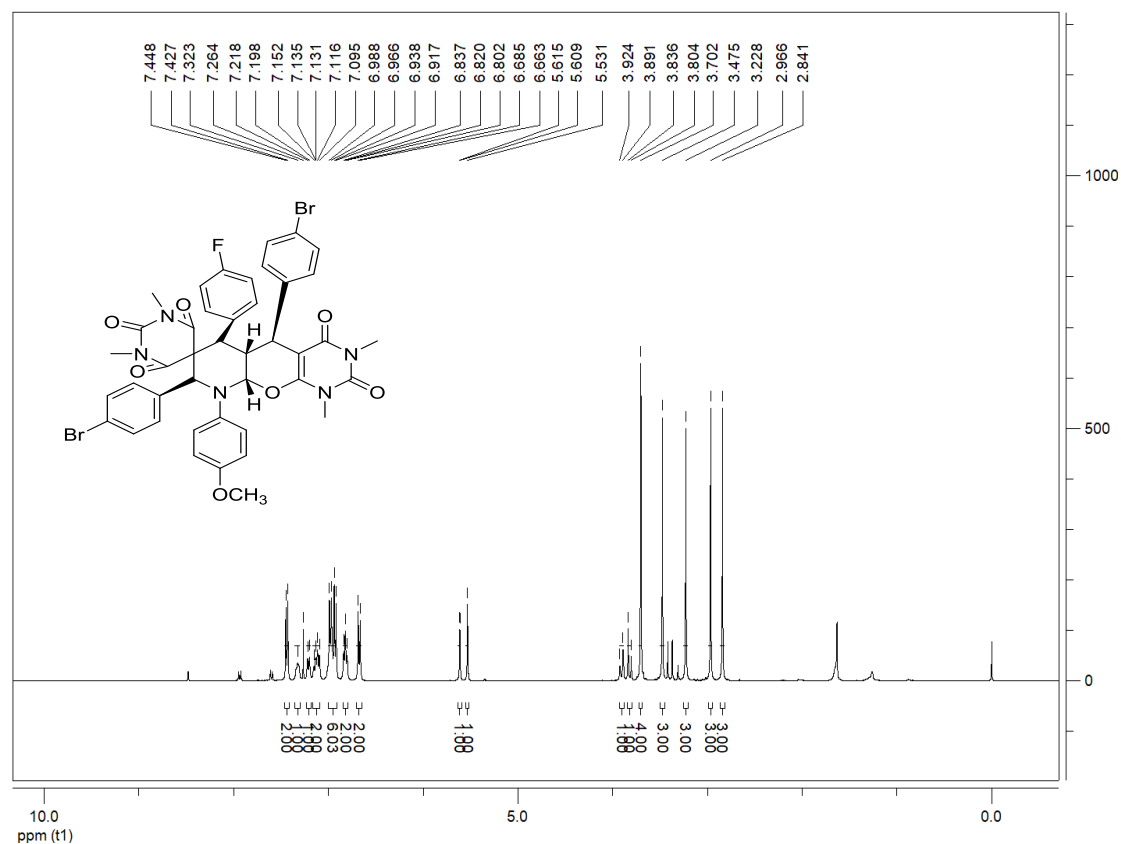

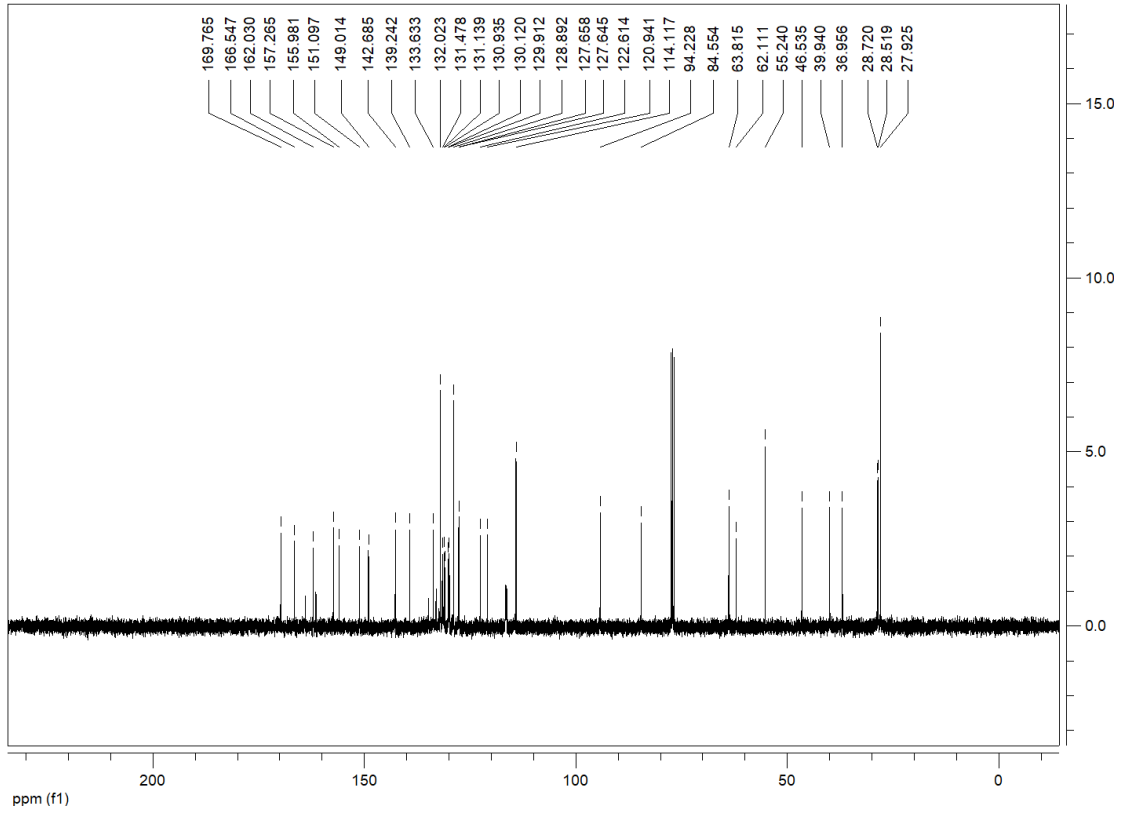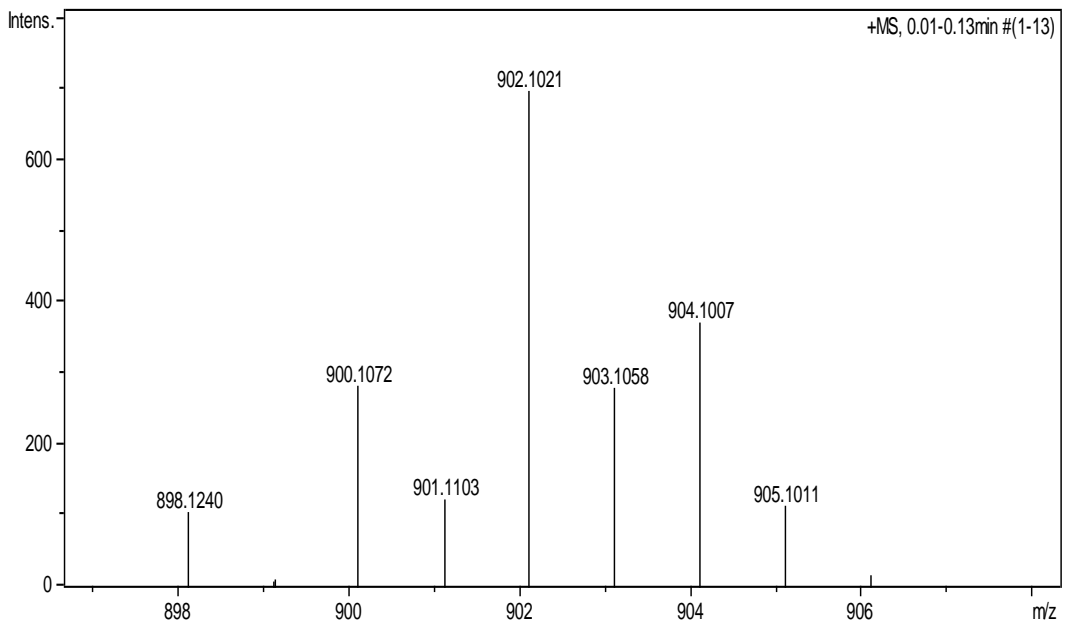



***rel*-(5*S*,5*aS*,6*S*,8*R*,9*aS*)-5,8-bis(4-bromophenyl)-9-(4-methoxyphenyl)-1,1',3,3'-tetramethyl-6-phenyl-1,5,5*a*,8,9,9*a*-hexahydro-2*H*,2'*H*,6*H*-spiro[pyrido[3',2':5,6]pyrano[2,3-*d*]pyrimidine-7,5'-pyrimidine]-2,2',4,4',6'-pentaone (3h):**

white solid, 93%, m.p.167-169°C; <sup>1</sup>H NMR (400 MHz, CDCl<sub>3</sub>) δ: 7.44-7.40 (m, 3H, ArH), 7.32-7.28 (m, 2H, ArH), 7.23-7.19 (m, 2H, ArH), 7.09 (d, *J* = 8.0 Hz, 1H, ArH), 7.00-6.94 (m, 5H, ArH), 6.84 (d, *J* = 8.0 Hz, 2H, ArH), 6.68 (d, *J* = 8.4 Hz, 2H, ArH), 5.63 (s, 1H, CH), 5.59 (s, 1H, CH), 3.92-3.89 (m, 1H, CH), 3.79 (d, *J* = 13.2 Hz, 1H, CH), 3.75 (s, 1H, CH), 3.70 (s, 3H, OCH<sub>3</sub>), 3.48 (s, 3H, NCH<sub>3</sub>), 3.22 (s, 3H, NCH<sub>3</sub>), 2.95 (s, 3H, NCH<sub>3</sub>), 2.82 (s, 3H, NCH<sub>3</sub>); <sup>13</sup>C NMR (100 MHz, CDCl<sub>3</sub>) δ: 169.8, 166.5, 162.0, 157.1, 156.0, 151.1, 149.1, 142.8, 139.3, 134.8, 133.8, 131.9, 131.4, 131.1, 130.3, 130.0, 129.4, 129.2, 129.1, 128.9, 127.6, 125.6, 122.4, 120.8, 114.0, 94.3, 84.7, 63.4, 62.0, 55.2, 47.5, 39.7, 37.0, 28.7, 28.4, 27.9, 27.8; IR(KBr) ν: 3046, 2954, 1749, 1648, 1479, 1378, 1246, 1173, 1022, 907, 830, 758, 708, 661 cm<sup>-1</sup>; MS (*m/z*): HRMS (ESI) Calcd. for C<sub>42</sub>H<sub>38</sub>Br<sub>2</sub>N<sub>5</sub>O<sub>7</sub>([M+H]<sup>+</sup>): 884.1118, found: 884.1102.

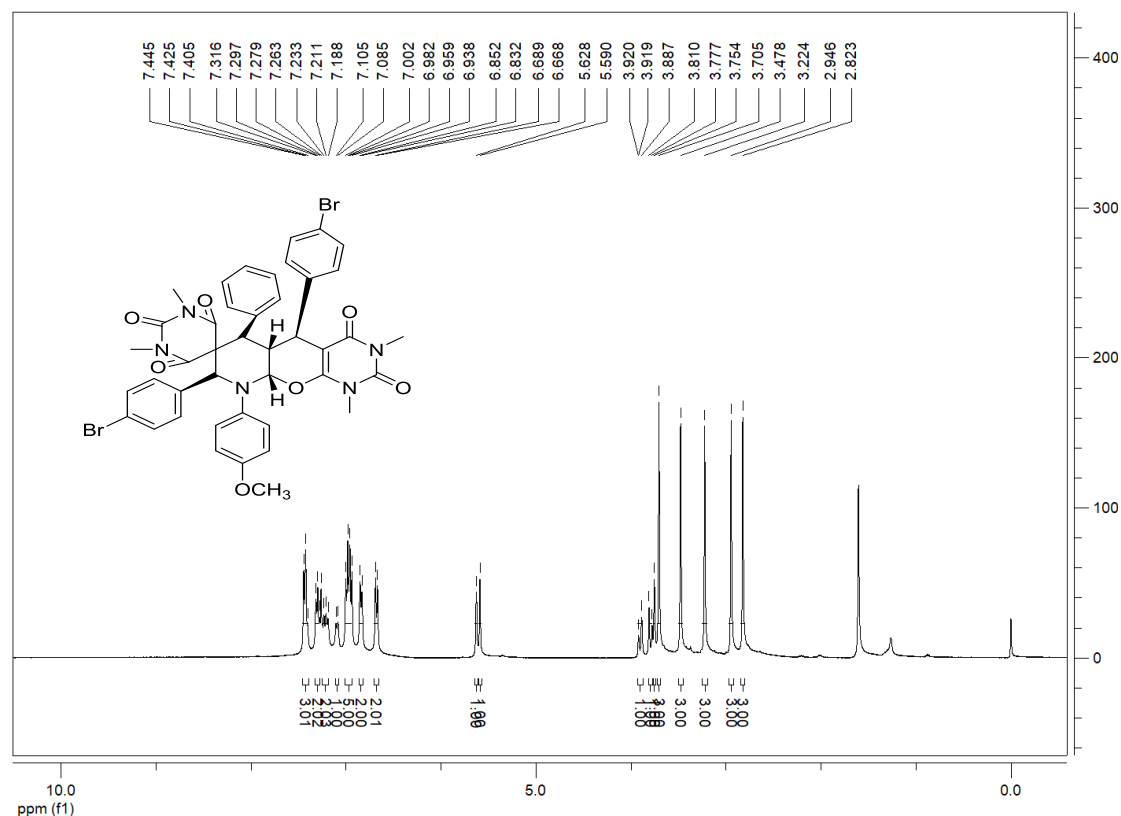

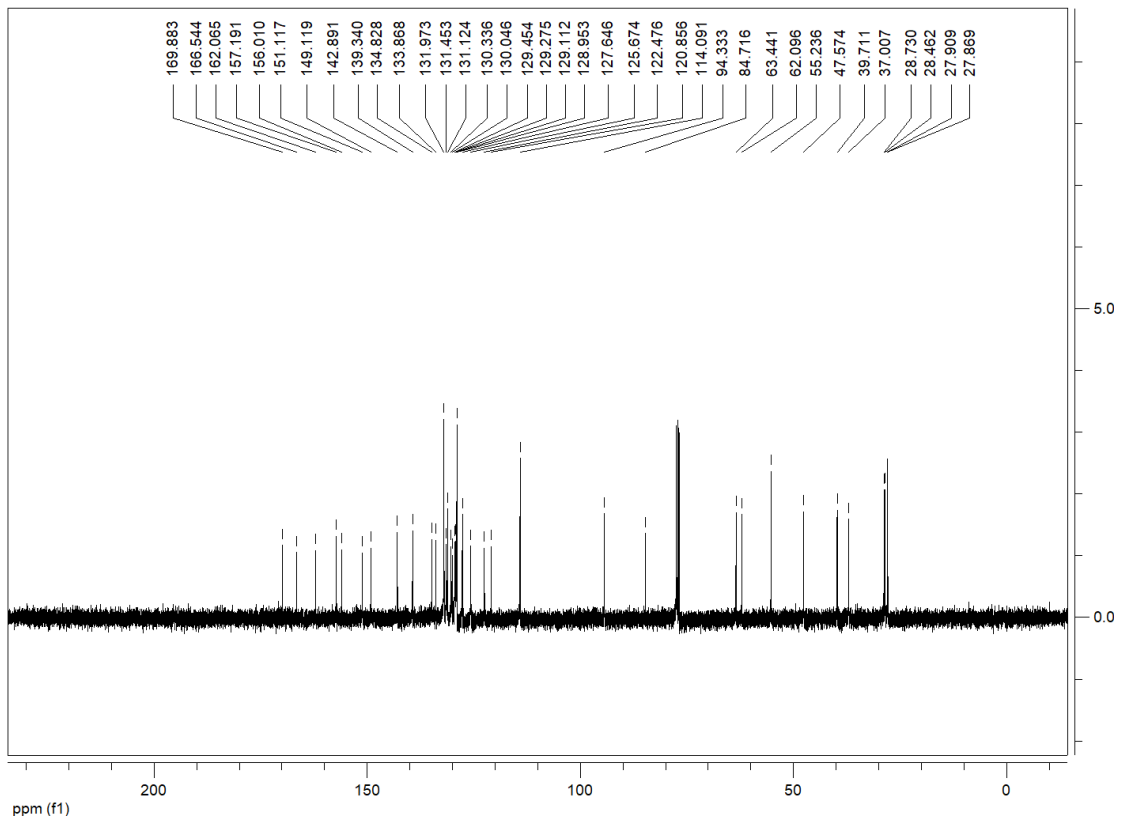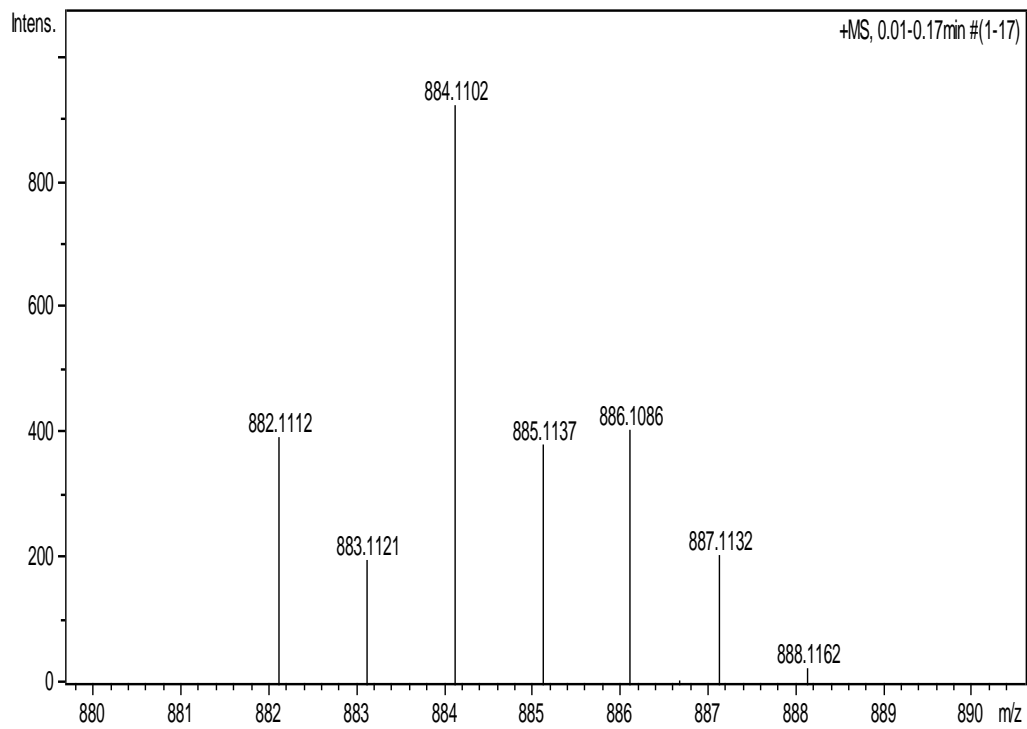

***rel*-(5*S*,5*aS*,6*S*,8*R*,9*aS*)-5,8-bis(4-bromophenyl)-9-(4-methoxyphenyl)-1,1',3,3'-tetramethyl-6-(*p*-tolyl)-1,5,5*a*,8,9,9*a*-hexahydro-2*H*,2'*H*,6*H*-spiro[pyrido[3',2':5,6]pyrano[2,3-*d*]pyrimidine-7,5'-pyrimidine]-2,2',4,4',6'-pentaone (3i):**

Yellow solid, 90%, m.p.160-162 °C; <sup>1</sup>H NMR (400 MHz, CDCl<sub>3</sub>) δ: 7.44-7.42 (m, 2H, ArH), 7.19 (brs, 3H, ArH), 7.10 (d, *J* = 7.2 Hz, 1H, ArH), 7.02-6.93 (m, 5H, ArH), 6.85-6.83 (m, 3H, ArH), 6.69-6.66 (m, 2H, ArH), 5.62 (s, 1H, CH), 5.57 (s, 1H, CH), 3.88 (d, *J* = 12.8 Hz, 1H, CH), 3.76-3.73 (m, 2H, 2CH), 3.70 (s, 3H, OCH<sub>3</sub>), 3.47 (s, 3H, NCH<sub>3</sub>), 3.23 (s, 3H, NCH<sub>3</sub>), 2.96 (s, 3H, NCH<sub>3</sub>), 2.84 (s, 3H, NCH<sub>3</sub>); <sup>13</sup>C NMR (100 MHz, CDCl<sub>3</sub>) δ: 169.9, 166.6, 162.0, 157.1, 156.0, 151.1, 149.2, 142.9, 139.3, 138.8, 133.9, 131.9, 131.6, 131.4, 131.0, 130.2, 130.0, 130.0, 128.9, 127.6, 125.5, 122.4, 120.7, 114.0, 94.3, 84.7, 63.4, 62.1, 55.2, 47.1, 39.8, 36.8, 28.7, 28.4, 27.8, 21.0; IR(KBr) ν: 2956, 1651, 1480, 1378, 1251, 1173, 1023, 908, 818, 754, 715, 659 cm<sup>-1</sup>; MS (*m/z*): HRMS (ESI) Calcd. for C<sub>43</sub>H<sub>40</sub>Br<sub>2</sub>N<sub>5</sub>O<sub>7</sub>([M+H]<sup>+</sup>): 898.1274, found: 898.1270.

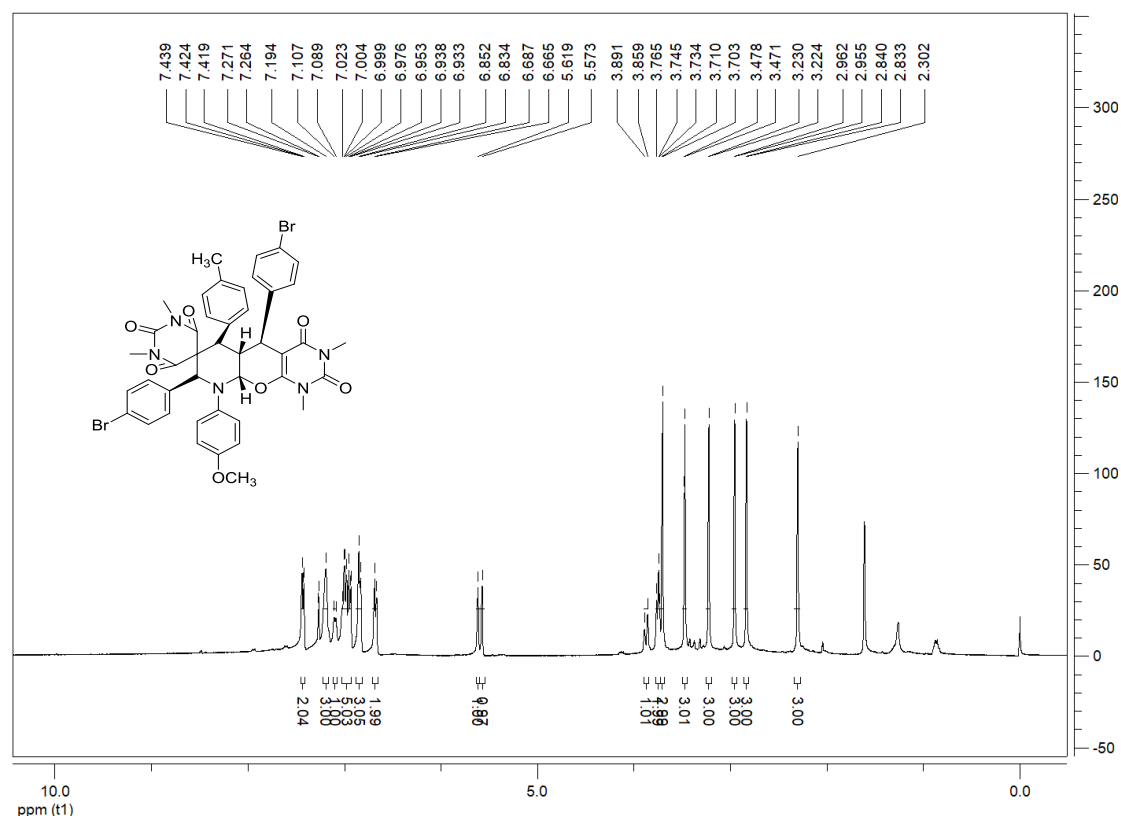

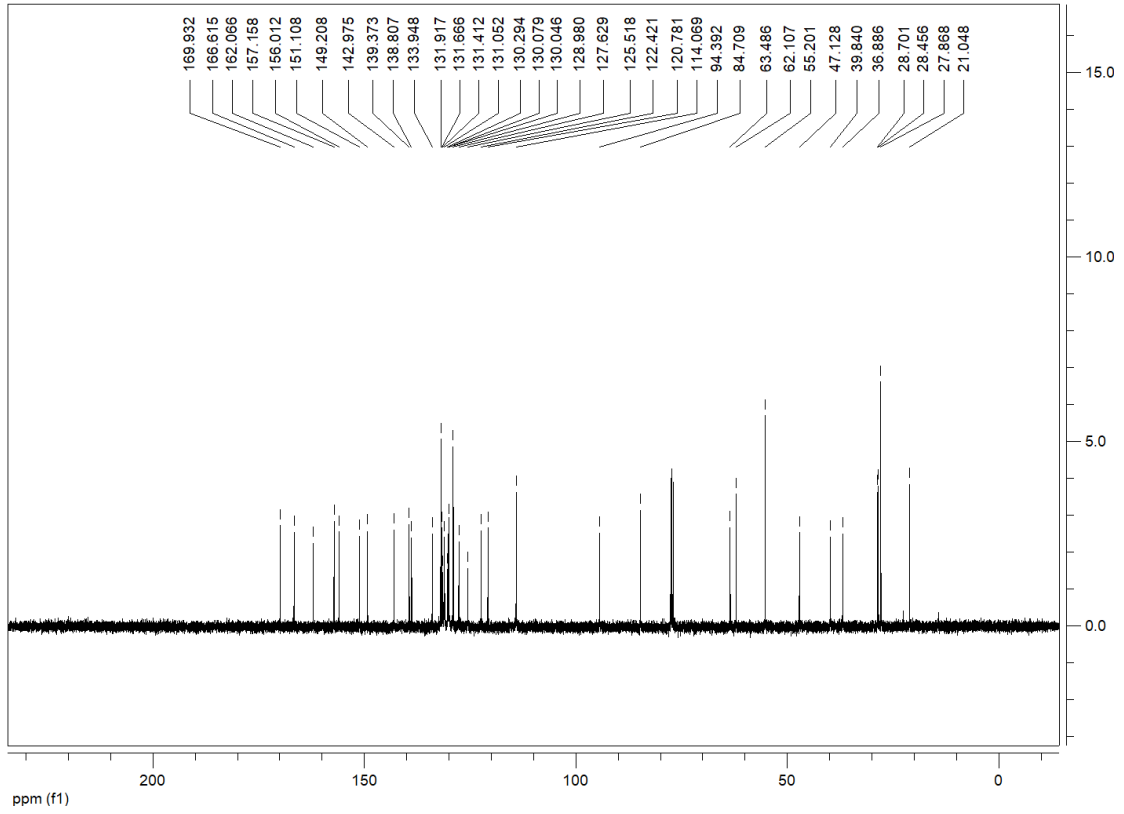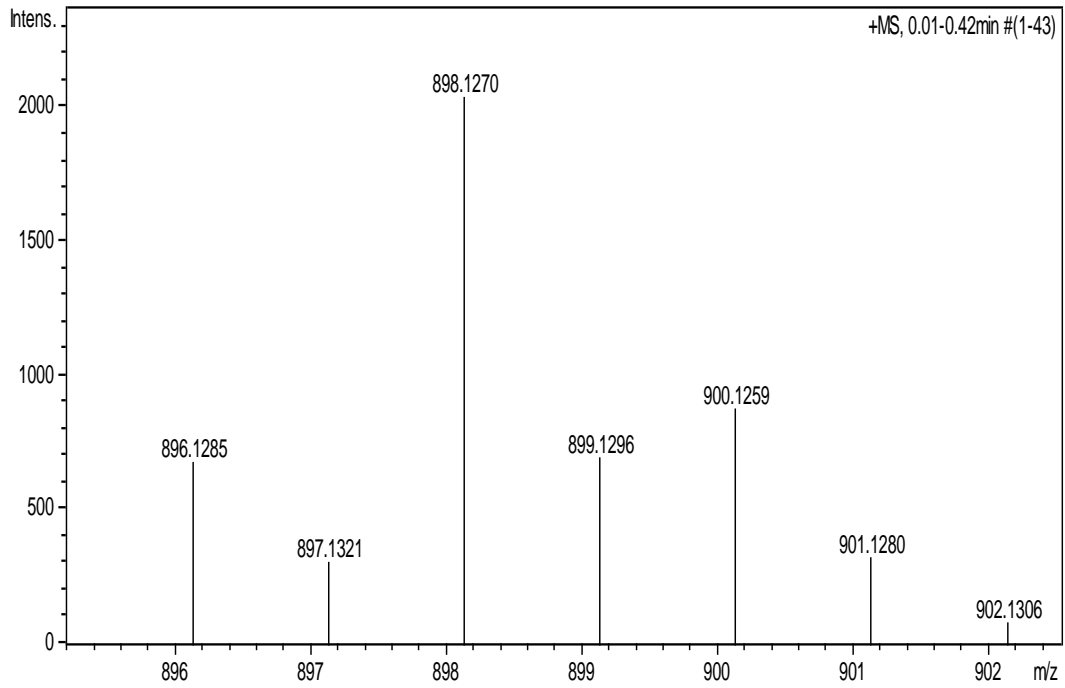

***rel*-(5S,5aS,6S,8R,9aS)-5,8-bis(4-bromophenyl)-6,9-bis(4-methoxyphenyl)-1,1',3,3'-tetramethyl-1,5,5a,8,9,9a-hexahydro-2H,2'H,6H-spiro[pyrido[3',2':5,6]pyrano[2,3-d]pyrimidine-7,5'-pyrimidine]-2,2',4,4',6'-pentaone (3j):**

Yellow solid, 78%, m.p.153-155 °C; <sup>1</sup>H NMR (400 MHz, CDCl<sub>3</sub>) δ: 7.43 (d, *J* = 8.4 Hz, 2H, ArH), 7.21 (t, *J* = 8.0 Hz, 2H, ArH), 7.10 (t, *J* = 8.0 Hz, 1H, ArH), 6.99-6.93 (m, 5H, ArH), 6.91-6.89 (m, 1H, ArH), 6.83 (d, *J* = 8.0 Hz, 2H, ArH), 6.74-6.72 (m, 1H, ArH), 6.67 (d, *J* = 8.8 Hz, 2H, ArH), 5.61 (d, *J* = 2.4 Hz, 1H, CH), 5.56 (s, 1H, CH), 3.88-3.84 (m, 1H, CH), 3.78 (s, 3H, OCH<sub>3</sub>), 3.76-3.73 (m, 2H, 2CH), 3.70 (s, 3H, OCH<sub>3</sub>), 3.47 (s, 3H, NCH<sub>3</sub>), 3.23 (s, 3H, NCH<sub>3</sub>), 2.96 (s, 3H, NCH<sub>3</sub>), 2.84 (s, 3H, NCH<sub>3</sub>); <sup>13</sup>C NMR (100 MHz, CDCl<sub>3</sub>) δ: 170.0, 166.6, 162.0, 159.7, 157.1, 156.0, 151.1, 149.1, 142.9, 139.3, 133.9, 132.3, 131.9, 131.4, 131.0, 130.2, 129.9, 128.9, 127.6, 126.8, 126.5, 122.4, 120.7, 115.2, 114.2, 114.0, 94.4, 84.7, 63.5, 62.2, 55.2, 46.7, 40.0, 36.8, 28.7, 28.4, 27.8; IR(KBr) ν: 2954, 2838, 1650, 1503, 1378, 1252, 1173, 1024, 909, 821, 754, 657 cm<sup>-1</sup>; MS (*m/z*): HRMS (ESI) Calcd. for C<sub>43</sub>H<sub>40</sub>Br<sub>2</sub>N<sub>5</sub>O<sub>8</sub>([M+H]<sup>+</sup>): 914.1223, found: 914.1219.

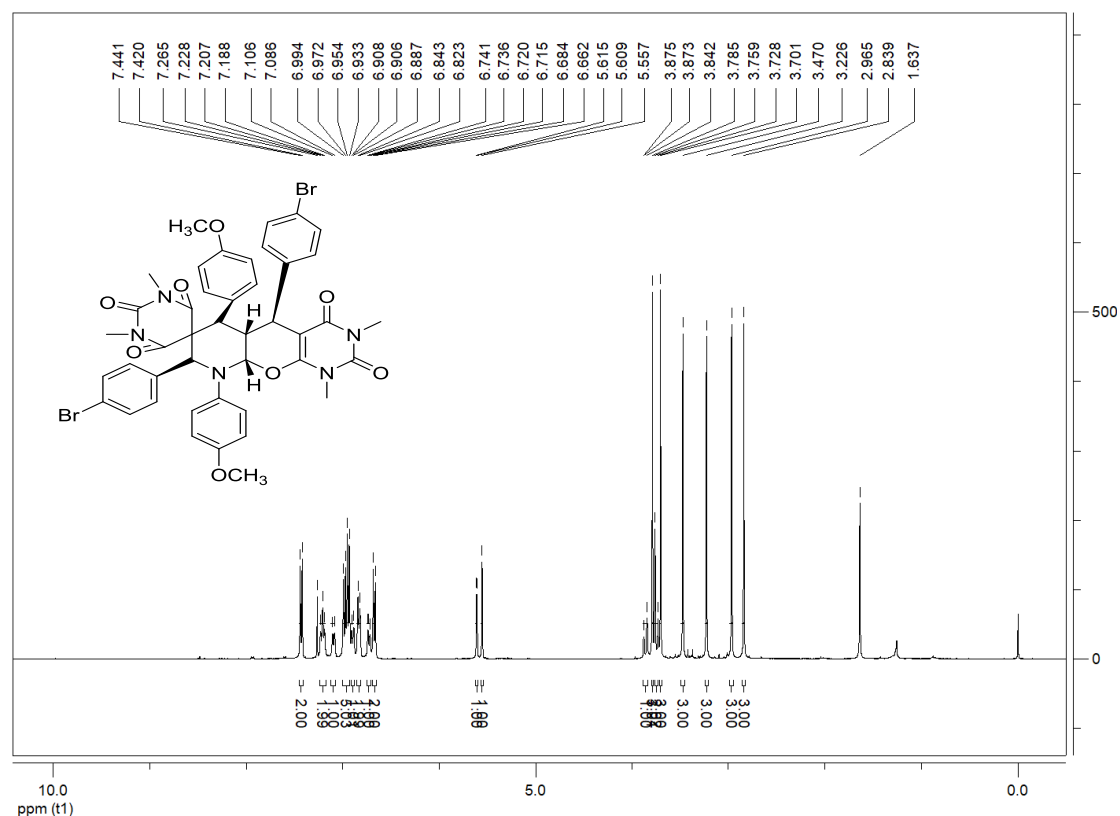

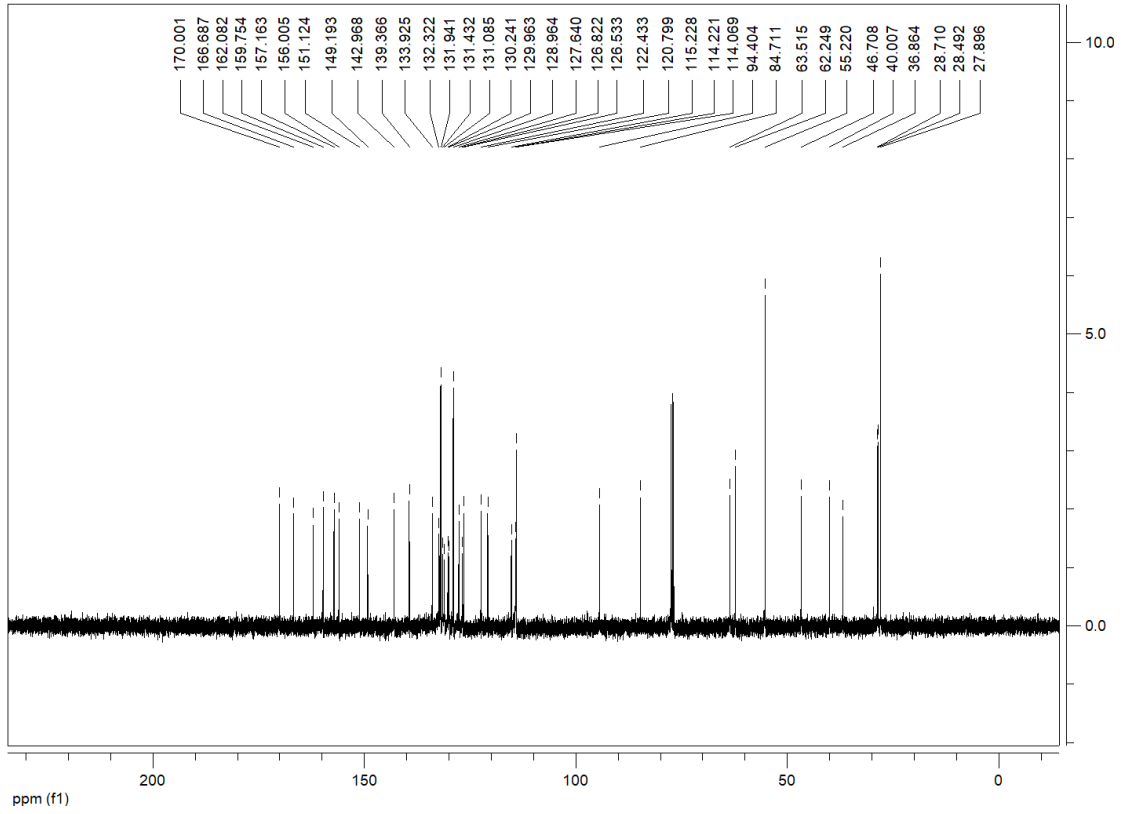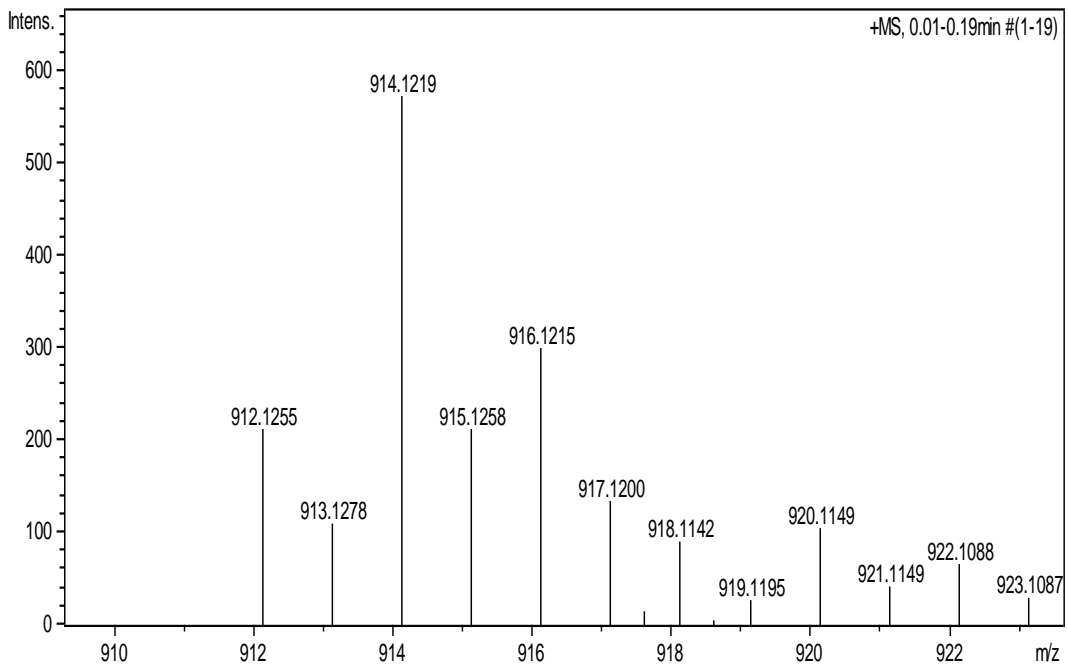

***rel*-(5*S*,5*aS*,6*S*,8*R*,9*aS*)-5,8-bis(4-bromophenyl)-6-(4-chlorophenyl)-9-(4-methoxyphenyl)-1,1',3,3'-tetramethyl-1,5,5*a*,8,9,9*a*-hexahydro-2*H*,2'*H*,6*H*-spiro[pyrido[3',2':5,6]pyrano[2,3-*d*]pyrimidine-7,5'-pyrimidine]-2,2',4,4',6'-pentaone (3k):**

white solid, 89%, m.p.184-186 °C; <sup>1</sup>H NMR (400 MHz, CDCl<sub>3</sub>) δ: 7.45-7.40 (m, 3H, ArH), 7.30-7.26 (m, 1H, ArH), 7.22-7.21 (m, 2H, ArH), 7.11 (d, *J* = 8.4 Hz, 1H, ArH), 6.98-6.91 (m, 5H, ArH), 6.81 (t, *J* = 8.0 Hz, 1H, ArH), 6.67 (d, *J* = 8.4 Hz, 2H, ArH), 5.61 (d, *J* = 2.0 Hz, 1H, CH), 5.51 (s, 1H, CH), 3.92 (d, *J* = 13.6 Hz, 1H, CH), 3.82 (d, *J* = 13.2 Hz, 1H, CH), 3.70 (s, 3H, OCH<sub>3</sub>), 3.68 (s, 1H, CH), 3.47 (s, 3H, NCH<sub>3</sub>), 3.23 (s, 3H, NCH<sub>3</sub>), 2.97 (s, 3H, NCH<sub>3</sub>), 2.85 (s, 3H, NCH<sub>3</sub>); <sup>13</sup>C NMR (100 MHz, CDCl<sub>3</sub>) δ: 169.6, 166.4, 162.0, 157.2, 155.9, 151.0, 148.9, 142.6, 139.1, 134.9, 133.6, 133.5, 132.6, 132.0, 131.4, 131.1, 130.0, 129.8, 129.6, 129.6, 128.8, 127.6, 127.2, 122.6, 120.9, 114.1, 94.1, 84.4, 63.9, 61.9, 60.3, 55.2, 46.4, 39.8, 36.9, 28.7, 28.5, 27.9, 27.9, 14.1; IR(KBr) ν: 2961, 1681, 1647, 1481, 1376, 1247, 1171, 1105, 1018, 916, 825 cm<sup>-1</sup>; MS (*m/z*): HRMS (ESI) Calcd. for C<sub>42</sub>H<sub>37</sub>Br<sub>2</sub>ClN<sub>5</sub>O<sub>7</sub>([M+H]<sup>+</sup>): 918.0728, found: 918.0725.

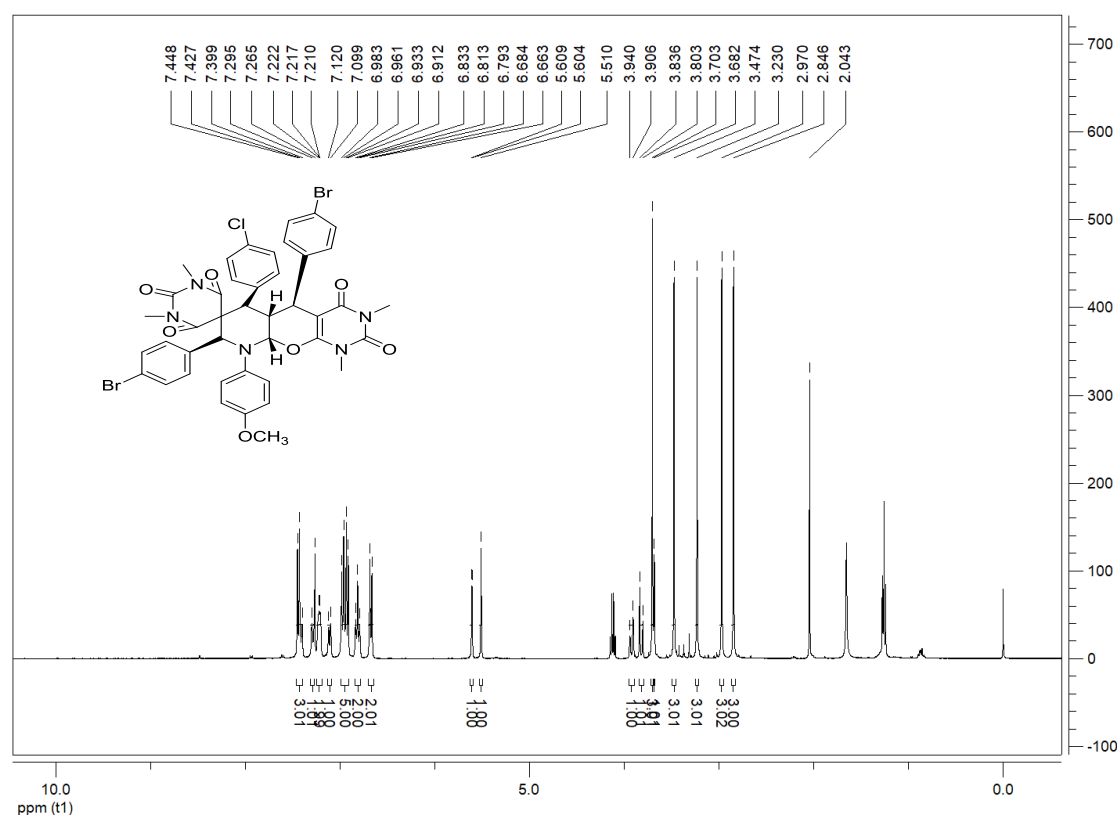

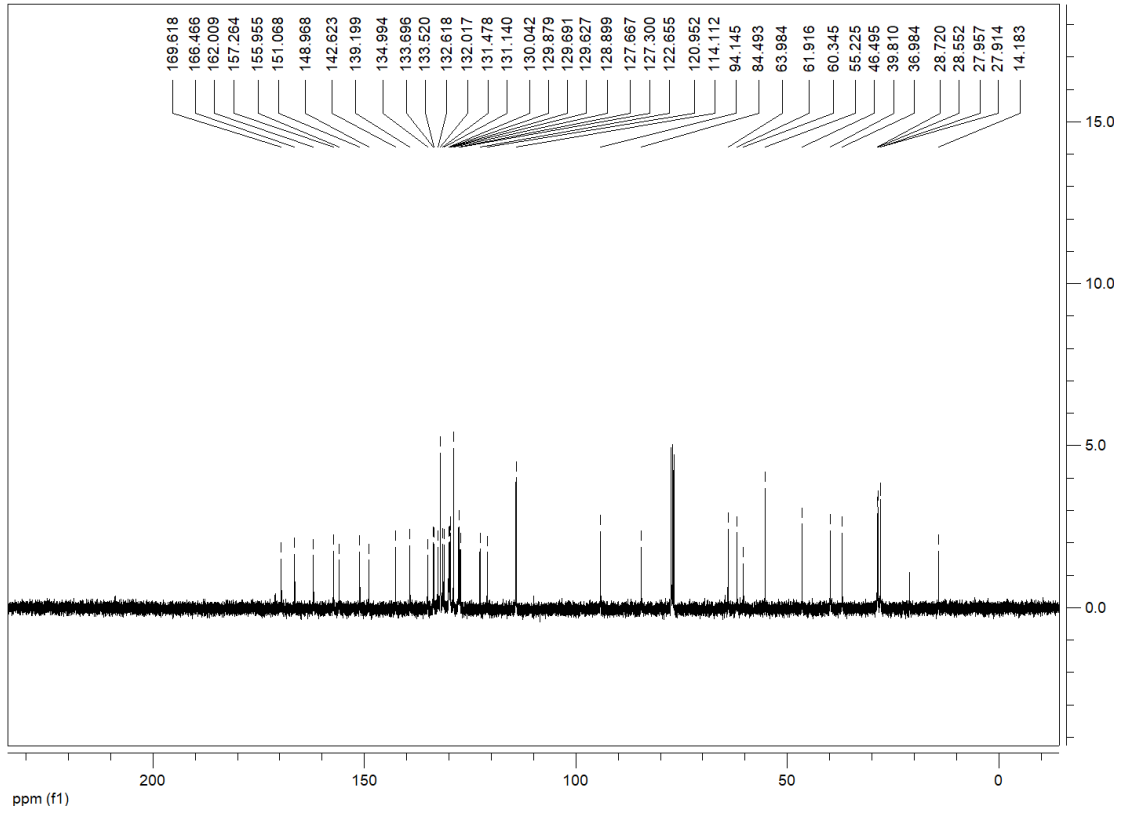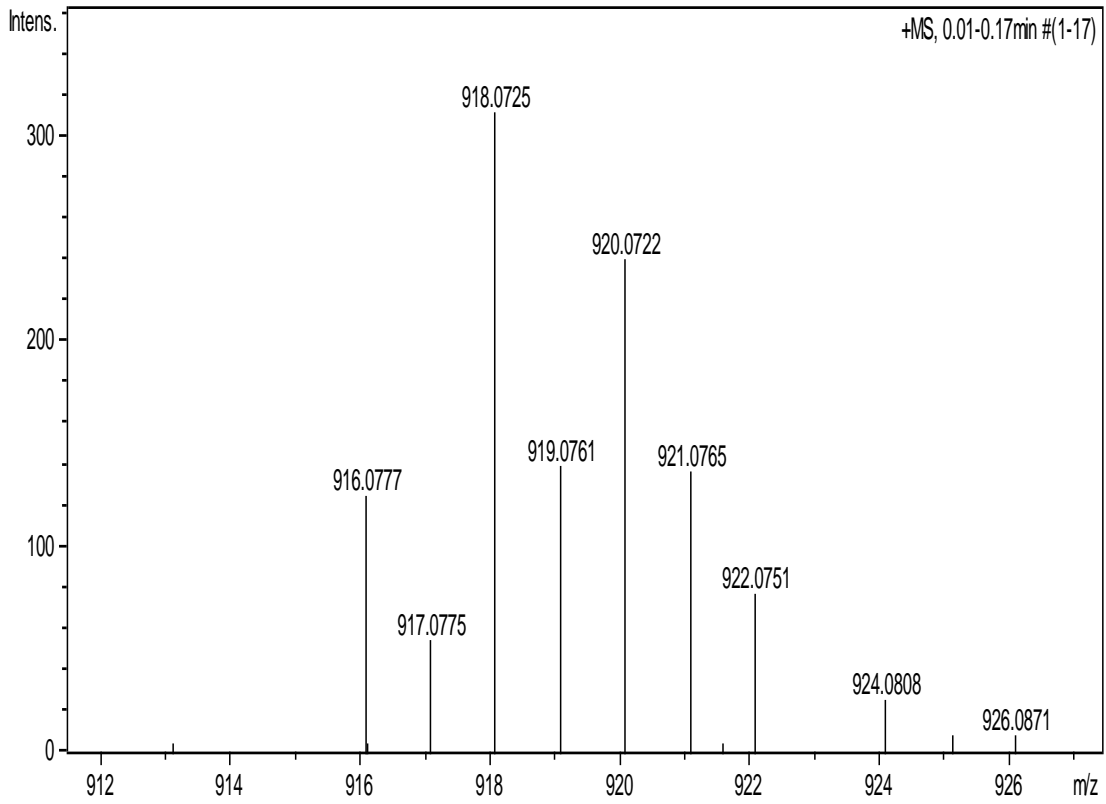





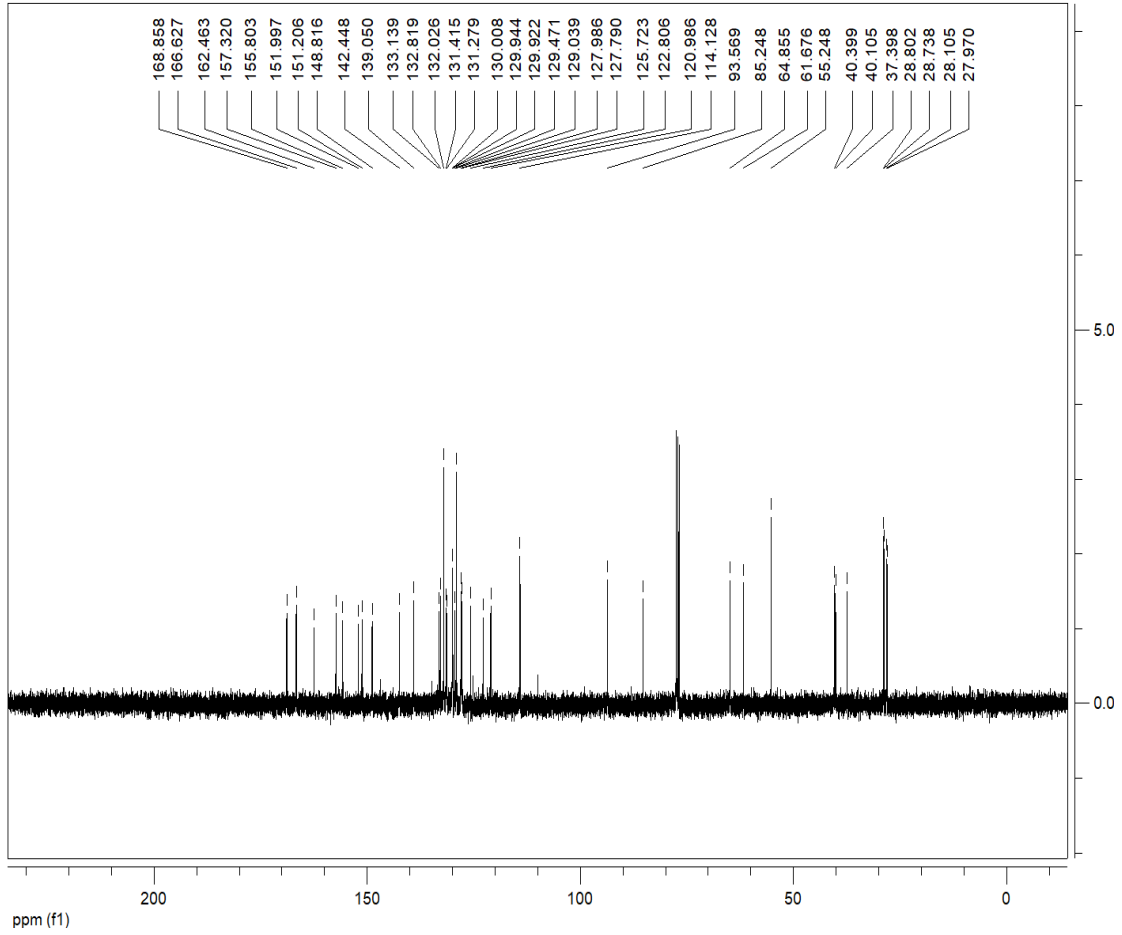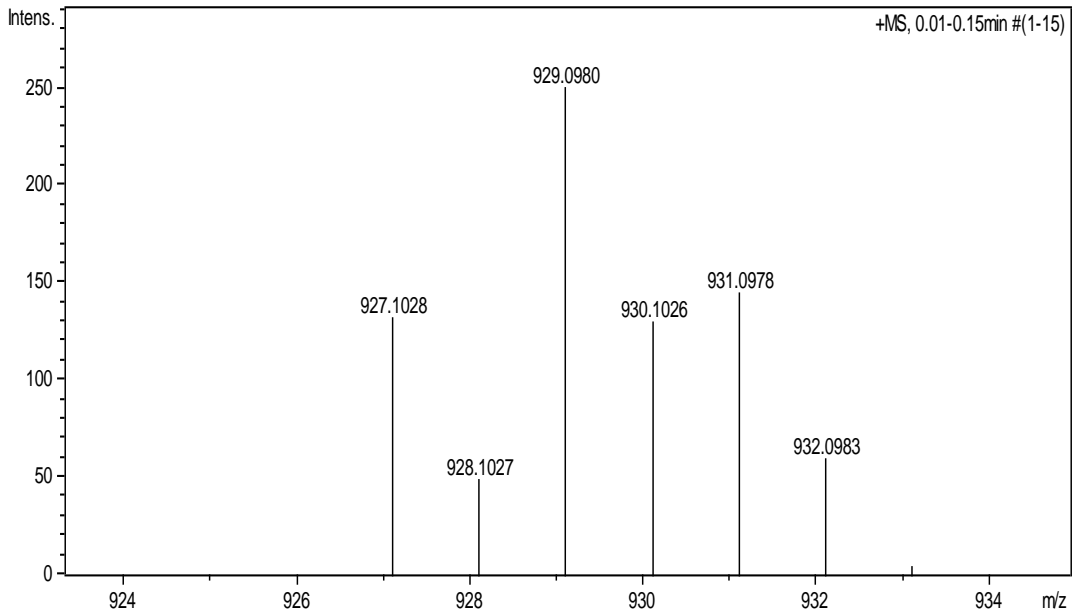

***rel*-(5*S*,5*aS*,6*S*,8*R*,9*aS*)-5,8-bis(2-methoxyphenyl)-1,1',3,3'-tetramethyl-6-phenyl-9-(*p*-tolyl)-1,5,5*a*,8,9,9*a*-hexahydro-2*H*,2'*H*,6*H*-spiro[pyrido[3',2':5,6]pyrano[2,3-*d*]pyrimidine-7,5'-pyrimidine]-2,2',4,4',6'(1'*H*,3*H*,3'*H*)-pentaone (4a):**

white solid, 47%, m.p.140-143 °C; <sup>1</sup>H NMR (400 MHz, CDCl<sub>3</sub>) δ: 7.51 (brs, 1H, ArH), 7.31 (brs, 1H, ArH), 7.23 -7.18 (m, 3H, ArH), 7.00-6.88 (m, 8H, ArH), 6.80-6.72 (m, 2H, ArH), 6.63 (d, *J* = 7.6 Hz, 1H, ArH), 6.54 (t, *J* = 7.0 Hz, 1H, ArH), 5.99 (s, 1H, CH), 5.74 (s, 1H, CH), 4.13-4.10 (m, 2H, CH), 3.96 (d, *J* = 13.2 Hz, 1H, CH), 3.84 (s, 3H, OCH<sub>3</sub>), 3.78 (s, 3H, OCH<sub>3</sub>), 3.48 (s, 3H, NCH<sub>3</sub>), 3.24 (s, 3H, NCH<sub>3</sub>), 2.92 (s, 3H, NCH<sub>3</sub>), 2.79 (s, 3H, NCH<sub>3</sub>), 2.16 (s, 3H, CH<sub>3</sub>); <sup>13</sup>C NMR (100 MHz, CDCl<sub>3</sub>) δ: 168.7, 167.6, 162.0, 156.8, 156.4, 156.3, 151.4, 149.8, 145.0, 135.3, 134.5, 130.9, 130.0, 129.4, 129.2, 128.2, 128.1, 127.9, 125.3, 122.8, 120.1, 119.9, 110.9, 109.7, 95.9, 84.8, 61.4, 55.9, 55.4, 54.7, 46.7, 36.8, 31.9, 28.6, 28.3, 27.8, 27.7, 20.7; IR(KBr) ν:3031, 2954, 2838, 1744, 1680, 1650, 1599, 1585, 1513, 1492, 1456, 1419, 1379, 1316, 1288, 1243, 1197, 1172, 1136, 1112, 1021, 986, 915, 893, 821, 798, 784, 756, 703, 673, 646 cm<sup>-1</sup>; MS (*m/z*): HRMS (ESI) Calcd. for C<sub>44</sub>H<sub>44</sub>N<sub>5</sub>O<sub>8</sub>([M+H]<sup>+</sup>): 770.3190, found: 770.3206.

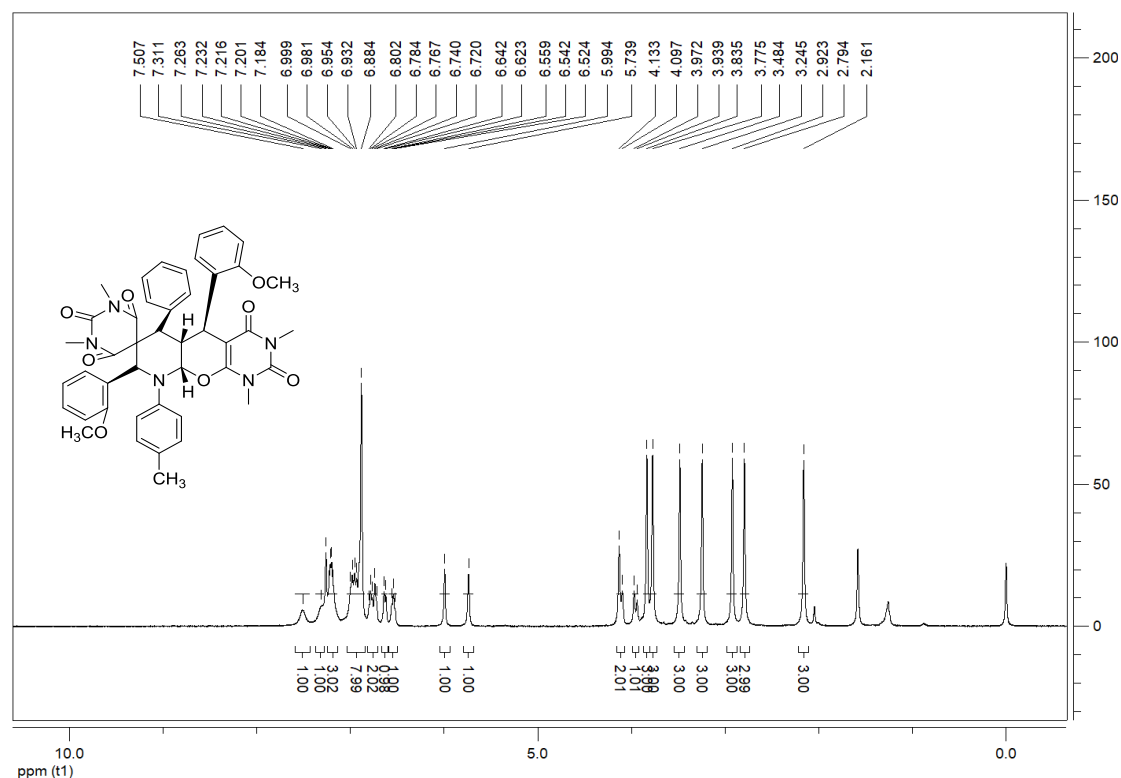

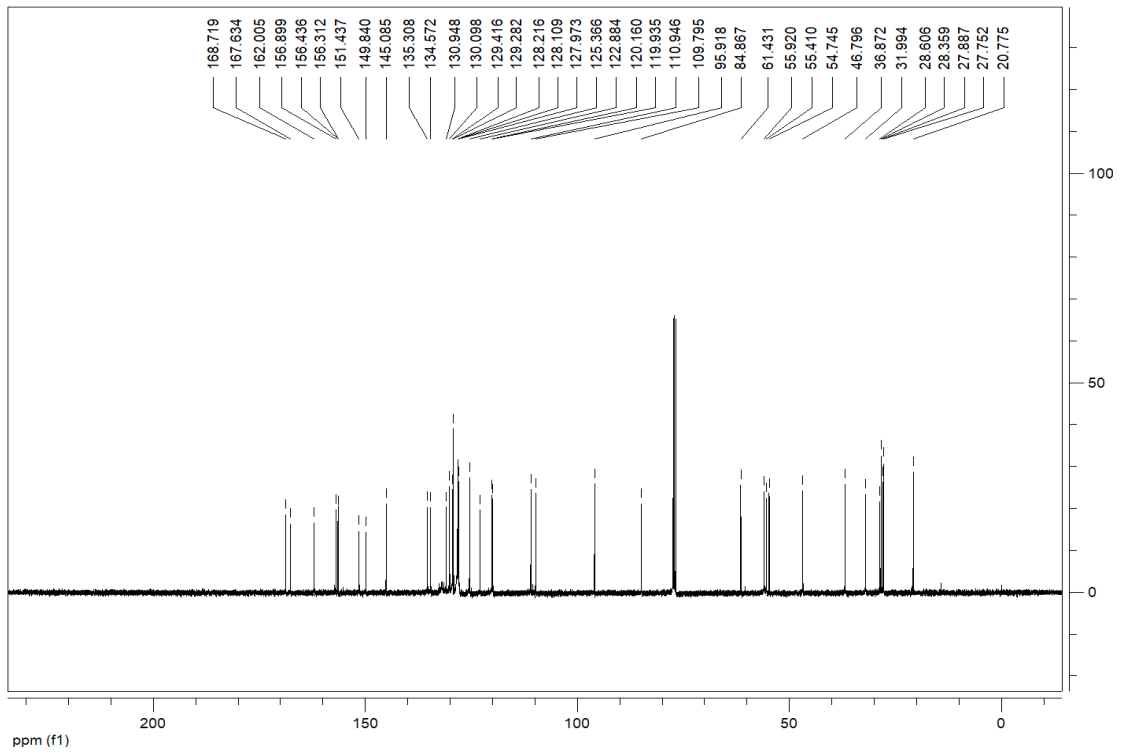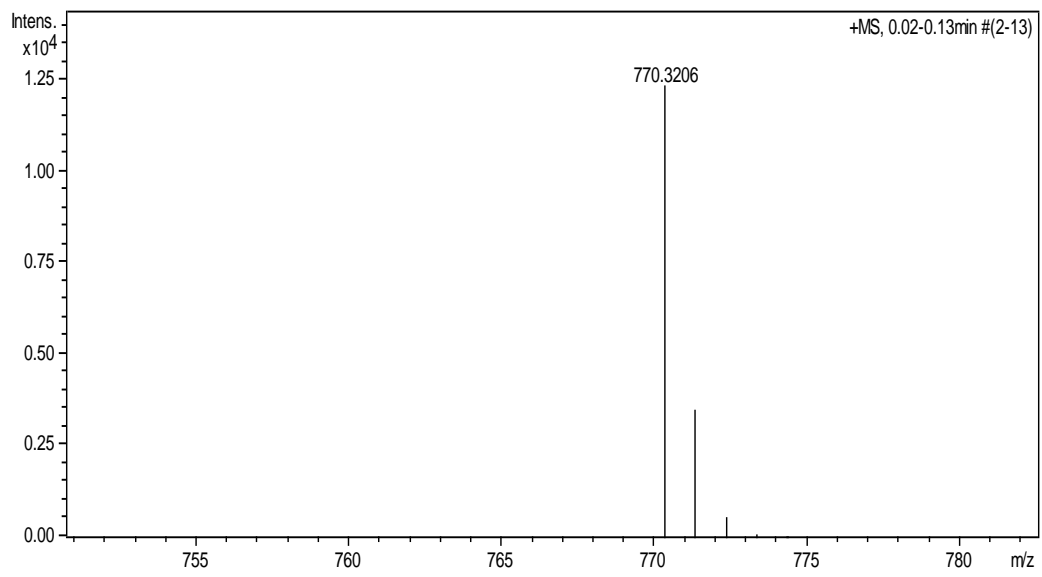

***rel*-(5*S*,5*aS*,6*S*,8*R*,9*aS*)-5,8-bis(2-methoxyphenyl)-9-(4-methoxyphenyl)-1,1',3,3'-tetramethyl-6-phenyl-1,5,5*a*,8,9,9*a*-hexahydro-2*H*,2'*H*,6*H*-spiro[pyrido[3',2':5,6]pyrano[2,3-*d*]pyrimidine-7,5'-pyrimidine]-2,2',4,4',6'-pentaone (4b):**

white solid, 47%, m.p.136-138 °C; <sup>1</sup>H NMR (400 MHz, CDCl<sub>3</sub>) δ: 7.50 (brs, 1H, ArH), 7.32 (brs, 1H, ArH), 7.24 -7.17 (m, 3H, ArH), 7.00-6.89 (m, 6H, ArH), 6.80-6.72 (m, 2H, ArH), 6.64-6.60 (m, 3H, ArH), 6.55 (t, *J* = 7.6 Hz, 1H, ArH), 5.98 (s, 1H, CH), 5.68 (d, *J* = 2.4 Hz, 1H, CH), 4.13 (s, 1H, CH), 4.10 (d, *J* = 14.8 Hz, 1H, CH), 3.96 (d, *J* = 12.8 Hz, 1H, CH), 3.83 (s, 3H, OCH<sub>3</sub>), 3.77 (s, 3H, OCH<sub>3</sub>), 3.66 (s, 3H, OCH<sub>3</sub>), 3.51 (s, 3H, NCH<sub>3</sub>), 3.25 (s, 3H, NCH<sub>3</sub>), 2.91 (s, 3H, NCH<sub>3</sub>), 2.81 (s, 3H, NCH<sub>3</sub>); <sup>13</sup>C NMR (100 MHz, CDCl<sub>3</sub>) δ: 168.6, 167.6, 162.0, 156.8, 156.7, 156.4, 156.3, 151.4, 149.8, 140.5, 135.3, 130.9, 130.1, 129.4, 129.1, 129.0, 128.2, 128.0, 127.9, 126.7, 122.7, 120.1, 119.9, 113.7, 110.9, 109.8, 95.9, 84.8, 61.4, 56.0, 55.4, 55.1, 54.7, 46.7, 36.8, 31.9, 28.6, 28.3, 27.9, 27.7; IR(KBr) ν: 3065, 2962, 2840, 1701, 1679, 1640, 1600, 1586, 1512, 1492, 1464, 1419, 1377, 1277, 1250, 1170, 1111, 1028, 986, 913, 889, 837, 828, 813, 800, 785, 755, 702, 672, 647 cm<sup>-1</sup>; MS (*m/z*): HRMS (ESI) Calcd. for C<sub>44</sub>H<sub>44</sub>N<sub>5</sub>O<sub>9</sub>([M+H]<sup>+</sup>): 786.3139, found: 786.3150.

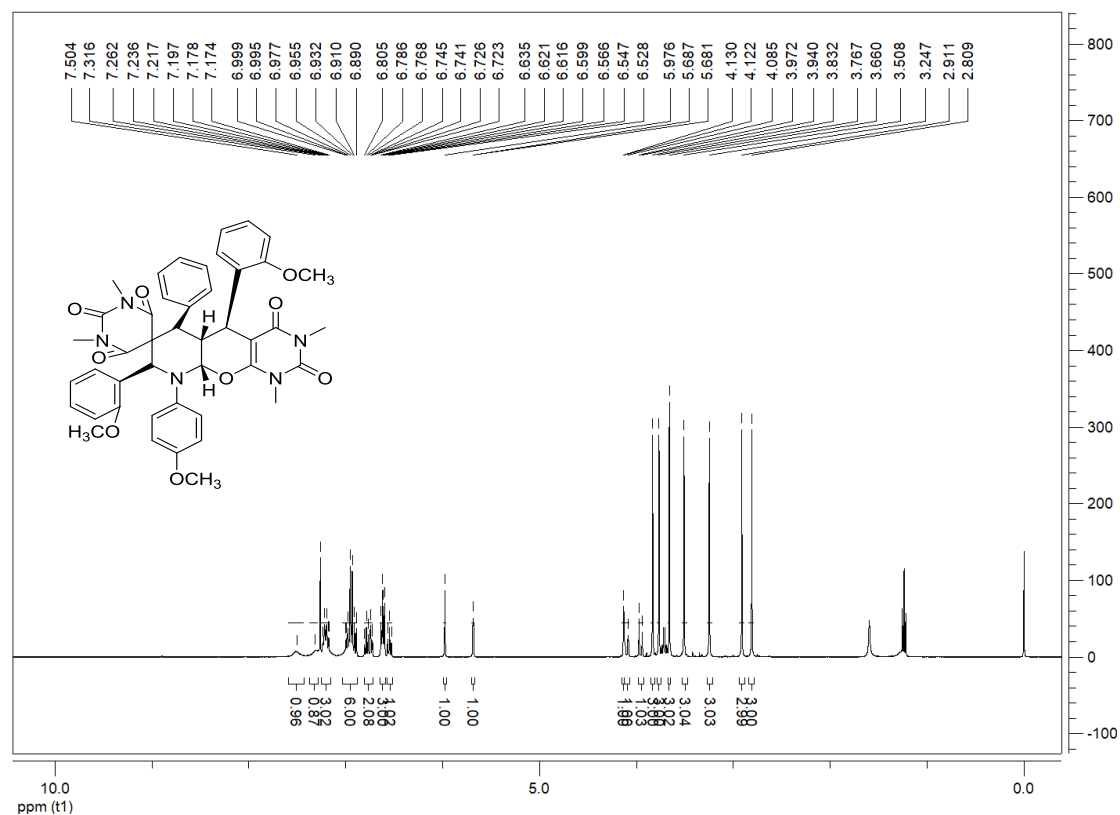

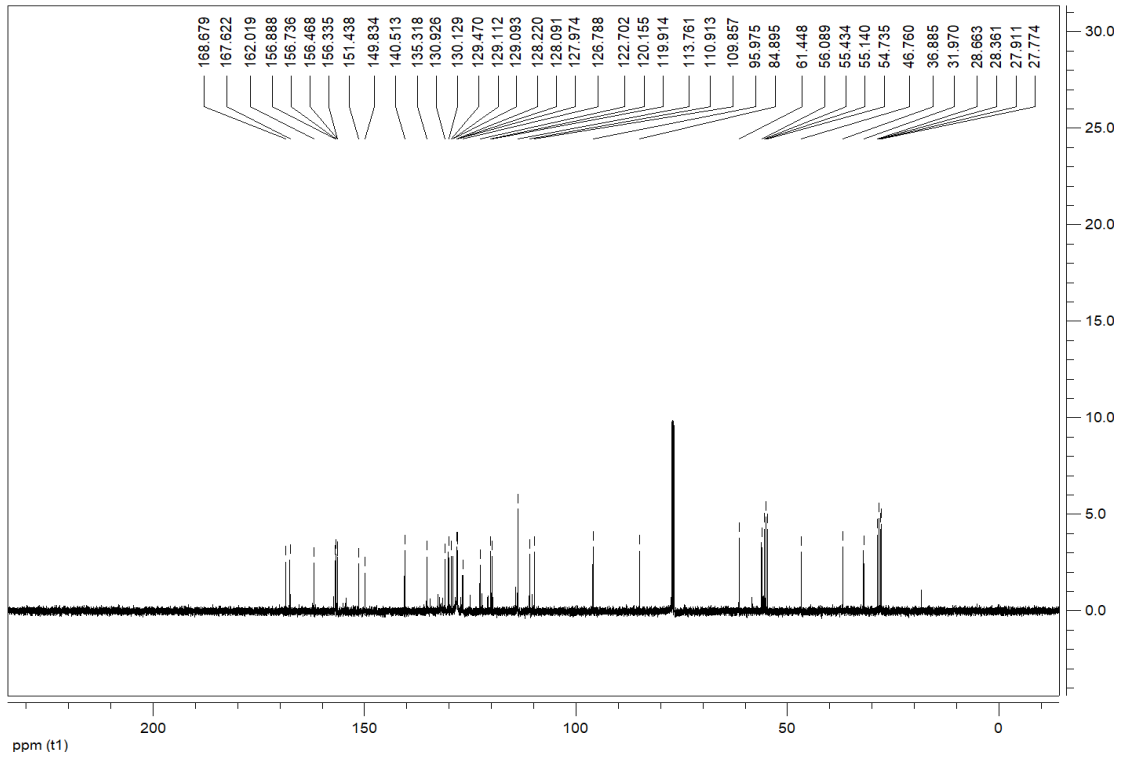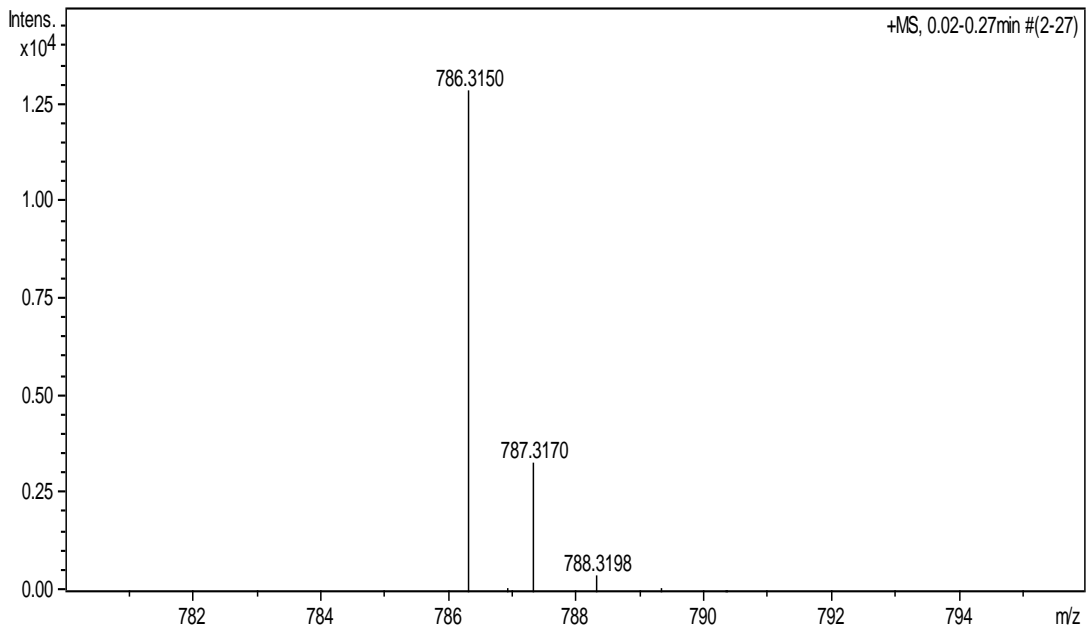

***rel*-(5S,5aS,6S,8R,9aS)-9-(3-chlorophenyl)-5,8-bis(2-methoxyphenyl)-1,1',3,3'-tetramethyl-6-phenyl-1,5,5a,8,9,9a-hexahydro-2H,2'H,6H-spiro[pyrido[3',2':5,6]pyrano[2,3-d]pyrimidine-7,5'-pyrimidine]-2,2',4,4',6'-pentaone (4c):**

white solid, 43%, m.p.149-150°C; <sup>1</sup>H NMR (400 MHz, CDCl<sub>3</sub>) δ: 7.48 (brs, 1H, ArH), 7.31 (brs, 1H, ArH), 7.23-7.17 (m, 3H, ArH), 7.01-6.98 (m, 4H, ArH), 6.92-6.85 (m, 4H, ArH), 6.81 (t, *J* = 7.4 Hz, 1H, ArH), 6.74 (d, *J* = 7.2 Hz, 1H, ArH), 6.65 (d, *J* = 8.4 Hz, 1H, ArH), 6.56 (t, *J* = 7.4 Hz, 1H, ArH), 5.95 (s, 1H, CH), 5.72 (s, 1H, CH), 4.13-4.09 (m, 2H, CH), 3.93 (d, *J* = 12.8 Hz, 1H, CH), 3.82 (s, 3H, OCH<sub>3</sub>), 3.79 (s, 3H, OCH<sub>3</sub>), 3.46 (s, 3H, NCH<sub>3</sub>), 3.24 (s, 3H, NCH<sub>3</sub>), 2.90 (s, 3H, NCH<sub>3</sub>), 2.81 (s, 3H, NCH<sub>3</sub>); <sup>13</sup>C NMR (100 MHz, CDCl<sub>3</sub>) δ: 168.5, 167.5, 161.9, 156.9, 156.3, 156.1, 151.3, 149.7, 148.9, 135.0, 134.1, 130.7, 129.8, 129.6, 129.5, 128.3, 128.1, 128.0, 126.0, 125.3, 123.7, 122.3, 120.2, 120.1, 111.0, 110.0, 109.9, 95.0, 84.9, 61.2, 55.6, 55.5, 54.7, 46.8, 36.7, 31.9, 28.5, 28.3, 27.9, 27.8; IR(KBr) ν: 3071, 3000, 2957, 2838, 1712, 1681, 1651, 1588, 1487, 1419, 1379, 1282, 1243, 1170, 1137, 1109, 1026, 986, 918, 867, 815, 798, 751, 702, 671, 646, cm<sup>-1</sup>; MS (*m/z*): HRMS (ESI) Calcd. for C<sub>43</sub>H<sub>41</sub>ClN<sub>5</sub>O<sub>8</sub>([M+H]<sup>+</sup>): 790.2644, found: 790.2649.

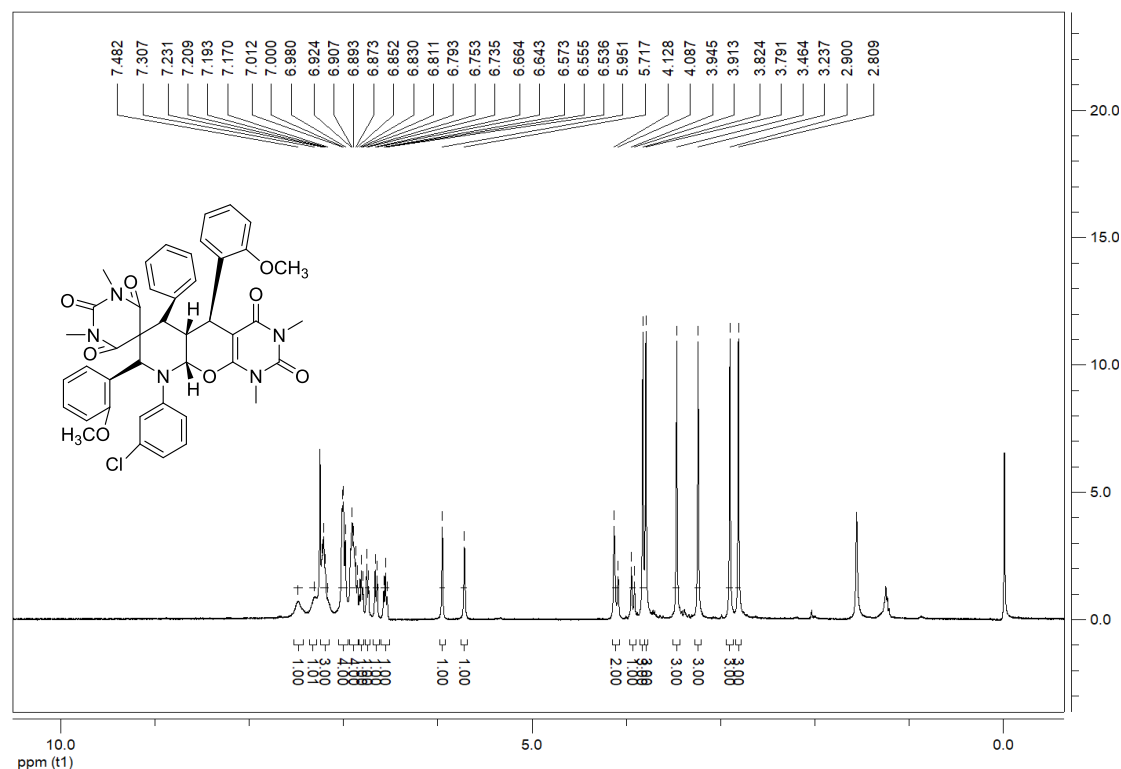

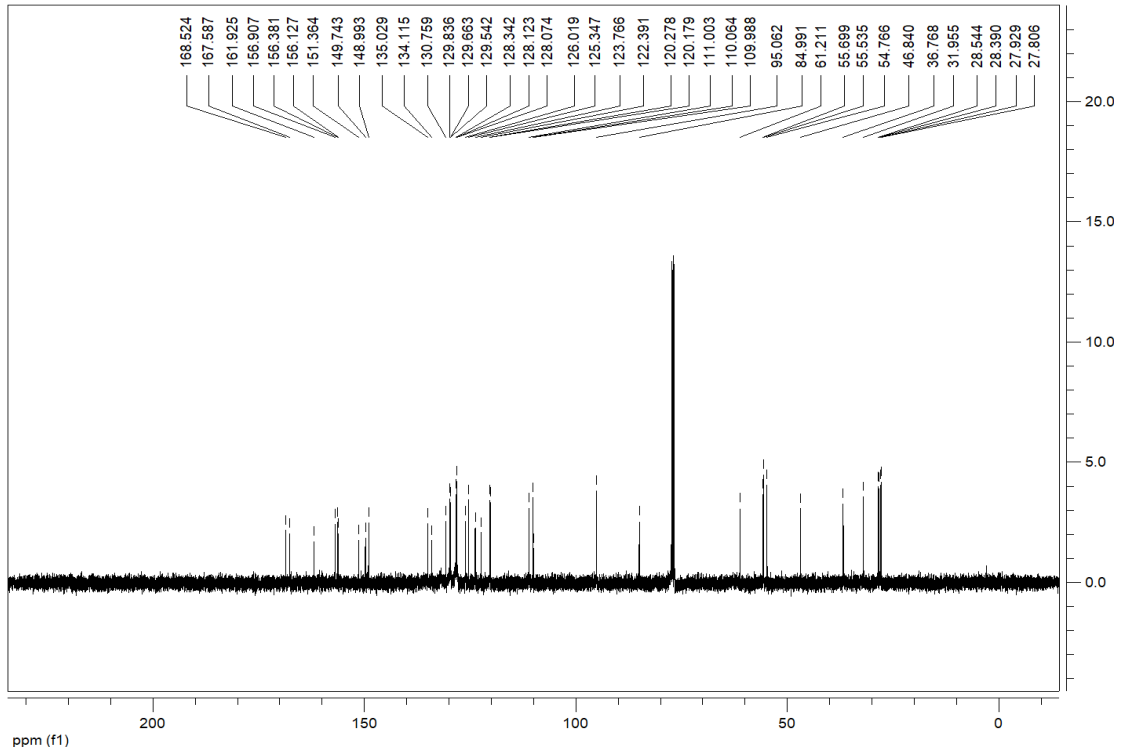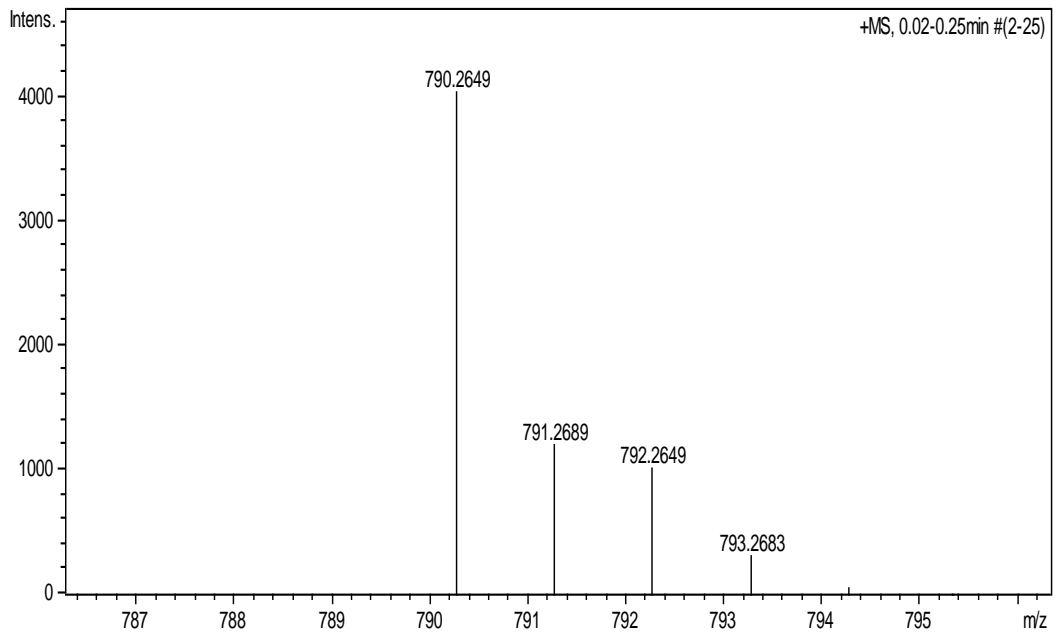



***rel*-(5*S*,5*aS*,6*S*,8*R*,9*aS*)-9-(4-chlorophenyl)-5,8-bis(2-methoxyphenyl)-1,1',3,3'-tetramethyl-6-phenyl-1,5,5*a*,8,9,9*a*-hexahydro-2*H*,2'*H*,6*H*-spiro[pyrido[3',2':5,6]pyrano[2,3-*d*]pyrimidine-7,5'-pyrimidine]-2,2',4,4',6'-pentaone (4d):**

white solid, 57%, m.p.139-140°C; <sup>1</sup>H NMR (400 MHz, CDCl<sub>3</sub>) δ:7.48 (brs, 1H, ArH), 7.30 (brs, 1H, ArH), 7.22-7.16 (m, 3H, ArH), 7.06-6.98 (m, 4H, ArH), 6.92-6.89 (m, 4H, ArH), 6.80 (t, *J* = 7.4 Hz, 1H, ArH), 6.72 (d, *J* = 7.2 Hz, 1H, ArH), 6.64 (d, *J* = 8.4 Hz, 1H, ArH), 6.54 (t, *J* = 7.6 Hz, 1H, ArH), 5.95 (s, 1H, CH), 5.69 (s, 1H, CH), 4.12-4.08 (m, 2H, CH), 3.92 (d, *J*=12.8 Hz, 1H, CH), 3.82 (s, 3H, OCH<sub>3</sub>), 3.77 (s, 3H, OCH<sub>3</sub>), 3.45 (s, 3H, NCH<sub>3</sub>), 3.23 (s, 3H, NCH<sub>3</sub>), 2.91 (s, 3H, NCH<sub>3</sub>), 2.79 (s, 3H, NCH<sub>3</sub>); <sup>13</sup>C NMR (100 MHz, CDCl<sub>3</sub>) δ: 168.5, 167.5, 161.9, 156.8, 156.2, 156.1, 151.3, 149.7, 146.3, 135.0, 130.8, 130.4, 129.8, 129.7, 128.8, 128.3, 128.0, 128.0, 126.7, 122.4, 120.2, 120.1, 111.0, 109.9, 95.3, 84.9, 61.2, 55.7, 55.4, 54.7, 46.8, 36.7, 31.9, 28.5, 28.3, 27.9, 27.7; IR(KBr) ν: 2951, 2836, 1707, 1682, 1649, 1600, 1492, 1461, 1419, 1380, 1286, 1243, 1171, 1138, 1111, 1090, 1050, 1029, 987, 917, 894, 821, 800, 786, 758, 703, 673, 659, 644, cm<sup>-1</sup>; MS (*m/z*): HRMS (ESI) Calcd. for C<sub>43</sub>H<sub>41</sub>ClN<sub>5</sub>O<sub>8</sub>([M+H]<sup>+</sup>): 790.2644, found: 790.2638.

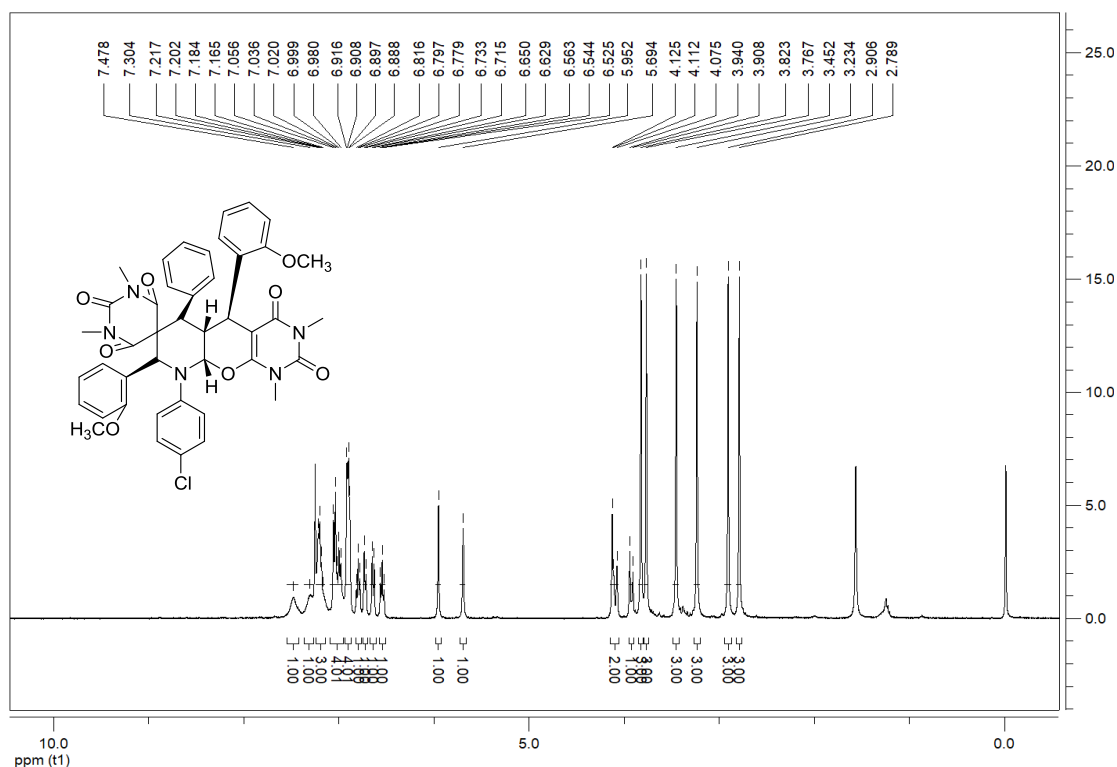

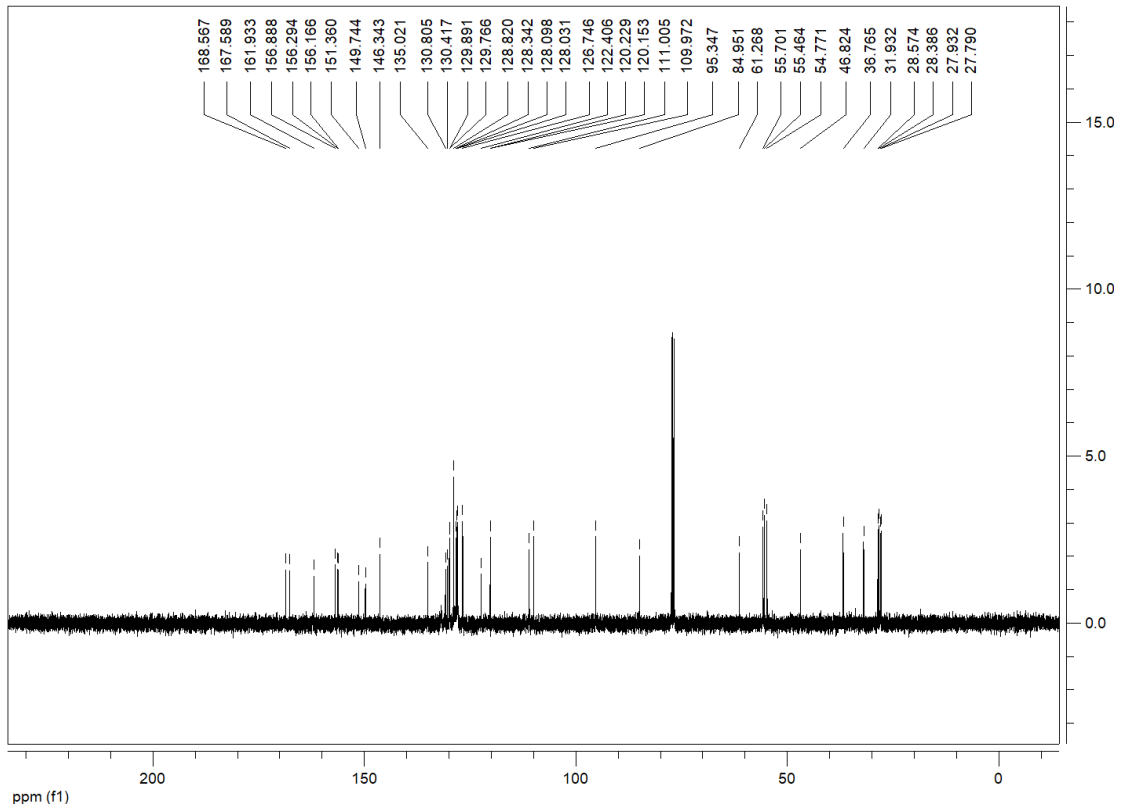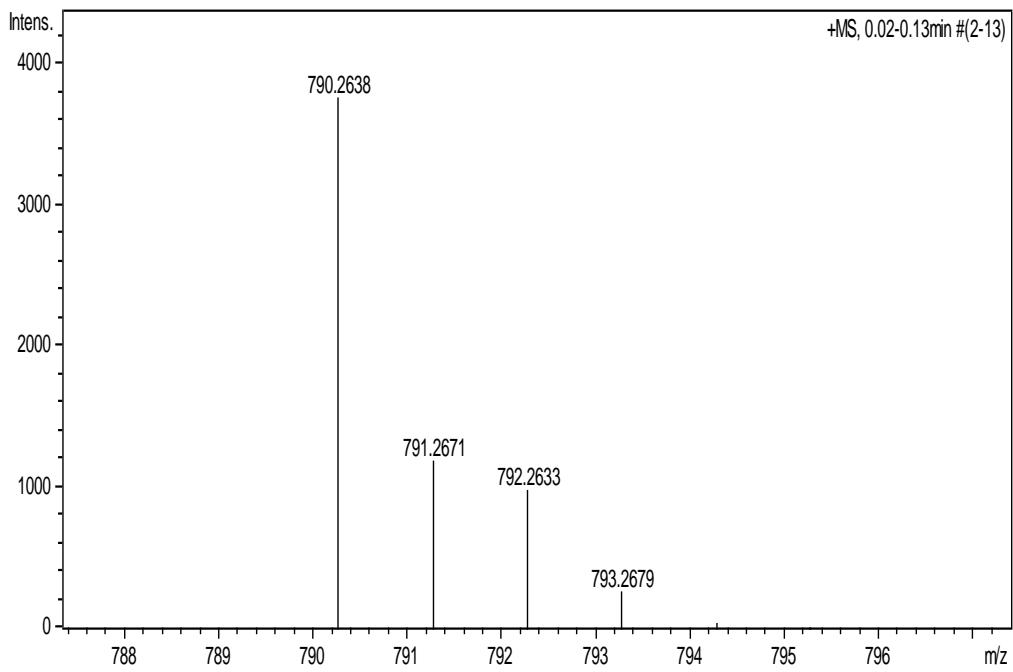

***rel*-(5*S*,5*aS*,6*S*,8*R*,9*aS*)-9-(4-bromophenyl)-5,8-bis(2-methoxyphenyl)-1,1',3,3'-tetramethyl-6-phenyl-1,5,5*a*,8,9,9*a*-hexahydro-2*H*,2'*H*,6*H*-spiro[pyrido[3',2':5,6]pyrano[2,3-*d*]pyrimidine-7,5'-pyrimidine]-2,2',4,4',6'-pentaone (4e):**

white solid, 46%, m.p.137-138 °C; <sup>1</sup>H NMR (400 MHz, CDCl<sub>3</sub>) δ: 7.49 (brs, 1H, ArH), 7.32 (brs, 1H, ArH), 7.24-7.20 (m, 5H, ArH), 7.04-6.99 (m, 2H, ArH), 6.92-6.89 (m, 2H, ArH), 6.88-6.84 (m, 2H, ArH), 6.81 (t, *J* = 7.4 Hz, 1H, ArH), 6.74-6.72 (m, 1H, ArH), 6.65 (d, *J* = 8.0 Hz, 1H, ArH), 6.56 (t, *J* = 7.6 Hz, 1H, ArH), 5.96 (s, 1H, CH), 5.71 (d, *J* = 2.4 Hz, 1H, CH), 4.14 (s, 1H, CH), 4.12-4.08 (m, 1H, CH), 3.93 (d, *J* = 12.8 Hz, 1H, CH), 3.84 (s, 3H, OCH<sub>3</sub>), 3.78 (s, 3H, OCH<sub>3</sub>), 3.46 (s, 3H, NCH<sub>3</sub>), 3.25 (s, 3H, NCH<sub>3</sub>), 2.92 (s, 3H, NCH<sub>3</sub>), 2.80 (s, 3H, NCH<sub>3</sub>); <sup>13</sup>C NMR (100 MHz, CDCl<sub>3</sub>) δ: 168.5, 167.5, 161.9, 156.8, 156.2, 156.1, 151.3, 149.7, 146.8, 135.0, 131.7, 130.7, 129.8, 129.7, 128.3, 128.1, 128.0, 127.9, 127.1, 122.3, 120.2, 120.1, 118.3, 110.9, 109.9, 95.2, 84.9, 61.2, 55.6, 55.4, 54.7, 46.7, 36.7, 31.9, 28.5, 28.3, 27.9, 27.8; IR(KBr) ν: 3065, 3032, 2957, 2839, 1746, 1689, 1676, 1658, 1640, 1600, 1586, 1491, 1419, 1379, 1287, 1243, 1198, 1172, 1137, 1110, 1075, 1051, 1027, 987, 938, 916, 892, 815, 799, 785, 756, 704, 672, 653, 638, 605 cm<sup>-1</sup>; MS (*m/z*): HRMS (ESI) Calcd. for C<sub>43</sub>H<sub>41</sub>BrN<sub>5</sub>O<sub>8</sub>([M+H]<sup>+</sup>): 834.2139, found: 834.2151.

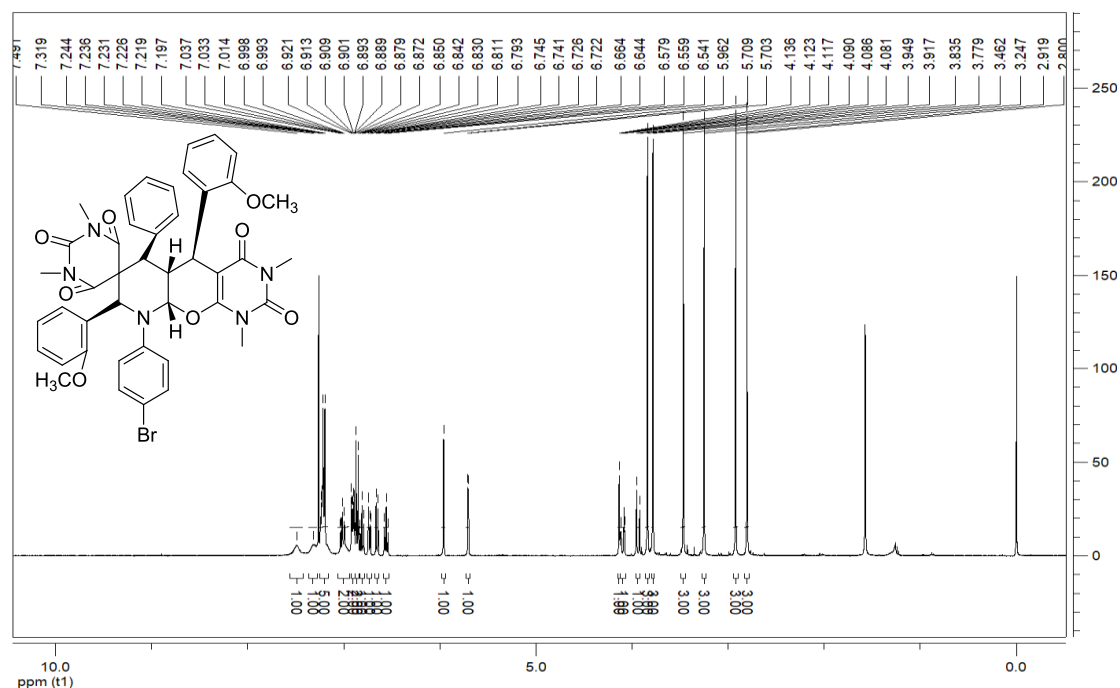

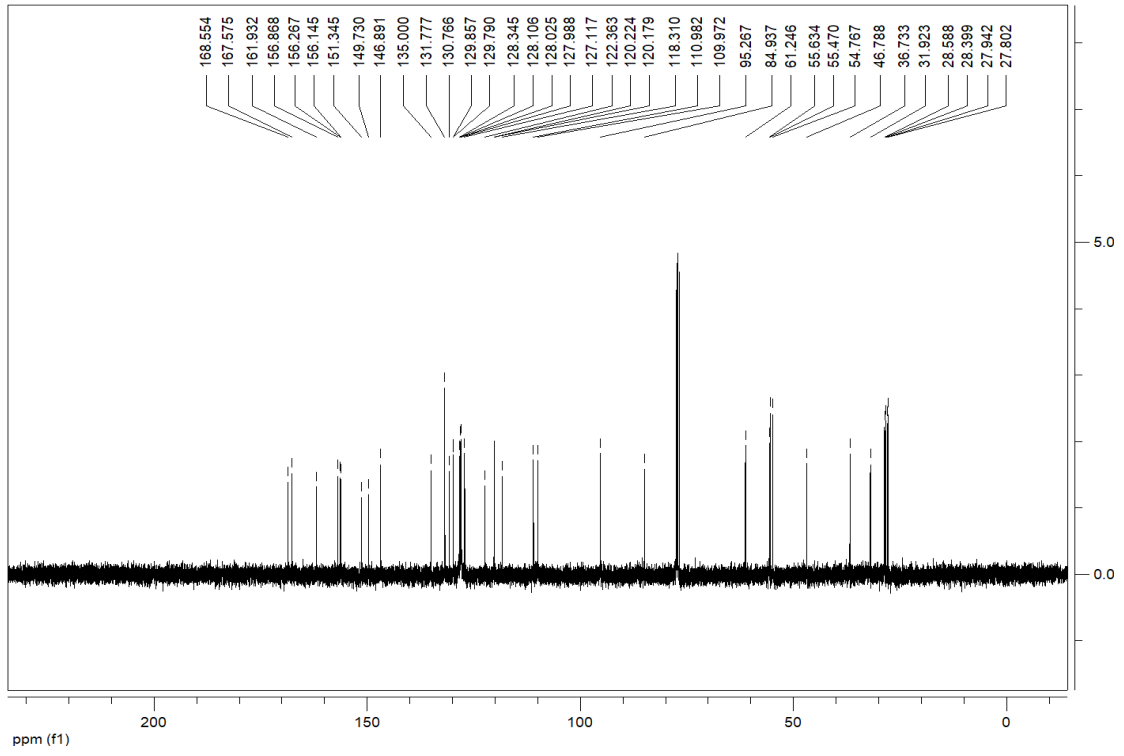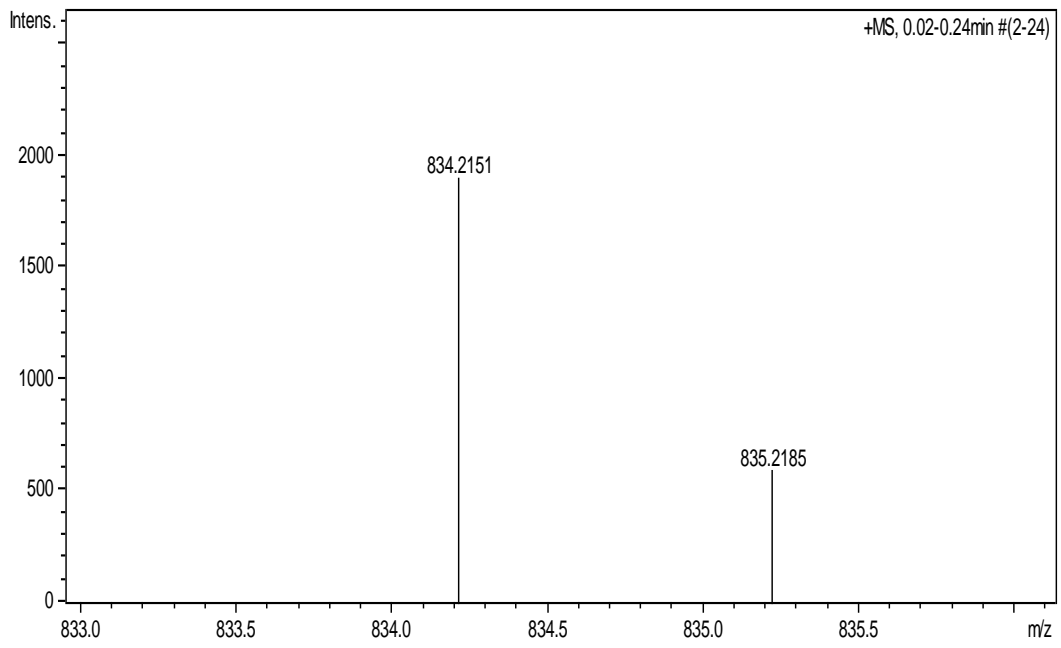

***rel*-(5*S*,5*aS*,6*S*,8*R*,9*aS*)-9-(4-chlorophenyl)-5,8-bis(2-methoxyphenyl)-1,1',3,3'-tetramethyl-6-(*p*-tolyl)-1,5,5*a*,8,9,9*a*-hexahydro-2*H*,2'*H*,6*H*-spiro[pyrido[3',2':5,6]pyrano[2,3-*d*]pyrimidine-7,5'-pyrimidine]-2,2',4,4',6'-pentaone (4*f*):**

white solid, 43%, m.p.132-135°C; <sup>1</sup>H NMR (400 MHz, CDCl<sub>3</sub>) δ: 7.35 (brs, 1H, ArH), 7.21 (t, *J* = 7.4 Hz, 1H, ArH), 7.10 -6.99 (s, *J* = 8.0 Hz, 5H, ArH), 6.91 (d, *J* = 2.4 Hz, 5H, ArH), 6.83-6.79 (m, 1H, ArH), 6.65 (d, *J* = 8.0 Hz, 1H, ArH), 6.56 (t, *J* = 8.0 Hz, 1H, ArH), 5.95 (s, 1H, CH), 5.69 (s, 1H, CH), 4.13 (s, 1H, CH), 4.09 (d, *J* = 12.8 Hz, 1H, CH), 3.89 (d, *J* = 14.4 Hz, 1H, CH), 3.84 (s, 3H, OCH<sub>3</sub>), 3.78 (s, 3H, OCH<sub>3</sub>), 3.46 (s, 3H, NCH<sub>3</sub>), 3.25 (s, 3H, NCH<sub>3</sub>), 2.93 (s, 3H, NCH<sub>3</sub>), 2.81 (s, 3H, NCH<sub>3</sub>), 2.28 (s, 3H, CH<sub>3</sub>); <sup>13</sup>C NMR (100 MHz, CDCl<sub>3</sub>) δ: 168.6, 167.6, 161.9, 156.8, 156.2, 156.1, 151.3, 149.8, 146.3, 137.8, 131.8, 130.8, 130.3, 129.8, 129.7, 128.7, 128.0, 126.7, 122.4, 120.1, 120.1, 110.9, 109.9, 95.4, 84.9, 61.2, 55.7, 55.4, 54.7, 46.4, 36.7, 31.8, 28.5, 28.3, 27.9, 27.7, 21.0; IR(KBr) ν:2954, 2837, 2097, 1747, 1707, 1682, 1649, 1492, 1462, 1419, 1380, 1285, 1243, 1172, 1138, 1108, 1090, 1051, 1026, 988, 963, 917, 895, 824, 802, 783, 763, 721, 694, cm<sup>-1</sup>; MS (*m/z*): HRMS (ESI) Calcd. for C<sub>44</sub>H<sub>43</sub>ClN<sub>5</sub>O<sub>8</sub>([M+H]<sup>+</sup>): 804.2800, found: 804.2806.

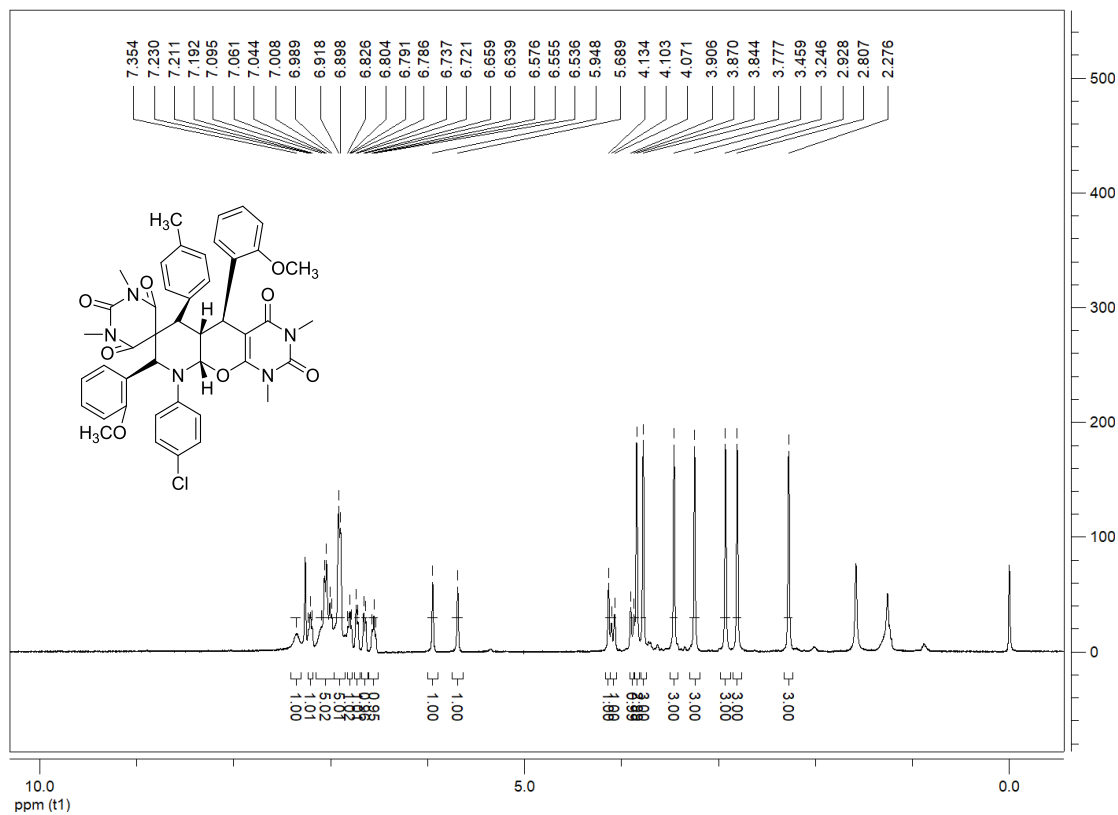

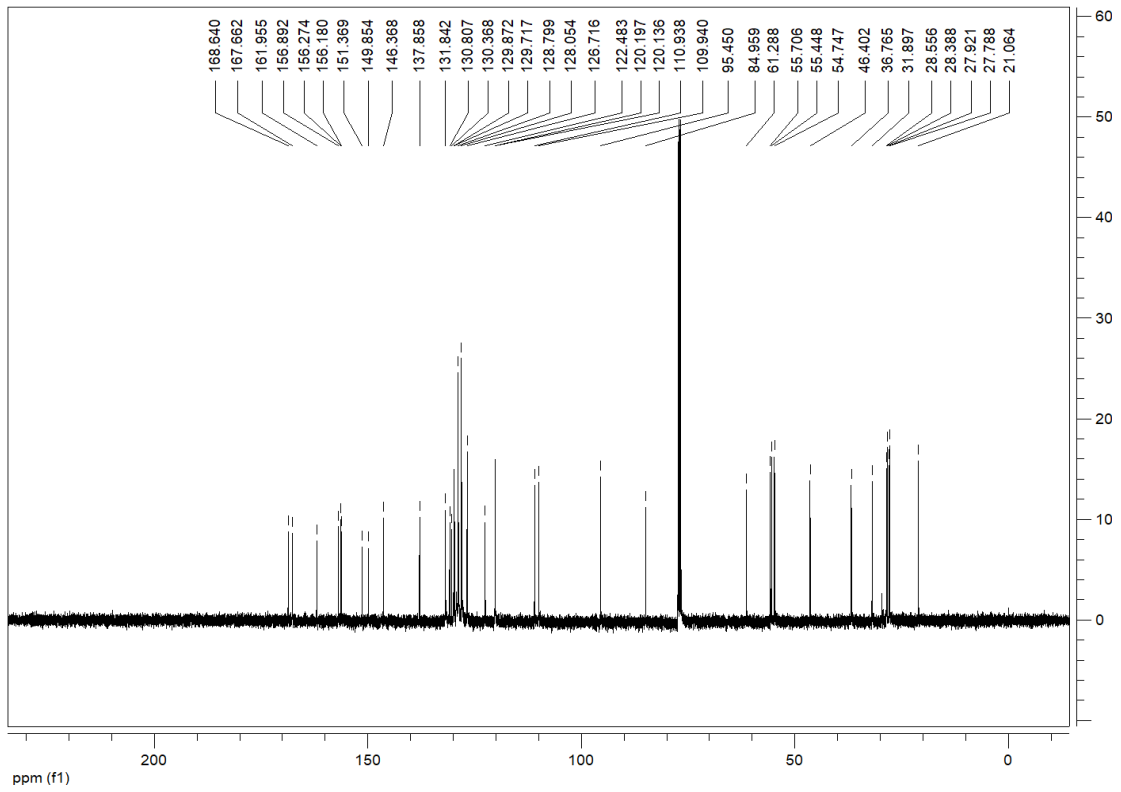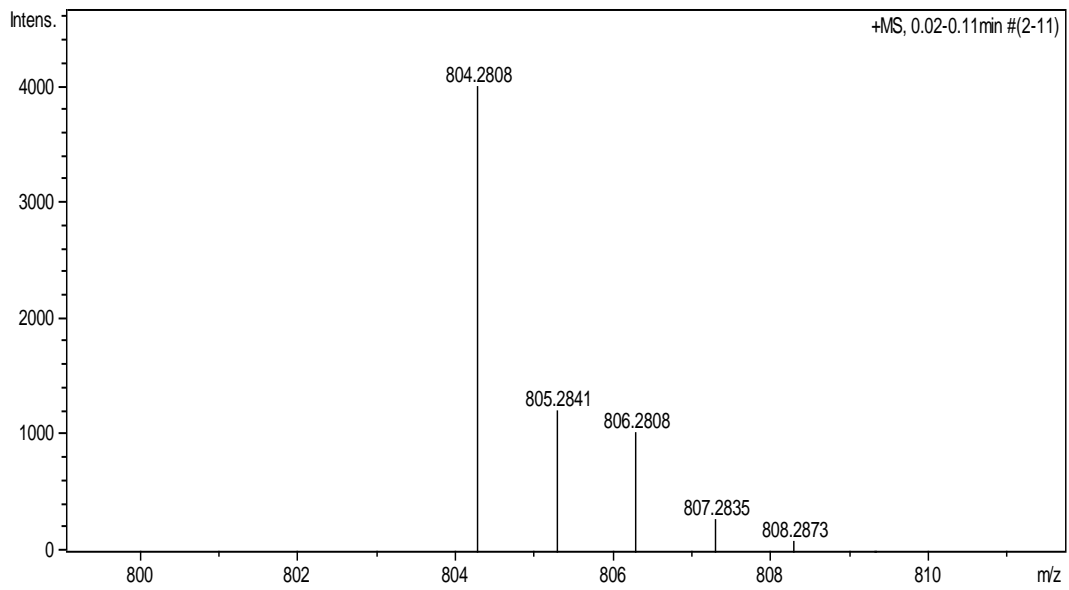

***rel*-(5S,5aS,6S,8R,9aS)-9-(4-bromophenyl)-5,8-bis(2-methoxyphenyl)-1,1',3,3'-tetramethyl-6-(*p*-tolyl)-1,5,5a,8,9,9a-hexahydro-2H,2'H,6H-spiro[pyrido[3',2':5,6]pyrano[2,3-d]pyrimidine-7,5'-pyrimidine]-2,2',4,4',6'-pentaone (4g):**

white solid, 51%, m.p.139-141 °C; <sup>1</sup>H NMR (400 MHz, CDCl<sub>3</sub>) δ: 7.35 (brs, 1H, ArH), 7.23-7.19 (m, 3H, ArH), 7.09 (brs, 1H, ArH), 7.03-6.99 (m, 2H, ArH), 6.92-6.84 (m, 5H, ArH), 6.81 (t, *J* = 7.6 Hz, 1H, ArH), 6.74-6.72 (m, 1H, CH), 6.65 (d, *J* = 8.0 Hz, 1H, ArH), 6.56 (t, *J* = 7.6 Hz, 1H, ArH), 5.94 (s, 1H, CH), 5.69 (d, *J* = 2.4 Hz, 1H, CH), 4.13 (s, 1H, CH), 4.11-4.06 (m, 1H, CH), 3.89 (d, *J* = 12.8 Hz, 1H, CH), 3.84 (s, 3H, OCH<sub>3</sub>), 3.78 (s, 3H, OCH<sub>3</sub>), 3.46 (s, 3H, NCH<sub>3</sub>), 3.25 (s, 3H, NCH<sub>3</sub>), 2.93 (s, 3H, NCH<sub>3</sub>), 2.80 (s, 3H, NCH<sub>3</sub>), 2.28 (s, 3H, CH<sub>3</sub>); <sup>13</sup>C NMR (100 MHz, CDCl<sub>3</sub>) δ: 168.6, 167.6, 161.9, 156.8, 156.2, 156.1, 151.3, 149.8, 146.9, 137.8, 131.8, 131.7, 130.7, 129.8, 129.7, 128.0, 127.0, 122.4, 120.2, 120.1, 118.2, 110.9, 109.9, 95.3, 84.9, 61.2, 55.6, 55.4, 54.7, 46.3, 36.7, 31.8, 28.5, 28.4, 27.9, 27.7, 21.0; IR(KBr) ν: 2953, 2839, 1747, 1705, 1682, 1650, 1600, 1587, 1490, 1463, 1417, 1379, 1287, 1246, 1172, 1138, 1109, 1052, 1027, 987, 916, 895, 824, 800, 782, 756, 720, 664 cm<sup>-1</sup>; MS (*m/z*): HRMS (ESI) Calcd. for C<sub>44</sub>H<sub>43</sub>BrN<sub>5</sub>O<sub>8</sub>([M+H]<sup>+</sup>): 848.2295, found: 848.2317.

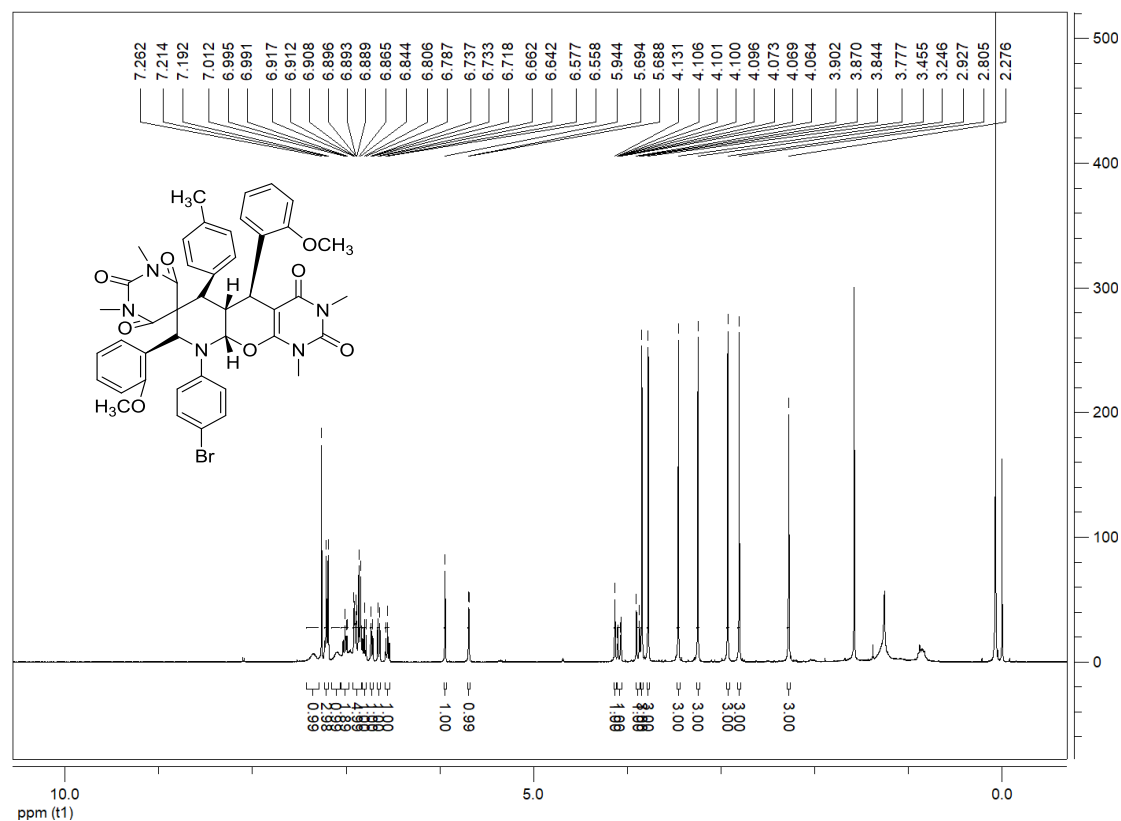

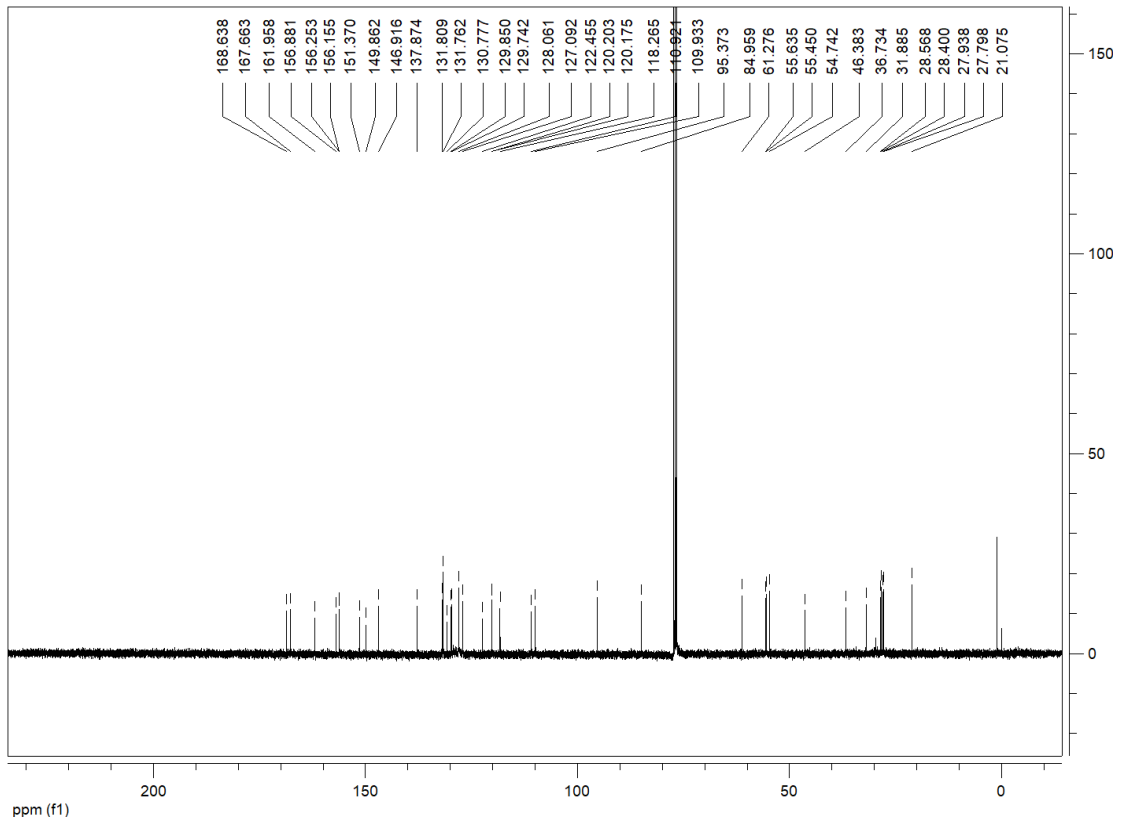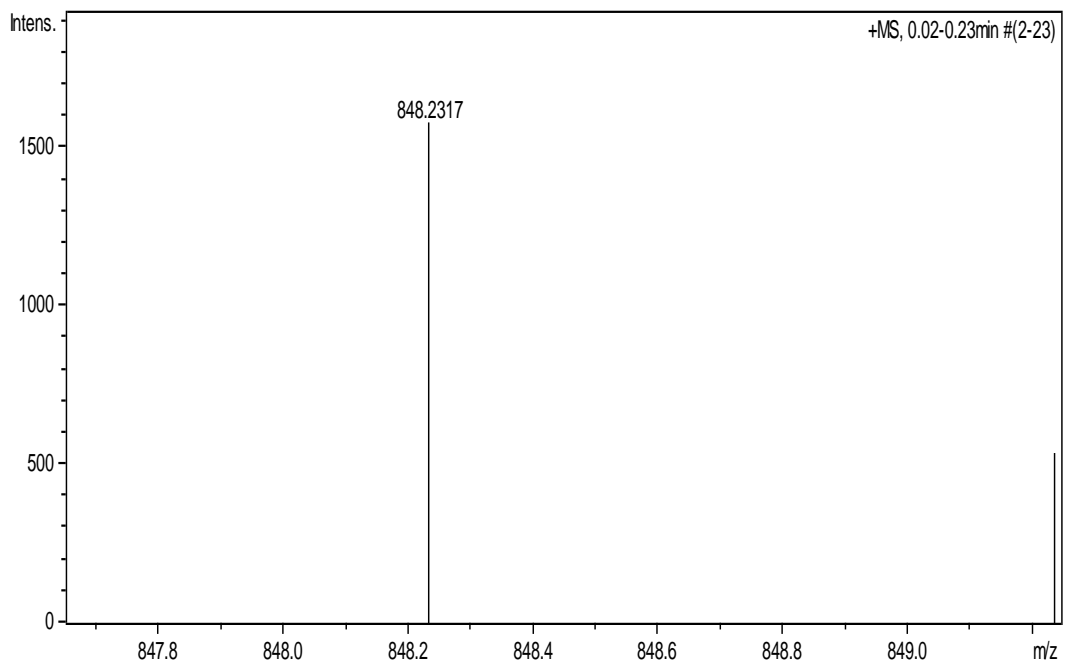



***rel*-(5*S*,5*aS*,6*S*,8*R*,9*aS*)-6-(4-fluorophenyl)-5,8-bis(2-methoxyphenyl)-1,1',3,3'-tetramethyl-9-phenyl-1,5,5*a*,8,9,9*a*-hexahydro-2*H*,2'*H*,6*H*-spiro[pyrido[3',2':5,6]pyrano[2,3-*d*]pyrimidine-7,5'-pyrimidine]-2,2',4,4',6'-pentaone (4h):**

white solid, 38%, m.p.131-133 °C; <sup>1</sup>H NMR (400 MHz, CDCl<sub>3</sub>) δ: 7.52 (brs, 1H, ArH), 7.24-7.20 (m, 1H, ArH), 7.08 (t, *J* = 7.6 Hz, 2H, ArH), 7.00-6.90 (m, 9H, ArH), 6.81 (t, *J* = 7.4 Hz, 1H, ArH), 6.75-6.73 (m, 1H, ArH), 6.64 (d, *J* = 7.6 Hz, 1H, ArH), 6.53 (t, *J* = 7.6 Hz, 1H, ArH), 5.99 (s, 1H, CH), 5.76 (d, *J* = 2.8 Hz, 1H, CH), 4.11-4.09 (m, 2H, CH), 4.98 (d, *J* = 13.2 Hz, 1H, CH), 3.85 (s, 3H, OCH<sub>3</sub>), 3.79 (s, 3H, OCH<sub>3</sub>), 3.47 (s, 3H, NCH<sub>3</sub>), 3.25 (s, 3H, NCH<sub>3</sub>), 2.94 (s, 3H, NCH<sub>3</sub>), 2.81 (s, 3H, NCH<sub>3</sub>); <sup>13</sup>C NMR (100 MHz, CDCl<sub>3</sub>) δ: 168.6, 167.6, 161.9, 156.8, 156.3, 156.2, 151.3, 149.6, 147.6, 131.2, 131.2, 130.7, 129.8, 129.6, 128.6, 128.0, 125.5, 125.0, 122.5, 120.2, 119.9, 111.0, 109.8, 95.5, 84.7, 61.4, 55.9, 55.4, 54.8, 45.7, 37.0, 31.8, 28.5, 28.4, 27.9, 27.8; IR(KBr) ν:2956, 2839, 1710, 1680, 1656, 1599, 1510, 1491, 1458, 1418, 1376, 1243, 1219, 1163, 1110, 1028, 987, 916, 837, 785, 754, 720, 701, 648 cm<sup>-1</sup> ; MS (*m/z*): HRMS (ESI) Calcd. for C<sub>43</sub>H<sub>41</sub>FN<sub>5</sub>O<sub>8</sub>([M+H]<sup>+</sup>): 774.2939, found: 774.2953.

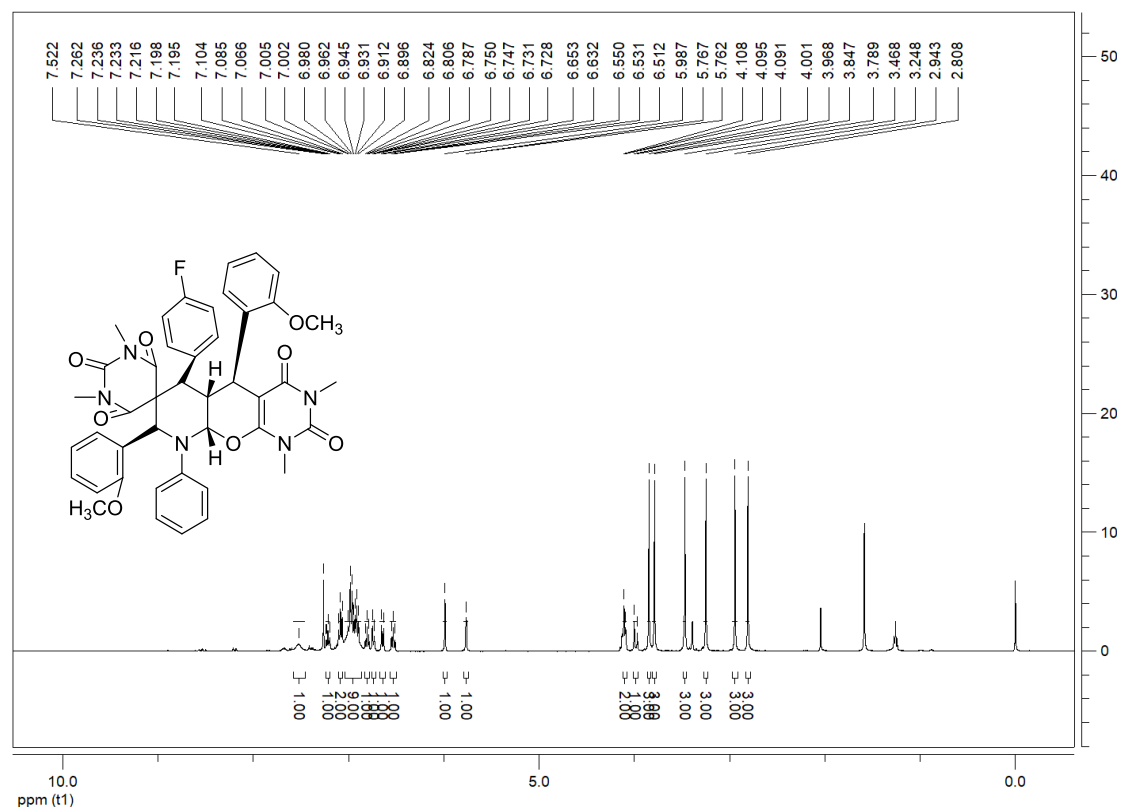

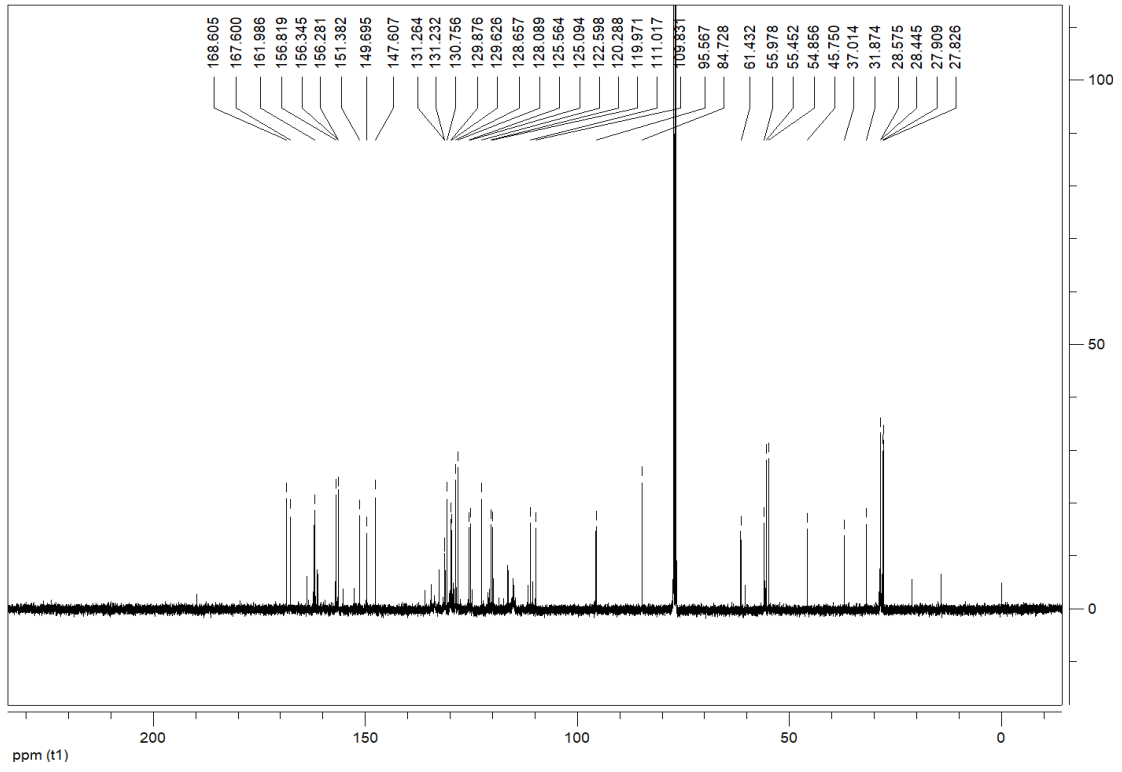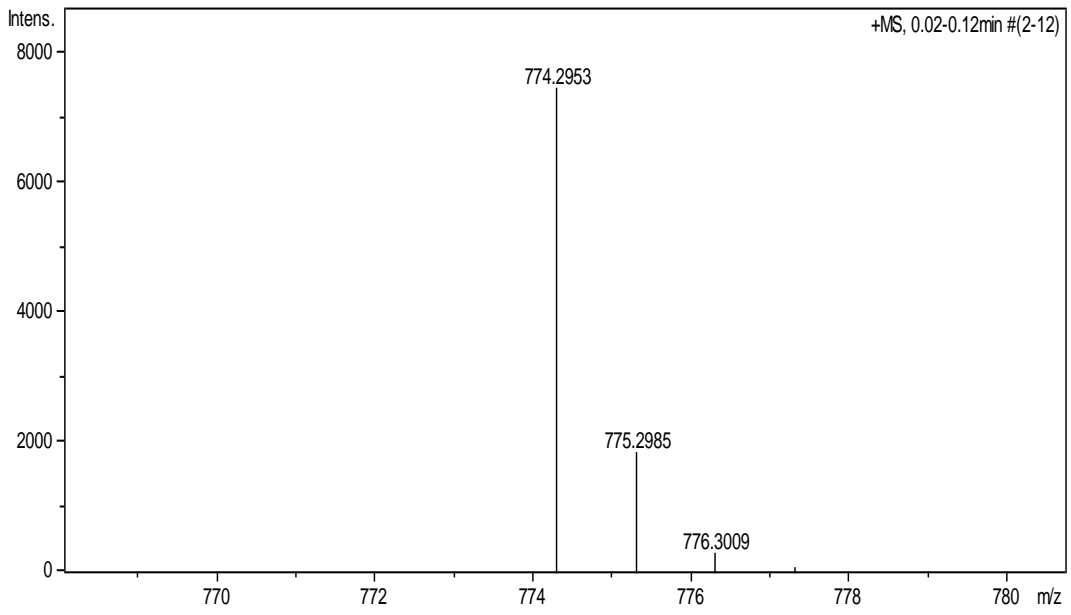

***rel*-(5*S*,5*aS*,6*S*,8*R*,9*aS*)-6-(4-fluorophenyl)-5,8-bis(2-methoxyphenyl)-1,1',3,3'-tetramethyl-9-(*p*-tolyl)-1,5,5*a*,8,9,9*a*-hexahydro-2*H*,2'*H*,6*H*-spiro[pyrido[3',2':5,6]pyrano[2,3-*d*]pyrimidine-7,5'-pyrimidine]-2,2',4,4',6'-pentaone (4i):**

white solid, 43%, m.p.146-148 °C; <sup>1</sup>H NMR (400 MHz, CDCl<sub>3</sub>) δ: 7.52 (brs, 1H, ArH), 7.23-7.17 (m, 1H, ArH), 7.04-6.97 (m, 3H, ArH), 6.93-6.85 (m, 7H, ArH), 6.79 (t, *J* = 7.4 Hz, 1H, ArH), 6.74-6.71 (m, 1H, ArH), 6.64 (d, *J* = 7.6 Hz, 1H, ArH), 6.55 (t, *J* = 7.6 Hz, 1H, ArH), 5.96 (s, 1H, CH), 5.72 (d, *J* = 2.4 Hz, 1H, CH), 4.11-4.07 (m, 2H, CH), 3.97 (d, *J* = 13.2 Hz, 1H, CH), 3.84 (s, 3H, OCH<sub>3</sub>), 3.78 (s, 3H, OCH<sub>3</sub>), 3.48 (s, 3H, NCH<sub>3</sub>), 3.25 (s, 3H, NCH<sub>3</sub>), 2.94 (s, 3H, NCH<sub>3</sub>), 2.80 (s, 3H, NCH<sub>3</sub>), 2.16 (s, 3H, CH<sub>3</sub>); <sup>13</sup>C NMR (100 MHz, CDCl<sub>3</sub>) δ: 168.6, 167.5, 161.9, 156.8, 156.4, 156.2, 151.4, 149.7, 145.0, 134.6, 131.3, 131.2, 130.7, 129.9, 129.5, 129.3, 128.0, 128.0, 125.3, 122.7, 120.2, 119.9, 110.9, 109.7, 95.7, 84.7, 61.4, 56.0, 55.4, 54.8, 45.7, 36.9, 31.8, 28.6, 28.4, 27.9, 27.8, 20.7; IR(KBr) ν: 2955, 2838, 1709, 1678, 1657, 1601, 1509, 1492, 1463, 1419, 1377, 1292, 1246, 1217, 1199, 1173, 1138, 1111, 1037, 987, 914, 892, 837, 810, 781, 759, 675, 645, cm<sup>-1</sup>; MS (*m/z*): HRMS (ESI) Calcd. for C<sub>44</sub>H<sub>43</sub>FN<sub>5</sub>O<sub>8</sub>([M+H]<sup>+</sup>): 788.3096, found: 788.3111.

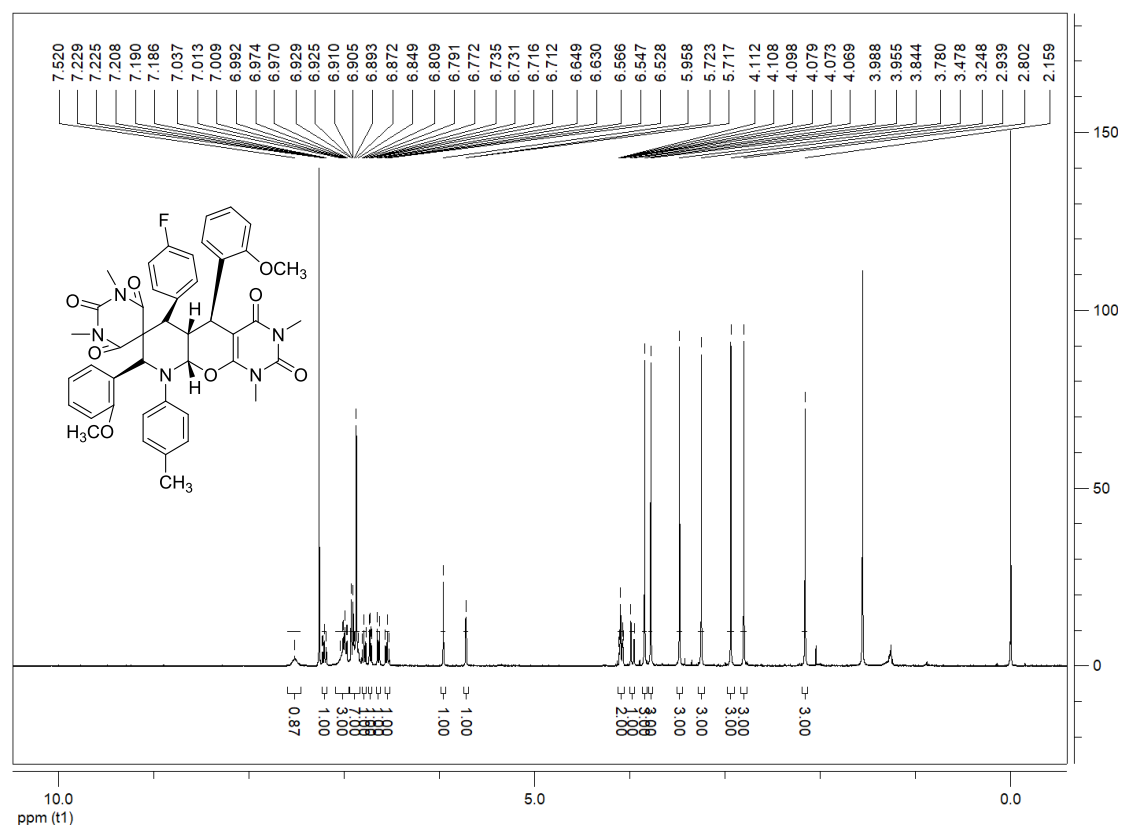

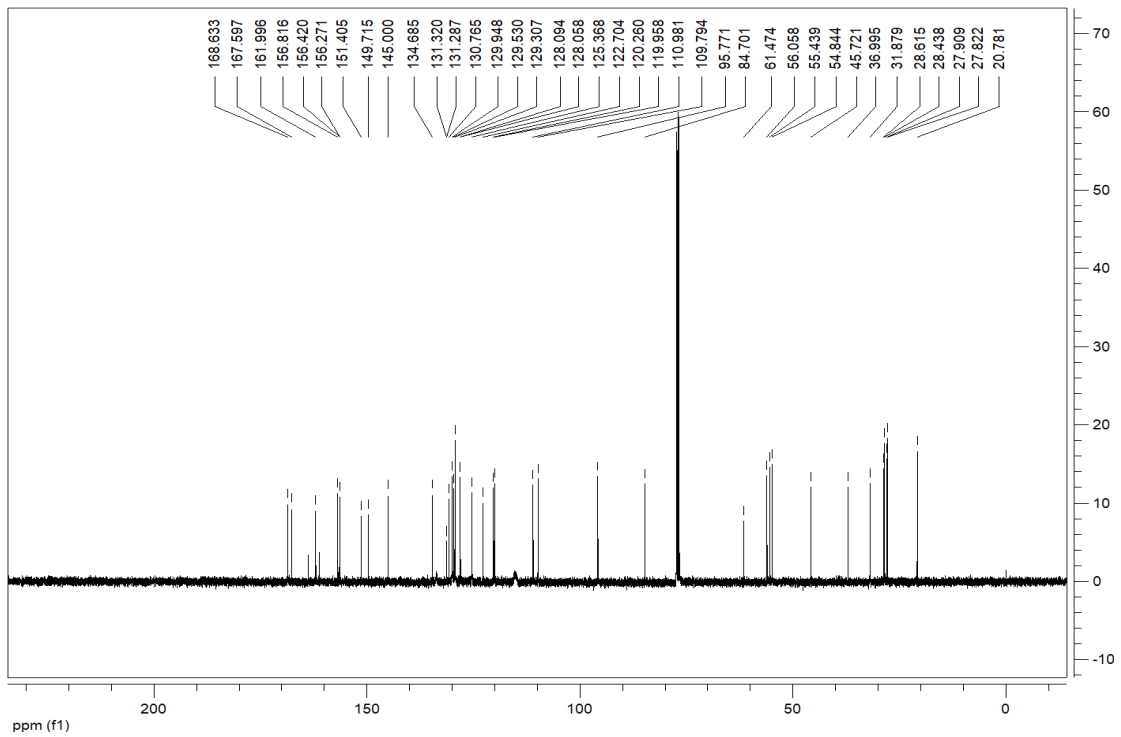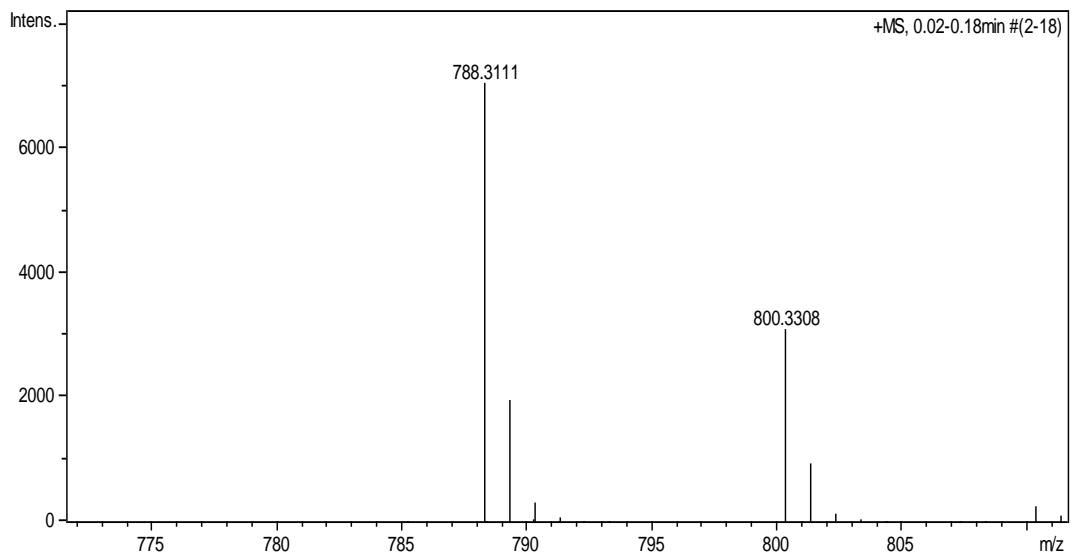

***rel*-(5S,5aS,6S,8R,9aS)-9-(4-bromophenyl)-6-(4-fluorophenyl)-5,8-bis(2-methoxyphenyl)-1,1',3,3'-tetramethyl-1,5,5a,8,9,9a-hexahydro-2H,2'H,6H-spiro[pyrido[3',2':5,6]pyrano[2,3-d]pyrimidine-7,5'-pyrimidine]-2,2',4,4',6'(1'H,3H,3'H)-pentaone (4j):**

white solid, 52%, m.p.156-157°C; <sup>1</sup>H NMR (400 MHz, CDCl<sub>3</sub>) δ: 7.51 (brs, 1H, ArH), 7.22-7.20 (m, 3H, ArH), 7.05 -7.00 (m, 3H, ArH), 6.93 (d, *J* = 8.0 Hz, 1H, ArH), 6.89-6.80 (m, 5H, ArH), 6.74-6.72 (m, 1H, ArH), 6.66 (d, *J* = 8.0 Hz, 1H, ArH), 6.57 (t, *J* = 7.4 Hz, 1H, ArH), 5.92 (s, 1H, CH), 5.68 (d, *J* = 2.4 Hz, 1H, CH), 4.10-4.06 (m, 2H, CH), 3.95 (d, *J* = 12.8 Hz, 1H, CH), 3.84 (s, 3H, OCH<sub>3</sub>), 3.78 (s, 3H, OCH<sub>3</sub>), 3.46 (s, 3H, NCH<sub>3</sub>), 3.25 (s, 3H, NCH<sub>3</sub>), 2.94 (s, 3H, NCH<sub>3</sub>), 2.81 (s, 3H, NCH<sub>3</sub>); <sup>13</sup>C NMR (100 MHz, CDCl<sub>3</sub>) δ: 168.4, 167.5, 161.9, 156.8, 156.2, 156.1, 151.3, 149.5, 146.8, 131.7, 131.0, 130.6, 129.8, 129.7, 128.1, 128.0, 127.1, 122.2, 120.3, 120.2, 118.4, 111.0, 109.9, 95.1, 84.7, 61.2, 55.7, 55.4, 54.8, 45.7, 36.8, 31.8, 28.5, 28.4, 27.9, 27.8; IR(KBr) ν:1376, 1167, 1243, 3009, 2956, 2838, 1711, 1679, 1656, 1601, 1586, 1509, 1491, 1462, 1419, 1376, 1292, 1245, 1216, 1198, 1170, 1139, 1111, 1098, 1070, 1033, 1008, 987, 963, 915, 892, 837, 807, 783.28, 762.95, 719.31, 689.44, 665.41, 651.12, 601.07cm<sup>-1</sup>; MS (*m/z*): HRMS (ESI) Calcd. for C<sub>43</sub>H<sub>40</sub>BrFN<sub>5</sub>O<sub>8</sub>([M+H]<sup>+</sup>): 852.2044, found: 852.2055.

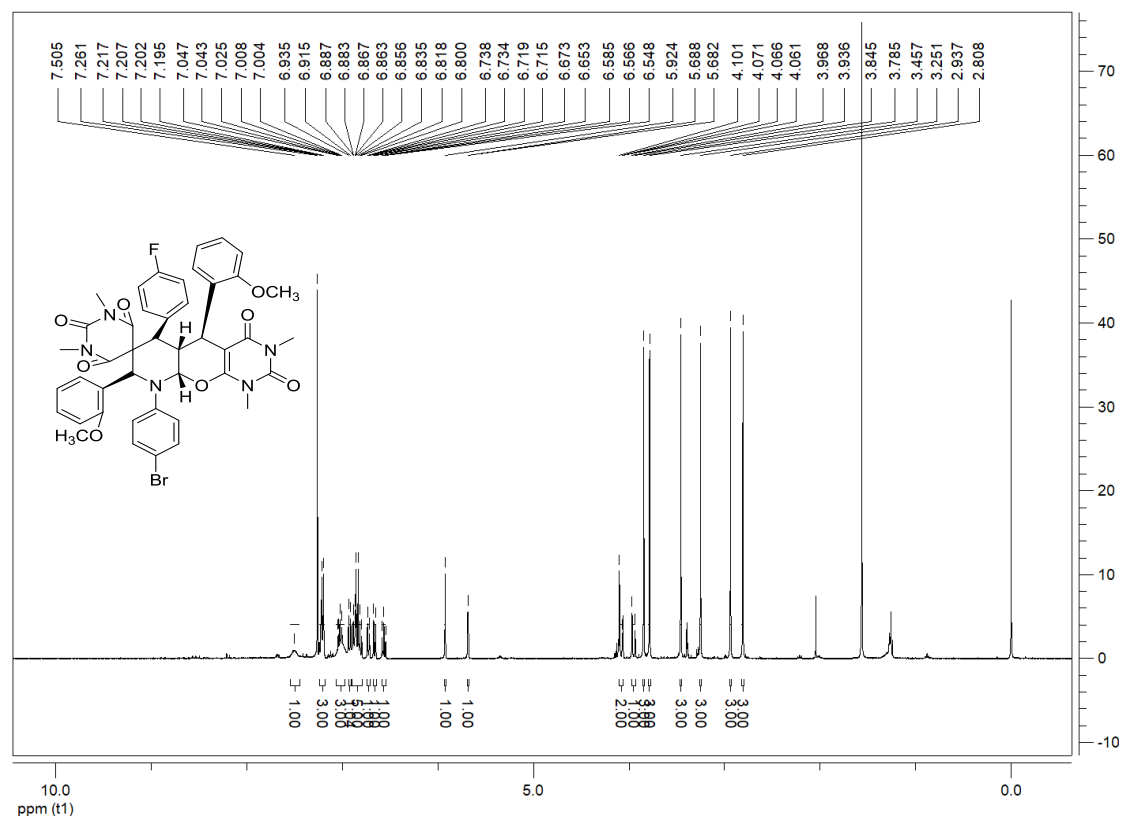

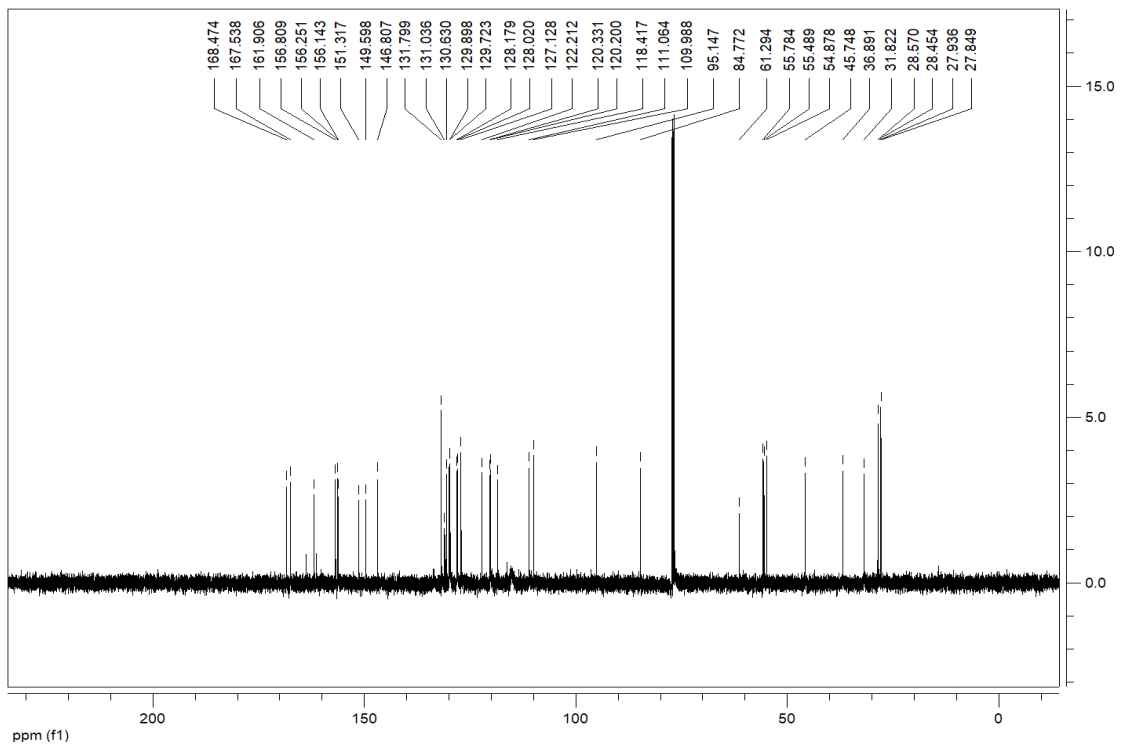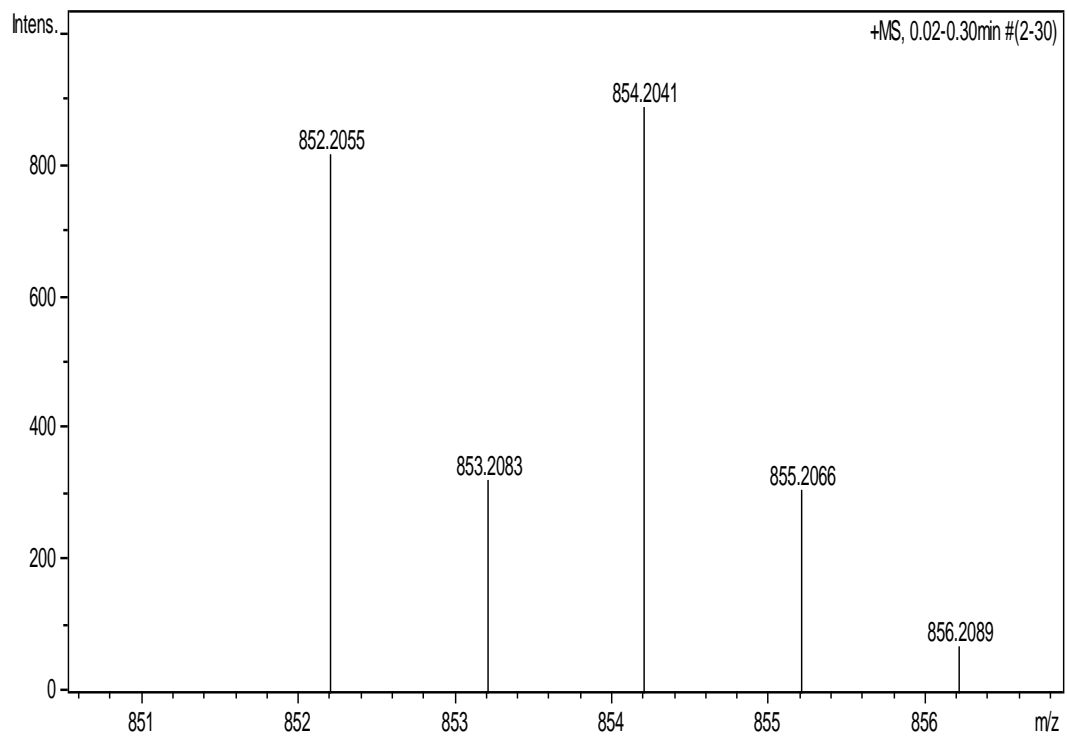

***rel*-(5*S*,5*aS*,6*S*,8*R*,9*aS*)-6-(4-chlorophenyl)-5,8-bis(2-methoxyphenyl)-1,1',3,3'-tetramethyl-9-(*p*-tolyl)-1,5,5*a*,8,9,9*a*-hexahydro-2*H*,2'*H*,6*H*-spiro[pyrido[3',2':5,6]pyrano[2,3-*d*]pyrimidine-7,5'-pyrimidine]-2,2',4,4',6'-pentaone (4k):**

white solid, 34%, m.p.129-131 °C; <sup>1</sup>H NMR (400 MHz, CDCl<sub>3</sub>) δ: 7.49 (brs, 1H, ArH), 7.31 (brs, 1H, ArH), 7.23 -7.19 (m, 2H, ArH), 7.02-6.97 (m, 2H, ArH), 6.92-6.87 (m, 6H, ArH), 6.79 (t, *J* = 7.4 Hz, 1H, ArH), 6.72 (t, *J* = 7.2 Hz, 1H, ArH), 6.64 (d, *J* = 8.4 Hz, 1H, ArH), 6.55 (t, *J* = 7.4 Hz, 1H, ArH), 5.95 (s, 1H, CH), 5.71 (d, *J* = 2.0 Hz, 1H, CH), 4.10-4.08 (m, 2H, CH), 3.97 (d, *J* = 12.8 Hz, 1H, CH), 3.85 (s, 3H, OCH<sub>3</sub>), 3.78 (s, 3H, OCH<sub>3</sub>), 3.48 (s, 3H, NCH<sub>3</sub>), 3.25 (s, 3H, NCH<sub>3</sub>), 2.94 (s, 3H, NCH<sub>3</sub>), 2.81 (s, 3H, NCH<sub>3</sub>), 2.16 (s, 3H, CH<sub>3</sub>); <sup>13</sup>C NMR (100 MHz, CDCl<sub>3</sub>) δ: 234.3, 168.5, 167.5, 161.9, 156.7, 156.3, 156.2, 151.3, 149.6, 144.9, 134.7, 134.1, 134.0, 130.6, 129.8, 129.5, 129.3, 128.0, 125.3, 122.6, 120.2, 119.9, 110.9, 109.7, 95.7, 84.6, 61.3, 56.1, 55.4, 54.8, 45.7, 36.8, 31.9, 28.6, 28.4, 27.9, 27.8, 20.7, ; IR(KBr) ν:2957, 2350, 2324, 1704, 1682, 1646, 1586, 1512, 1491, 1463, 1419, 1379, 1287, 1242, 1198, 1168, 1115, 1025, 987, 914, 820, 758, 719, 697, 631 cm<sup>-1</sup>; MS (*m/z*): HRMS (ESI) Calcd. for C<sub>44</sub>H<sub>43</sub>ClN<sub>5</sub>O<sub>8</sub>([M+H]<sup>+</sup>): 804.2800, found: 804.2809.

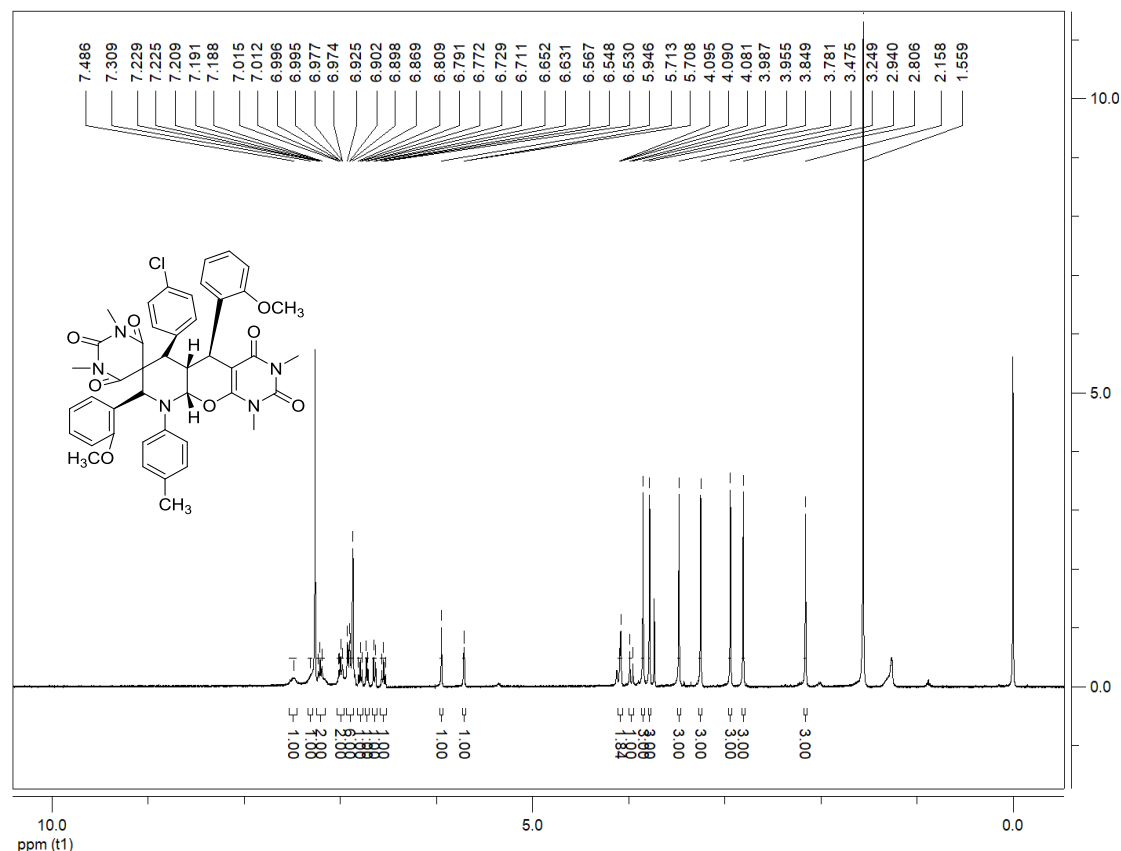

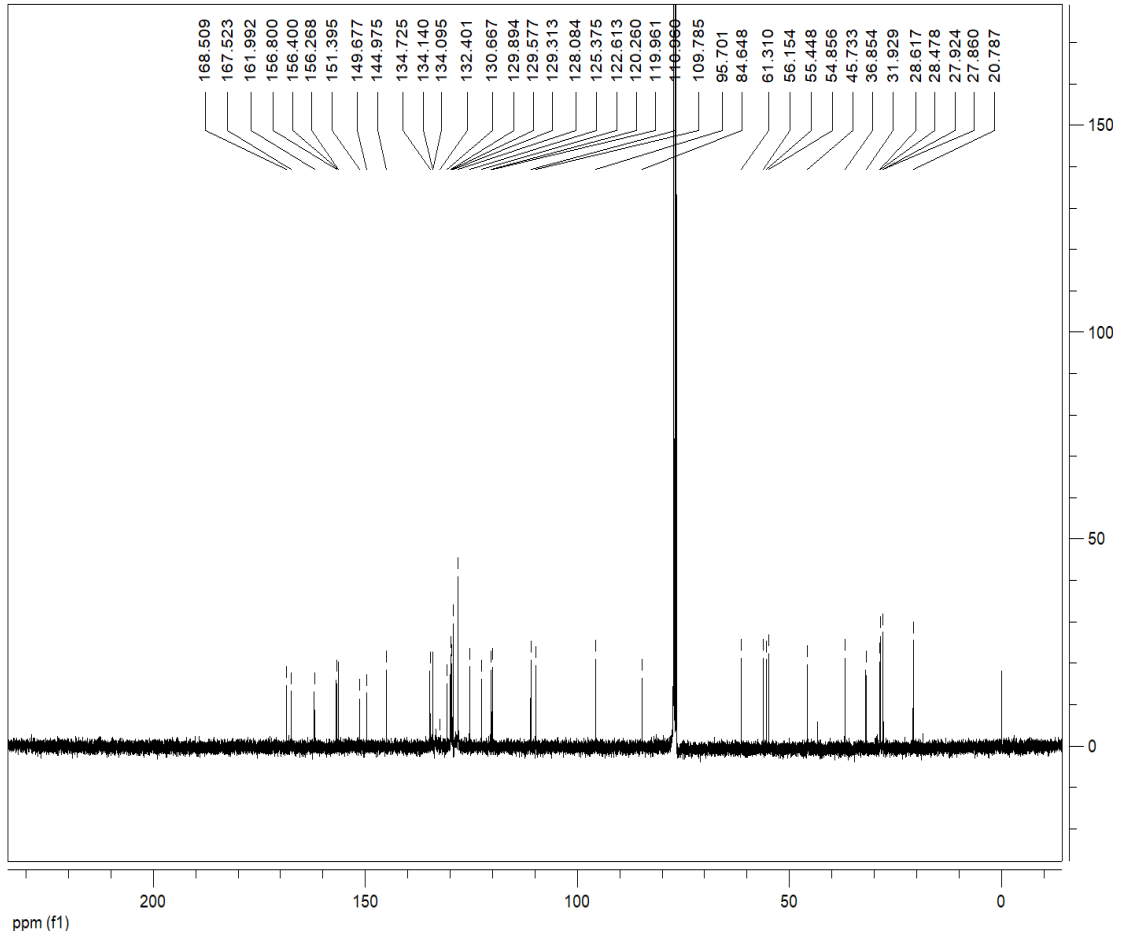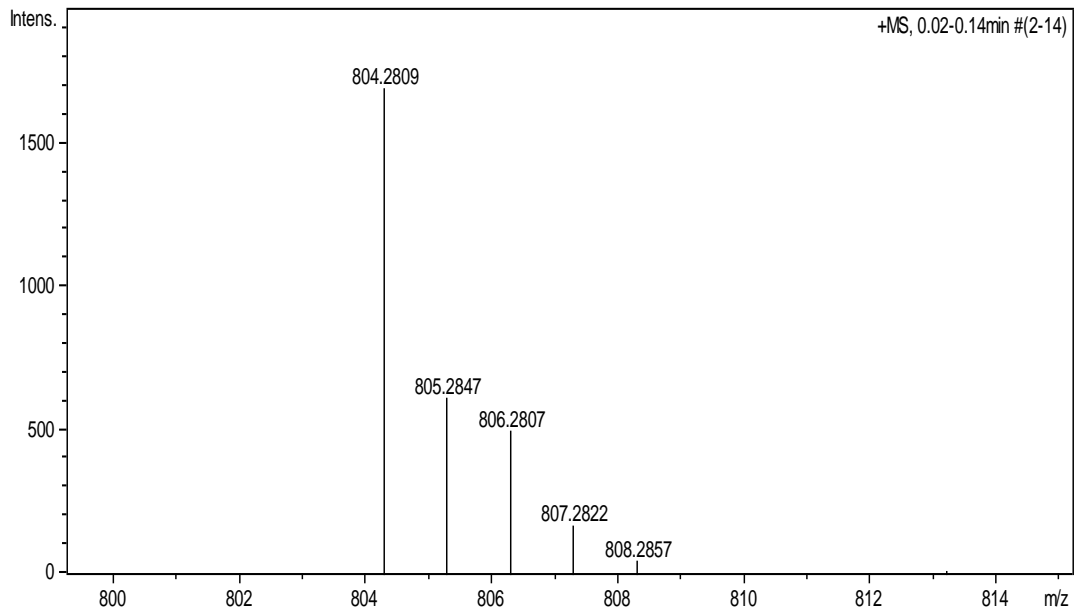





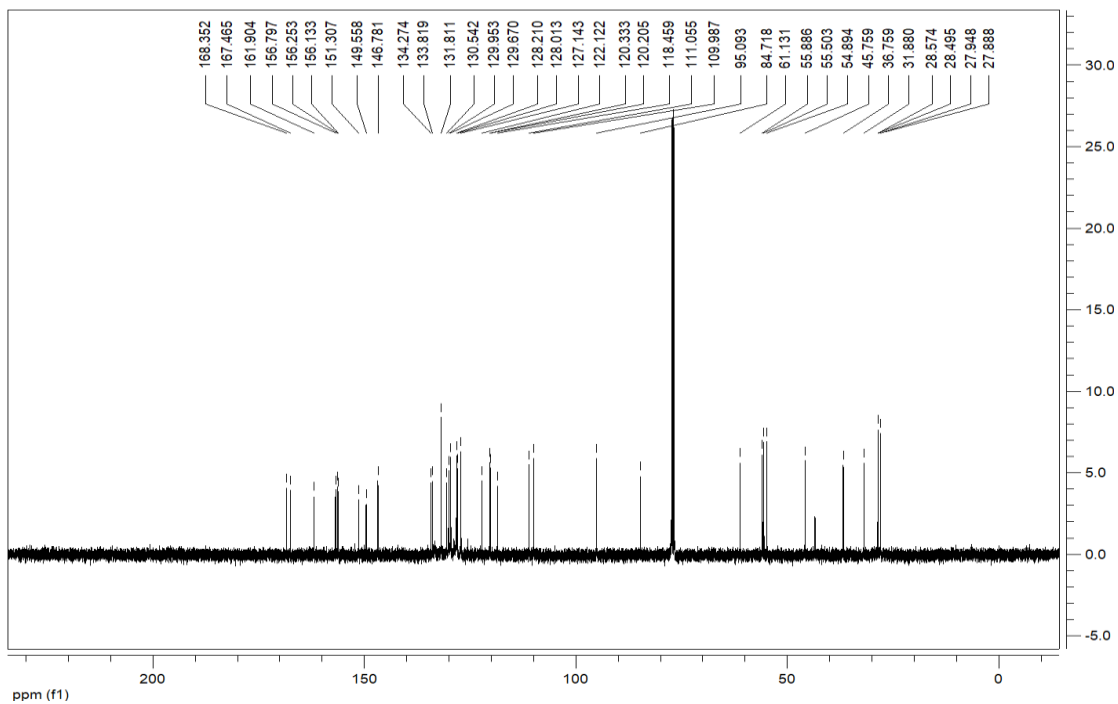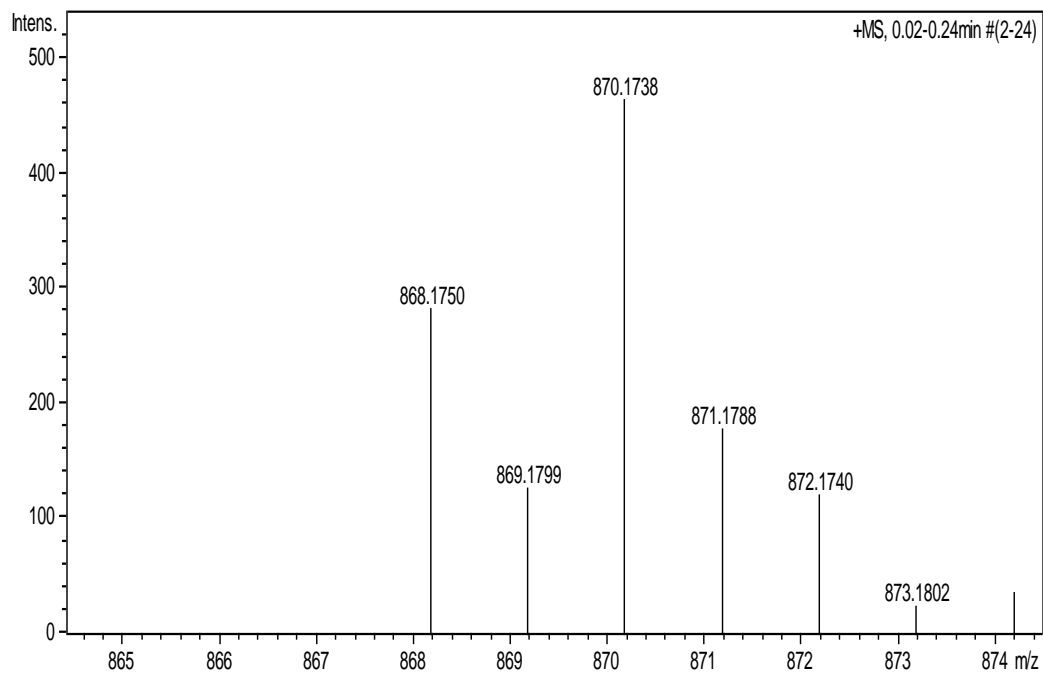

***rel*-(5S,5aS,6S,8R,9aS)-5,8,9-tris(4-methoxyphenyl)-1,1',3,3'-tetramethyl-6-(*p*-tolyl)-1,5,5a,8,9,9a-hexahydro-2H,2'H,6H-spiro[pyrido[3',2':5,6]pyrano[2,3-d]pyrimidine-7,5'-pyrimidine]-2,2',4,4',6'-pentaone (4m):**

yellow solid, 46%, m.p.115-116°C; <sup>1</sup>H NMR (400 MHz, CDCl<sub>3</sub>) δ: 7.24-7.17 (m, 2H, ArH), 6.98 (t, *J* = 8.2 Hz, 5H, ArH), 6.88-6.81 (m, 5H, ArH), 6.65 (d, *J* = 8.4 Hz, 2H, ArH), 6.55 (d, *J* = 8.4 Hz, 1H, ArH), 6.47 (t, *J* = 8.4 Hz, 1H, ArH), 5.68 (d, *J* = 2.4 Hz, 1H, CH), 5.51 (s, 1H, CH), 3.93 (d, *J* = 12.4 Hz, 1H, CH), 3.78-3.75 (m, 5H, OCH<sub>3</sub>, CH), 3.69 (s, 3H, OCH<sub>3</sub>), 3.62 (s, 3H, OCH<sub>3</sub>), 3.48 (s, 3H, NCH<sub>3</sub>), 3.23 (s, 3H, NCH<sub>3</sub>), 2.95 (s, 3H, NCH<sub>3</sub>), 2.83 (s, 3H, NCH<sub>3</sub>), 2.29 (s, 3H, CH<sub>3</sub>); <sup>13</sup>C NMR (100 MHz, CDCl<sub>3</sub>) δ: 170.3, 166.9, 162.2, 159.1, 158.3, 156.8, 155.8, 151.3, 149.5, 139.9, 138.3, 135.9, 132.2, 131.0, 129.9, 129.5, 128.1, 127.7, 126.5, 125.7, 114.2, 113.9, 113.7, 112.6, 94.9, 85.3, 63.7, 62.6, 55.2, 55.2, 54.9, 46.8, 40.0, 36.4, 28.6, 28.3, 27.8, 27.8, 21.0; IR(KBr) ν: 2955, 2836, 1747, 1703, 1679, 1647, 1611, 1584, 1511, 1456, 1423, 1381, 1343, 1294, 1244, 1175, 1112, 1034, 989, 918, 894, 863, 820, 779, 755, 726, 674, 627, cm<sup>-1</sup>; MS (*m/z*): HRMS (ESI) Calcd. for C<sub>45</sub>H<sub>46</sub>N<sub>5</sub>O<sub>9</sub>([M+H]<sup>+</sup>): 800.3296, found: 800.3304.

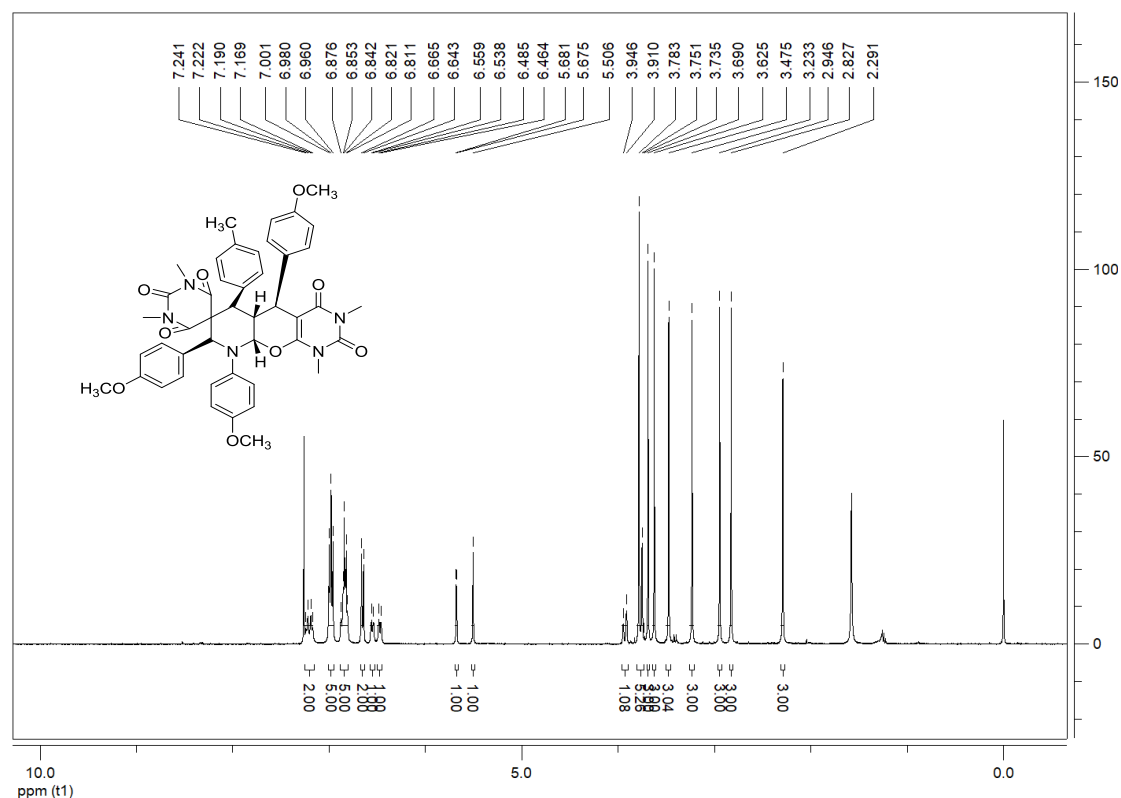

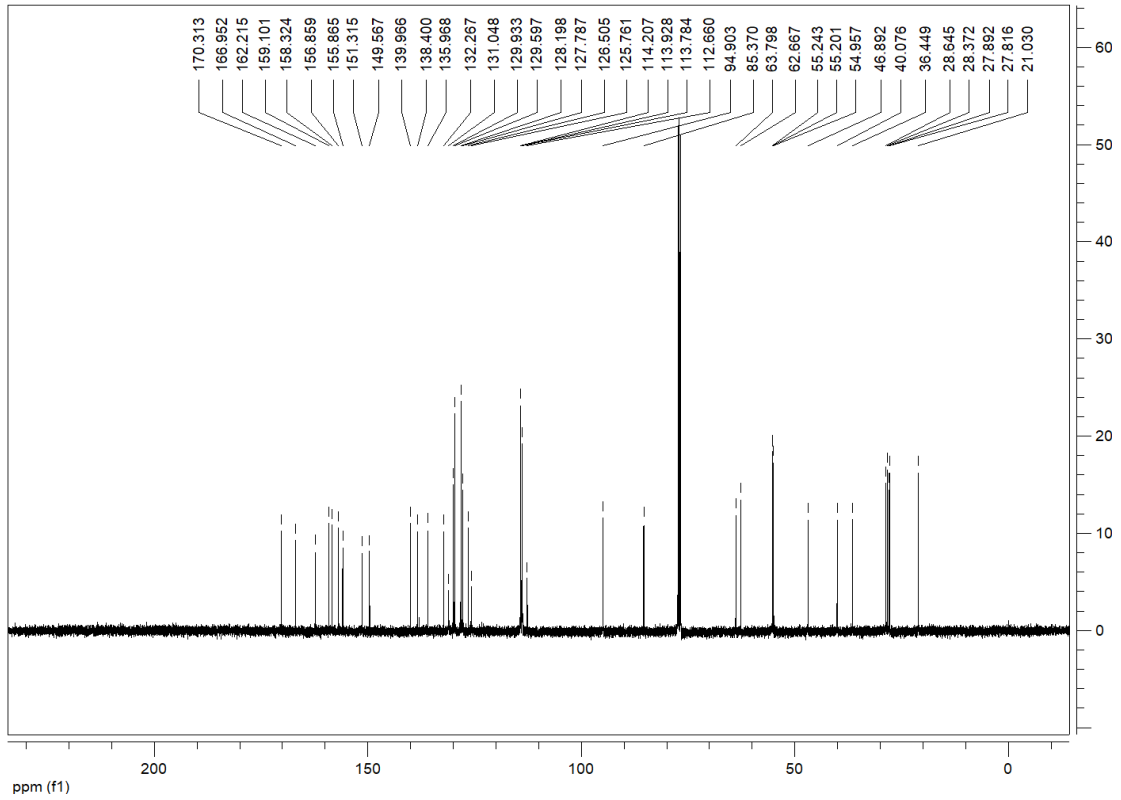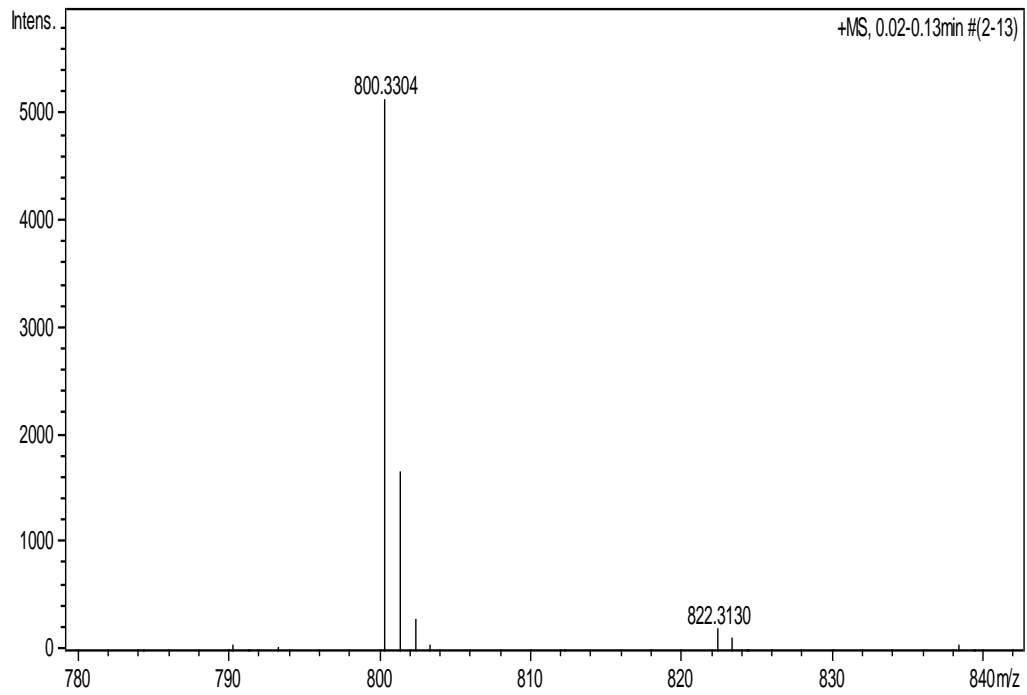

***rel*-(5*S*,5*aS*,6*S*,8*R*,9*aS*)-9-(4-bromophenyl)-5,8-bis(4-methoxyphenyl)-1,1',3,3'-tetramethyl-6-(*p*-tolyl)-1,5,5*a*,8,9,9*a*-hexahydro-2*H*,2'*H*,6*H*-spiro[pyrido[3',2':5,6]pyrano[2,3-*d*]pyrimidine-7,5'-pyrimidine]-2,2',4,4',6'-pentaone (4n):**

yellow solid, 32%, m.p.112-115 °C; <sup>1</sup>H NMR (400 MHz, CDCl<sub>3</sub>) δ: 7.20 (s, 2H, ArH), 6.98-6.76 (m, 11H, ArH), 6.77 (d, *J* = 7.6 Hz, 1H, ArH), 6.60-6.57 (m, 1H, ArH), 6.48 (d, *J* = 8.4 Hz, 1H, ArH), 5.70 (s, 1H, CH), 5.52 (s, 1H, CH), 3.94-3.88 (m, 2H, CH), 3.79 (s, 3H, OCH<sub>3</sub>), 3.76 (s, 1H, CH), 3.64 (s, 3H, OCH<sub>3</sub>), 3.43 (s, 3H, NCH<sub>3</sub>), 3.23 (s, 3H, NCH<sub>3</sub>), 2.95 (s, 3H, NCH<sub>3</sub>), 2.82 (s, 3H, NCH<sub>3</sub>), 2.29 (s, 3H, CH<sub>3</sub>); <sup>13</sup>C NMR (100 MHz, CDCl<sub>3</sub>) δ: 170.2, 166.8, 162.1, 159.2, 158.4, 155.5, 151.2, 149.4, 146.4, 138.5, 137.9, 135.8, 131.9, 131.8, 128.1, 128.0, 126.0, 118.5, 114.2, 114.1, 113.9, 94.2, 85.4, 63.1, 62.5, 55.2, 54.9, 46.9, 39.9, 36.3, 28.5, 28.4, 27.9, 27.8, 21.0; IR (KBr) ν: 2954, 2837, 1747, 1706, 1680, 1650, 1611, 1583, 1511, 1488, 1459, 1421, 1381, 1302, 1251, 1168, 1084, 1033, 987, 916, 895, 822, 789, 776, 756, 719, 665 cm<sup>-1</sup>; MS (*m/z*): HRMS (ESI) Calcd. for C<sub>44</sub>H<sub>43</sub>BrN<sub>5</sub>O<sub>8</sub> ([M+H]<sup>+</sup>): 848.2295, found: 848.2298.

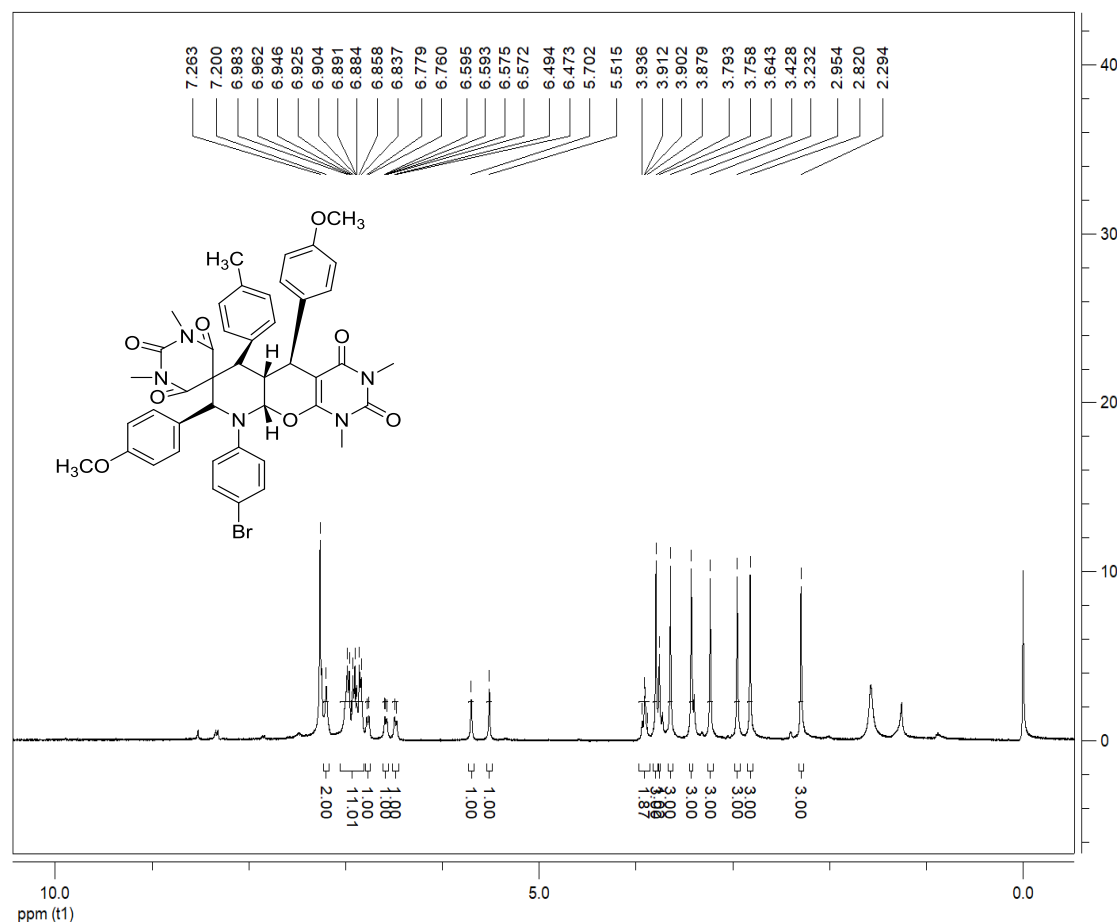

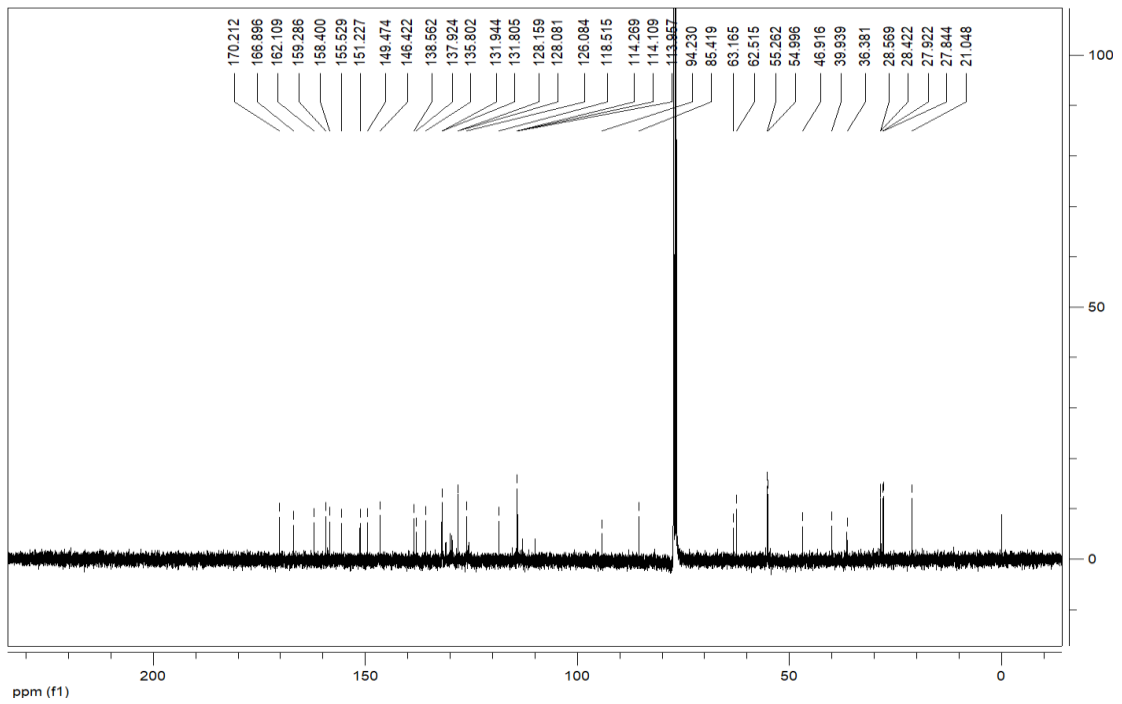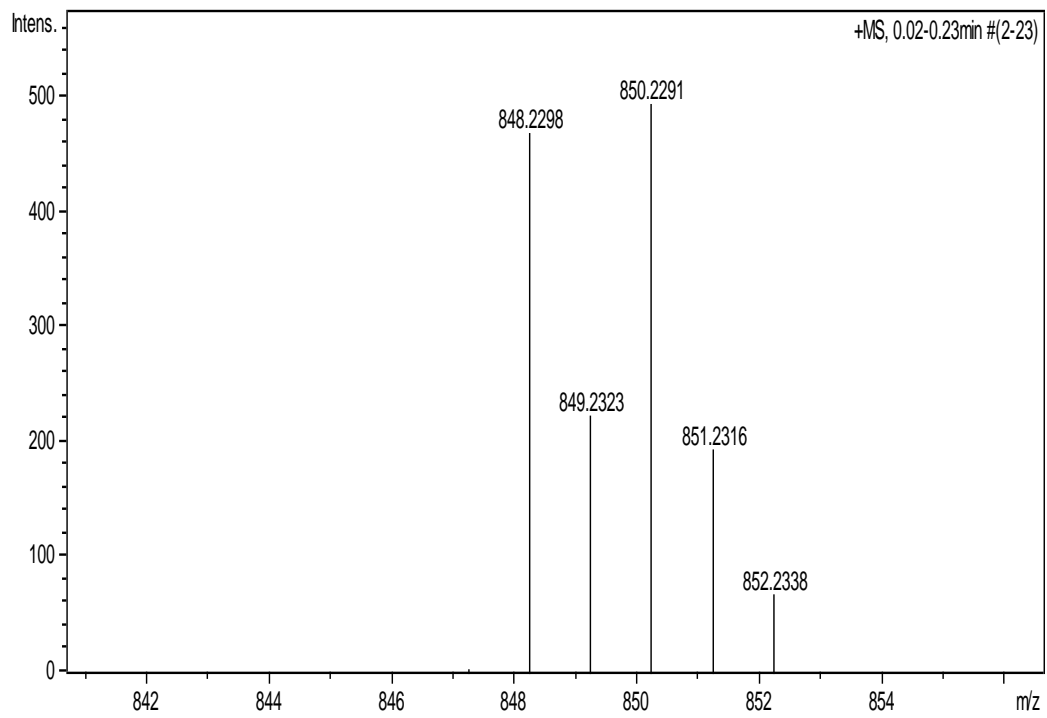

***rel*-(5S,5aS,6S,8R,9aS)-9-(4-bromophenyl)-6-(4-fluorophenyl)-5,8-bis(4-methoxyphenyl)-1,1',3,3'-tetramethyl-1,5,5a,8,9,9a-hexahydro-2H,2'H,6H-spiro[pyrido[3',2':5,6]pyrano[2,3-d]pyrimidine-7,5'-pyrimidine]-2,2',4,4',6'-pentaone (4o):**

white solid, 60%, m.p.124-126°C; <sup>1</sup>H NMR (400 MHz, CDCl<sub>3</sub>) δ: 7.36 (brs, 2H, ArH), 7.12 (brs, 2H, ArH), 6.96-6.87 (m, 9H, ArH), 6.75 (brs, 1H, ArH), 6.59 (s, 1H, ArH), 6.49 (s, 1H, ArH), 5.70 (s, 1H, CH), 5.48 (s, 1H, CH), 3.97-3.92 (m, 1H, CH), 3.80 (s, 3H, OCH<sub>3</sub>), 3.72 (brs, 2H, CH), 3.64 (s, 3H, OCH<sub>3</sub>), 3.43 (s, 3H, NCH<sub>3</sub>), 3.24 (s, 3H, NCH<sub>3</sub>), 2.96 (s, 3H, NCH<sub>3</sub>), 2.83 (s, 3H, NCH<sub>3</sub>); <sup>13</sup>C NMR (100 MHz, CDCl<sub>3</sub>) δ: 170.0, 166.8, 162.0, 159.4, 158.5, 155.5, 151.1, 149.2, 146.2, 135.5, 131.8, 129.5, 129.2, 128.1, 125.7, 118.6, 114.3, 114.1, 113.0, 94.0, 85.2, 63.5, 55.2, 55.0, 46.3, 40.0, 36.4, 28.5, 28.4, 27.9, 27.8; IR(KBr) ν: 2955, 2836, 1747, 1706, 1681, 1647, 1610, 1585, 1511, 1489, 1462, 1423, 1382, 1302, 1250, 1167, 1113, 1036, 987, 917, 896, 832, 789, 777, 760, 716, 665, 622, cm<sup>-1</sup>; MS (*m/z*): HRMS (ESI) Calcd. for C<sub>43</sub>H<sub>40</sub>BrFN<sub>5</sub>O<sub>8</sub>([M+H]<sup>+</sup>): 852.2044, found: 852.2066.

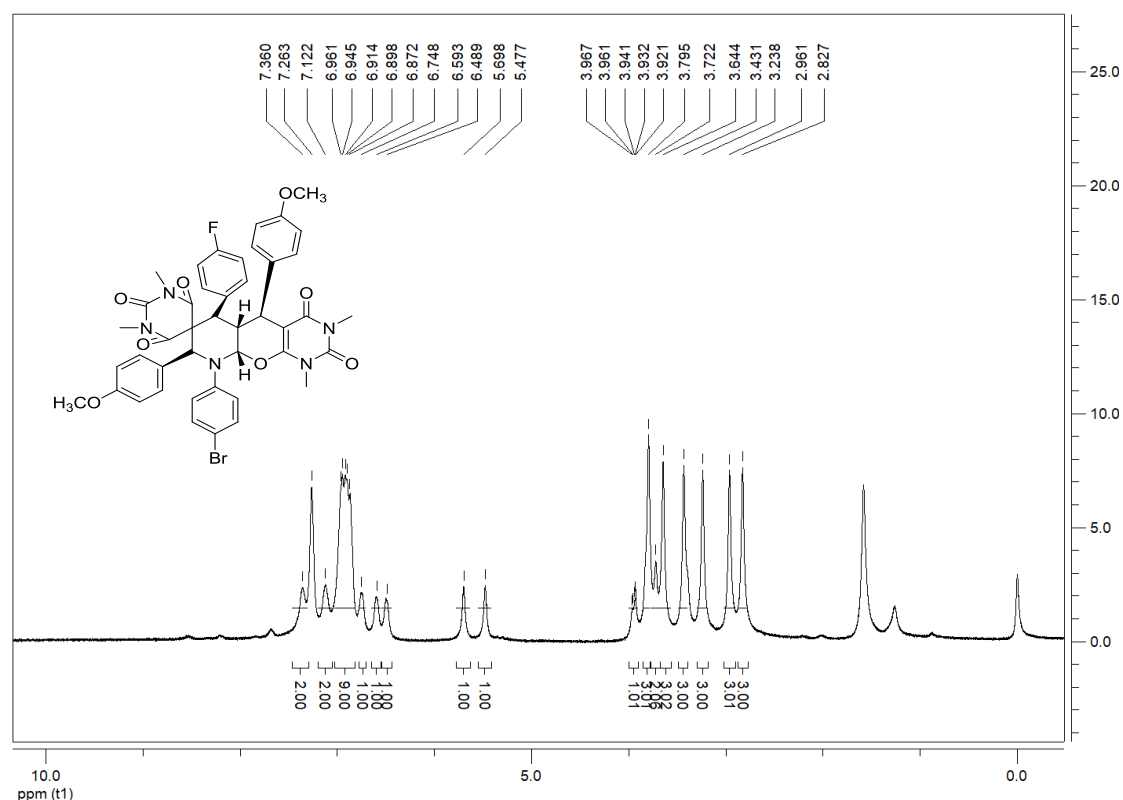

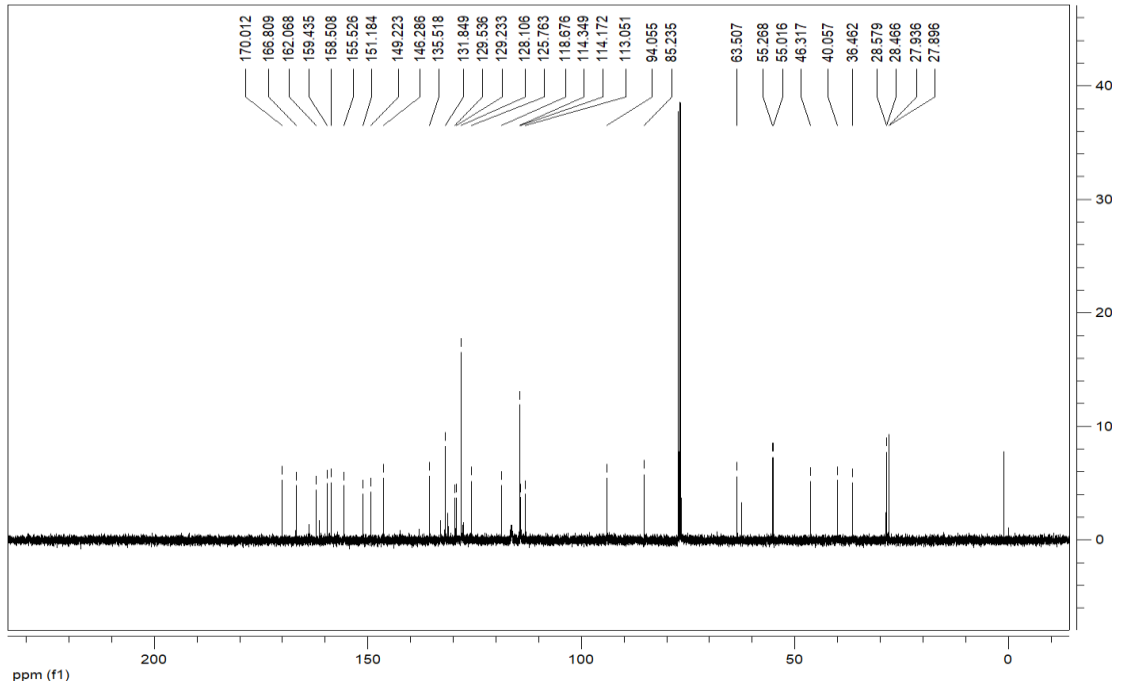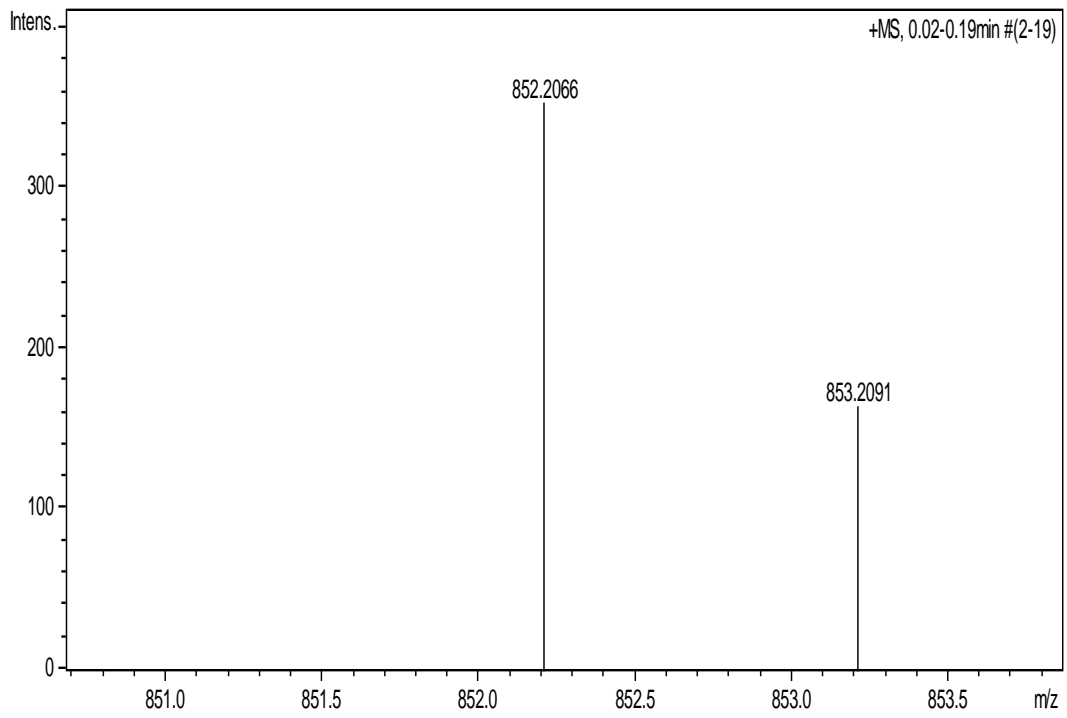



***rel*-(5*S*,5*aS*,6*S*,8*R*,9*aS*)-6-(4-chlorophenyl)-5,8-bis(4-methoxyphenyl)-1,1',3,3'-tetramethyl-9-phenyl-1,5,5*a*,8,9,9*a*-hexahydro-2*H*,2'*H*,6*H*-spiro[pyrido[3',2':5,6]pyrano[2,3-*d*]pyrimidine-7,5'-pyrimidine]-2,2',4,4',6'pentaone (4*p*):**

white solid, 27%, m.p.117-120°C; <sup>1</sup>H NMR (400 MHz, CDCl<sub>3</sub>) δ: 7.42-7.19 (m, 2H, ArH), 7.22-7.12 (m, 3H, ArH), 7.02-6.93 (m, 9H, ArH), 6.78 (s, 1H, ArH), 6.59 (s, 1H, ArH), 6.46 (s, 1H, ArH), 5.78 (s, 1H, CH), 5.52 (s, 1H, CH), 4.02-3.97 (m, 1H, CH), 3.86-3.79 (m, 4H, CH, OCH<sub>3</sub>), 3.71 (s, 1H, CH), 3.62 (s, 3H, OCH<sub>3</sub>), 3.44 (s, 3H, NCH<sub>3</sub>), 3.24 (s, 3H, NCH<sub>3</sub>), 2.97 (s, 3H, NCH<sub>3</sub>), 2.80 (s, 3H, NCH<sub>3</sub>); <sup>13</sup>C NMR (100 MHz, CDCl<sub>3</sub>) δ: 170.0, 166.7, 162.1, 159.3, 158.4, 155.6, 151.2, 149.2, 147.0, 135.5, 134.6, 134.2, 132.6, 129.5, 129.5, 129.4, 129.2, 128.7, 128.1, 127.5, 126.5, 126.0, 125.3, 114.3, 113.9, 112.8, 94.4, 85.1, 63.9, 62.4, 55.2, 54.9, 46.3, 40.0, 36.5, 28.5, 28.4, 27.9; IR(KBr) ν: 2956, 2835, 1747, 1705, 1681, 1644, 1511, 1493, 1454, 1422, 1382, 1298, 1248, 1167, 1092, 1036, 1015, 988, 918, 895, 863, 829, 811, 793, 759, 717, 699, 674, 642 cm<sup>-1</sup>; MS (*m/z*): HRMS (ESI) Calcd. for C<sub>43</sub>H<sub>41</sub>ClN<sub>5</sub>O<sub>8</sub>([M+H]<sup>+</sup>): 790.2644, found: 790.2657.

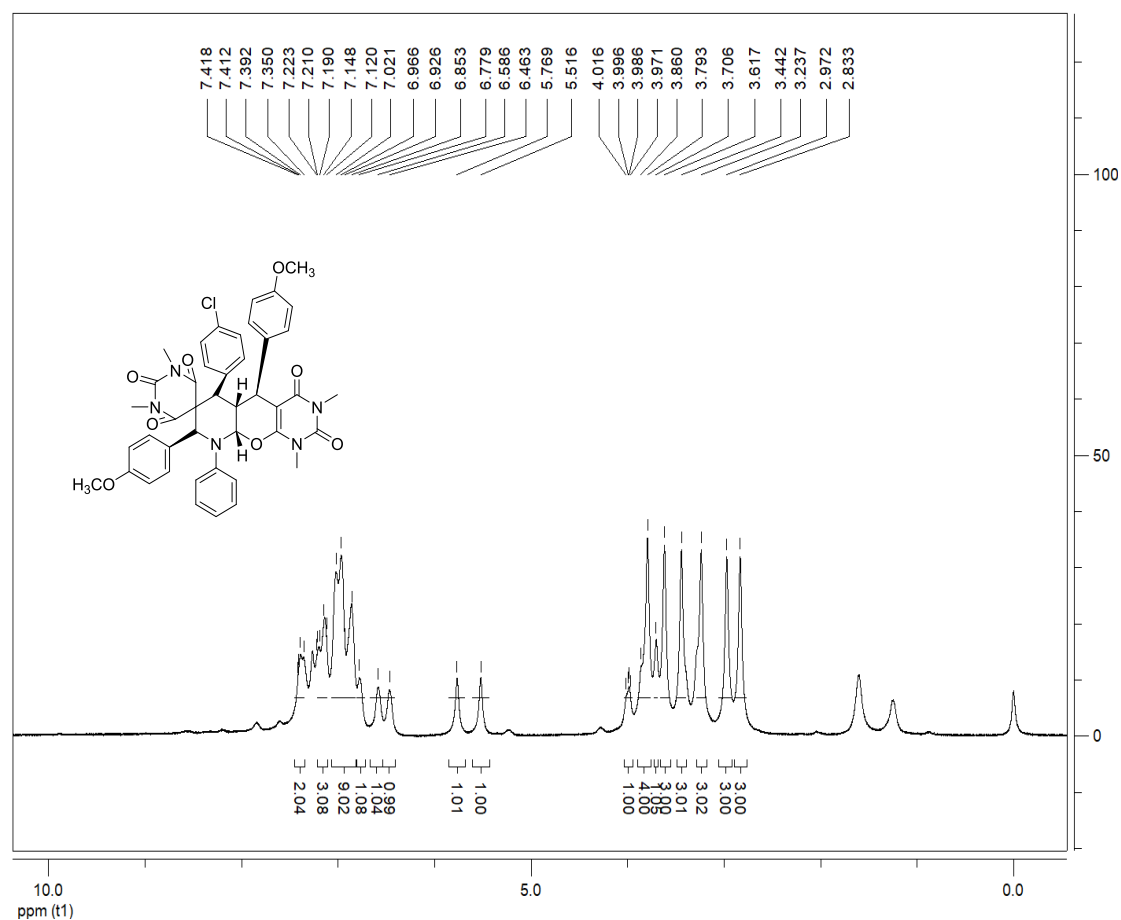

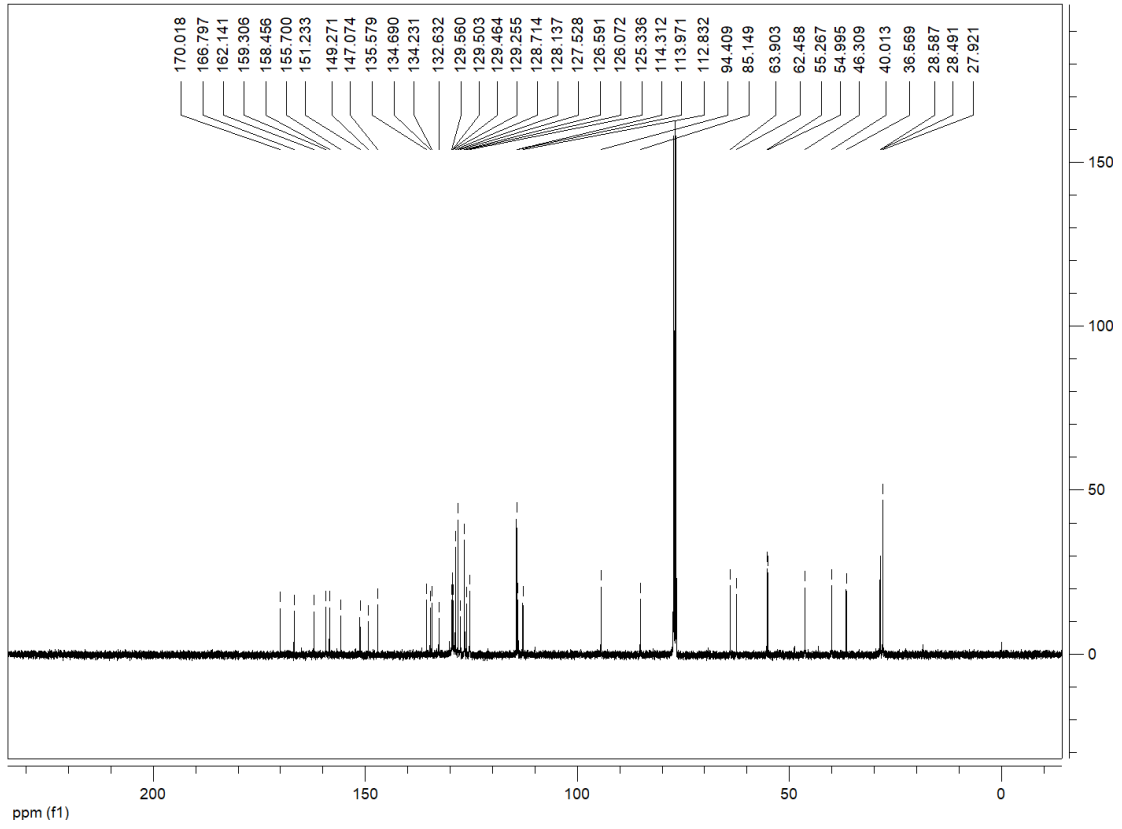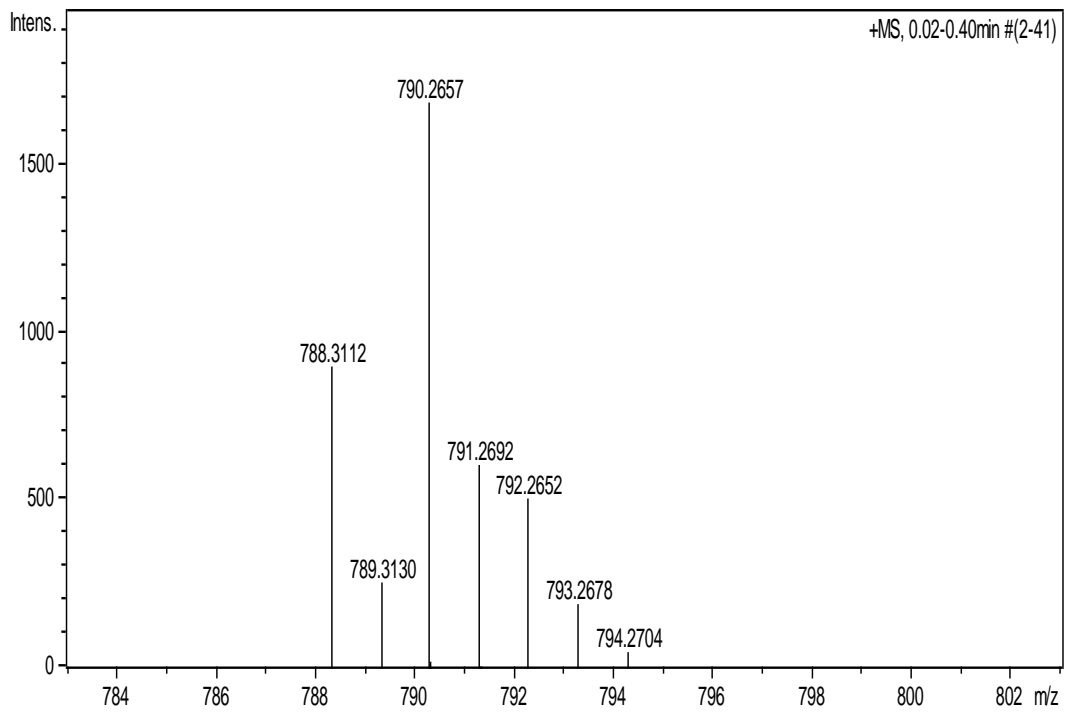

***rel*-(5*S*,5*aS*,6*S*,8*R*,9*aS*)-6-(4-chlorophenyl)-5,8,9-tris(4-methoxyphenyl)-1,1',3,3'-tetramethyl-1,5,5*a*,8,9,9*a*-hexahydro-2*H*,2'*H*,6*H*-spiro[pyrido[3',2':5,6]pyrano[2,3-*d*]pyrimidine-7,5'-pyrimidine]-2,2',4,4',6'-pentaone (4q):**

white solid, 34%, m.p.117-120°C; <sup>1</sup>H NMR (400 MHz, CDCl<sub>3</sub>) δ: 7.41-7.33 (m, 3H, ArH), 7.20 (d, *J* = 7.6 Hz, 1H, ArH), 6.99-6.94 (m, 4H, ArH), 6.85-6.83 (m, 3H, ArH), 6.79 (d, *J* = 8.4 Hz, 1H, ArH), 6.65 (d, *J* = 8.4 Hz, 1H, ArH), 6.56 (d, *J* = 8.0 Hz, 1H, CH), 6.49 (d, *J* = 8.0 Hz, 1H, ArH), 5.67 (s, 1H, CH), 5.45 (s, 1H, CH), 3.97 (d, *J* = 13.2 Hz, 1H, CH), 3.84 (d, *J* = 13.2 Hz, 1H, CH), 3.79 (s, 3H, OCH<sub>3</sub>), 3.69 (s, 4H, CH, OCH<sub>3</sub>), 3.63 (s, 3H, OCH<sub>3</sub>), 3.48 (s, 3H, NCH<sub>3</sub>), 3.24 (s, 3H, NCH<sub>3</sub>), 2.96 (s, 3H, NCH<sub>3</sub>), 2.84 (s, 3H, NCH<sub>3</sub>); <sup>13</sup>C NMR (100 MHz, CDCl<sub>3</sub>) δ: 169.9, 166.7, 162.1, 159.2, 158.4, 156.9, 155.8, 151.2, 149.2, 139.7, 135.6, 134.6, 134.3, 132.6, 130.1, 129.5, 129.4, 128.1, 127.8, 127.5, 126.0, 114.2, 113.9, 113.9, 113.8, 112.6, 94.6, 85.1, 64.2, 62.4, 55.2, 55.2, 54.9, 46.2, 40.0, 36.5, 28.6, 28.4, 27.9; IR(KBr) ν: 2954, 2835, 1747, 1704, 1678, 1655, 1611, 1573, 1510, 1492, 1454, 1423, 1380, 1342, 1325, 1294, 1244, 1175, 1113, 1085, 1034, 968, 918, 894, 862, 824, 803, 780, 754, 727, 698, 674, 627cm<sup>-1</sup>; MS (*m/z*): HRMS (ESI) Calcd. for C<sub>44</sub>H<sub>43</sub>ClN<sub>5</sub>O<sub>9</sub>([M+H]<sup>+</sup>): 820.2749, found: 820.2770.

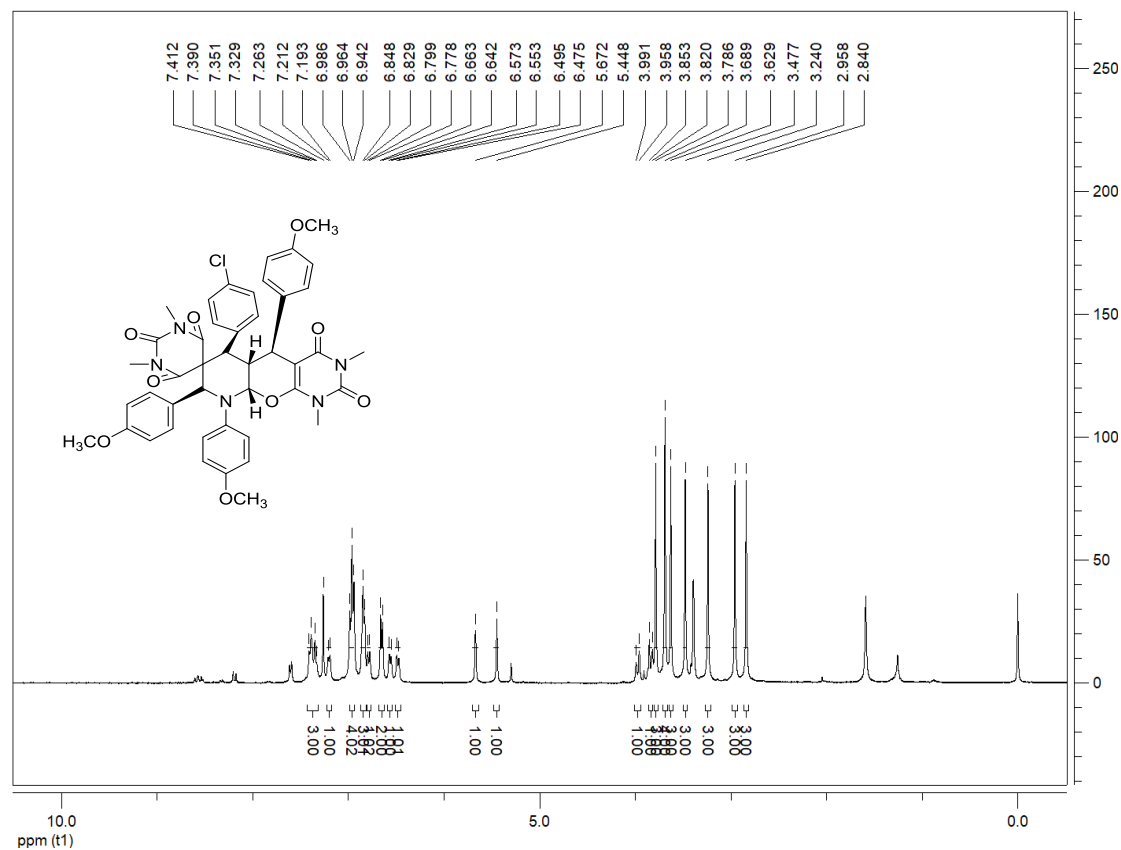

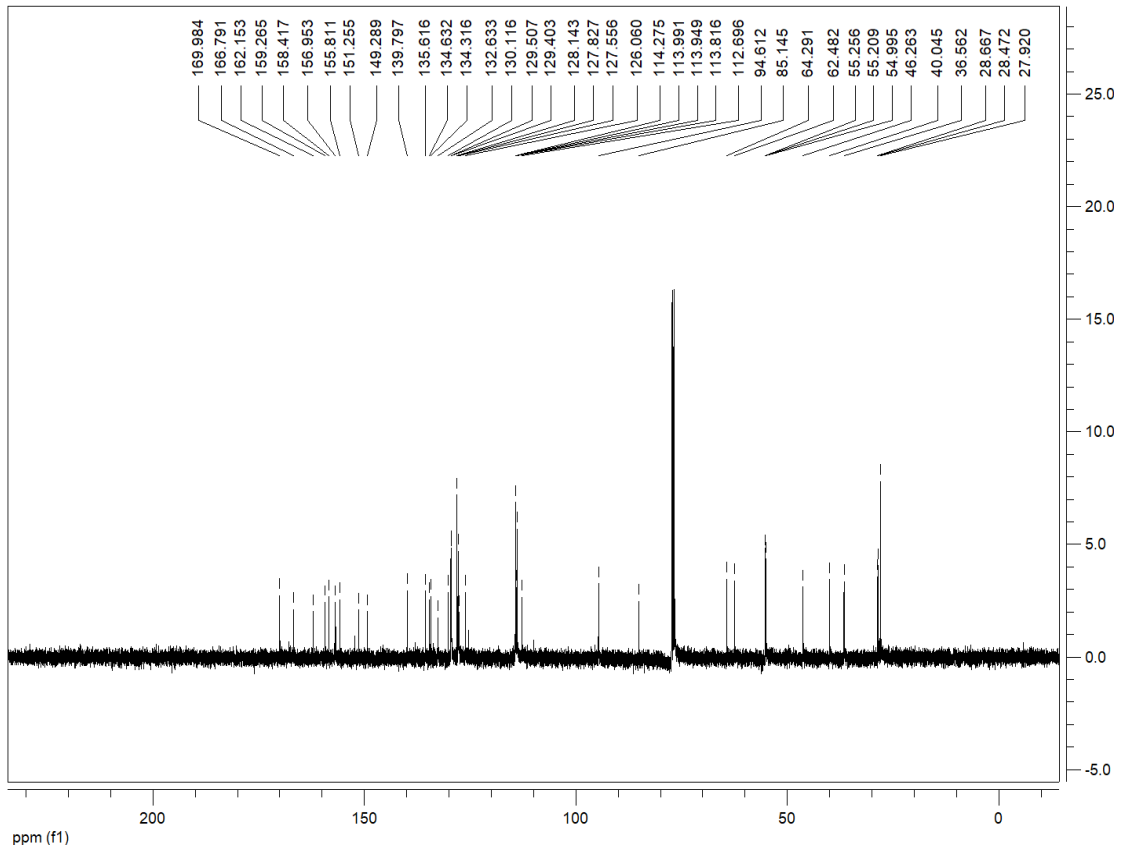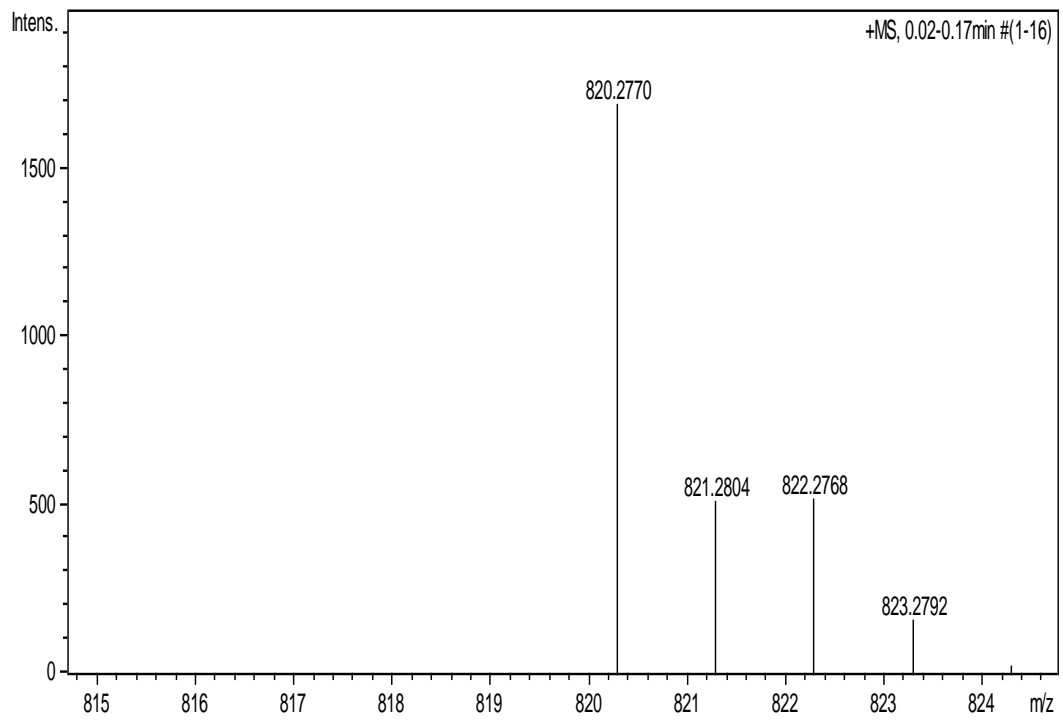

***rel*-(5S,5aS,6S,8R,9aS)-9-(4-bromophenyl)-6-(4-chlorophenyl)-5,8-bis(4-methoxyphenyl)-1,1',3,3'-tetramethyl-1,5,5a,8,9,9a-hexahydro-2H,2'H,6H-spiro[pyrido[3',2':5,6]pyrano[2,3-d]pyrimidine-7,5'-pyrimidine]-2,2',4,4',6'-pentaone (4r):**

white solid, 53%, m.p.122-125 °C; <sup>1</sup>H NMR (400 MHz, CDCl<sub>3</sub>) δ: 7.40 (d, *J* = 8.0 Hz, 1H, ArH), 7.30 (d, *J* = 8.0 Hz, 1H, ArH), 7.25 (s, 1H, ArH), 7.21 (d, *J* = 7.2 Hz, 1H, ArH), 6.96-6.84 (m, 9H, ArH), 6.74 (d, *J* = 8.4 Hz, 1H, ArH), 6.60 (d, *J* = 7.2 Hz, 1H, ArH), 6.50 (d, *J* = 8.8 Hz, 1H, ArH), 5.69 (s, 1H, CH), 5.45 (s, 1H, CH), 3.96 (d, *J* = 13.2 Hz, 1H, CH), 3.83 (s, 1H, CH), 3.80 (s, 3H, OCH<sub>3</sub>), 3.70(s, 1H, CH), 3.65 (s, 3H, OCH<sub>3</sub>), 3.41 (s, 3H, NCH<sub>3</sub>), 3.24 (s, 3H, NCH<sub>3</sub>), 2.97 (s, 3H, NCH<sub>3</sub>), 2.83 (s, 3H, NCH<sub>3</sub>); <sup>13</sup>C NMR (100 MHz, CDCl<sub>3</sub>) δ: 169.8, 166.7, 162.0, 159.4, 158.5, 155.5, 151.1, 149.1, 146.2, 135.4, 134.7, 134.0, 132.6, 132.5, 131.8, 129.6, 129.5, 129.5, 129.1, 128.1, 127.4, 125.6, 118.7, 114.3, 114.1, 113.0, 93.9, 85.1, 63.6, 62.3, 55.2, 55.0, 46.2, 39.9, 36.4, 28.5, 28.5, 27.9; IR(KBr) ν: 2955, 2836, 1747, 1682, 1644, 1511, 1490, 1463, 1423, 1381, 1351, 1329, 1300, 1251, 1167, 1092, 1036, 1012, 988, 966, 918, 896, 829, 791, 777, 758, 717, 697, 678, 657, 622 cm<sup>-1</sup>; MS (*m/z*): HRMS (ESI) Calcd. for C<sub>43</sub>H<sub>40</sub>BrClN<sub>5</sub>O<sub>8</sub>([M+H]<sup>+</sup>): 868.1479, found: 868.1764.

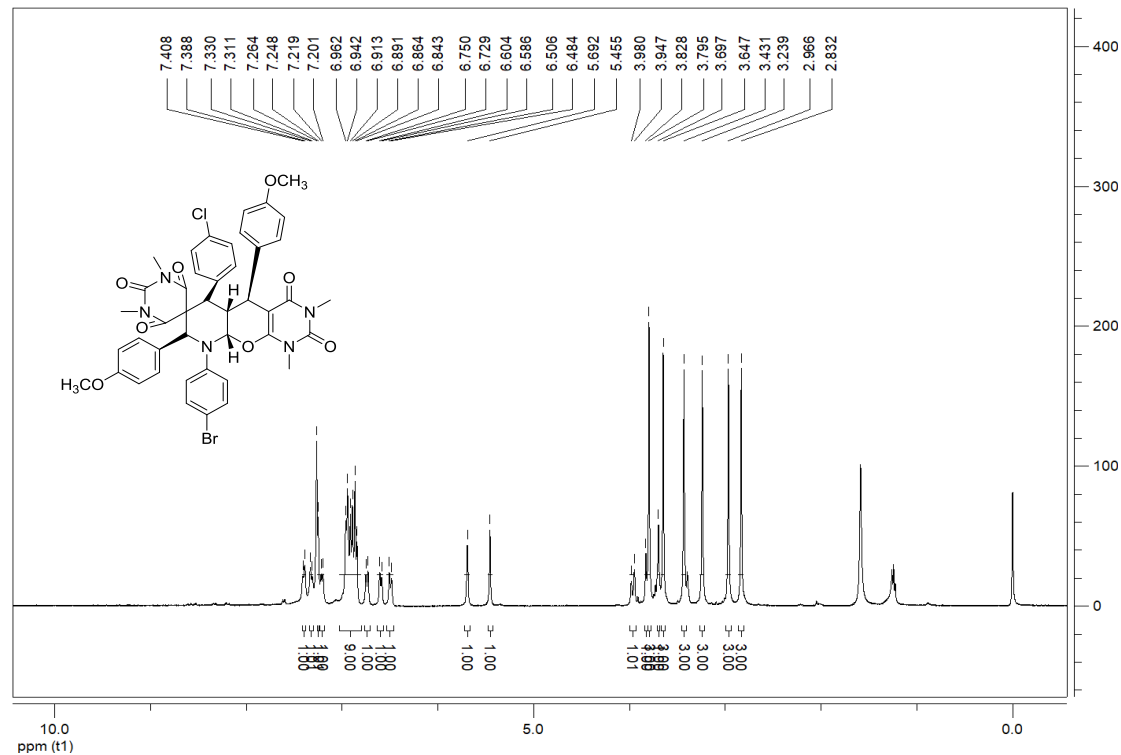

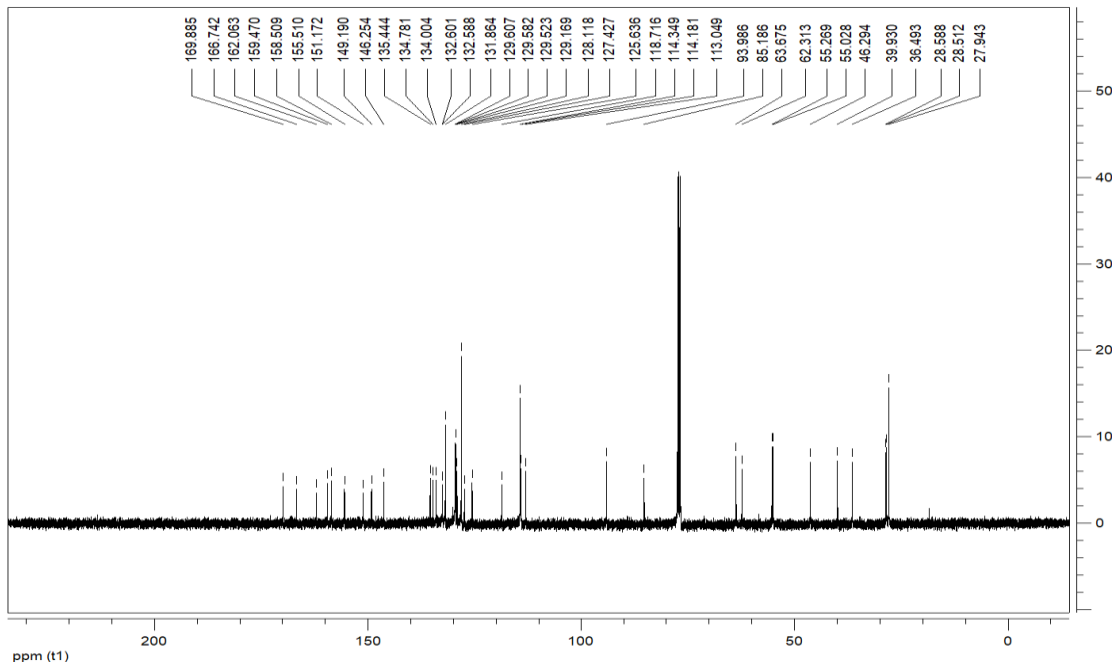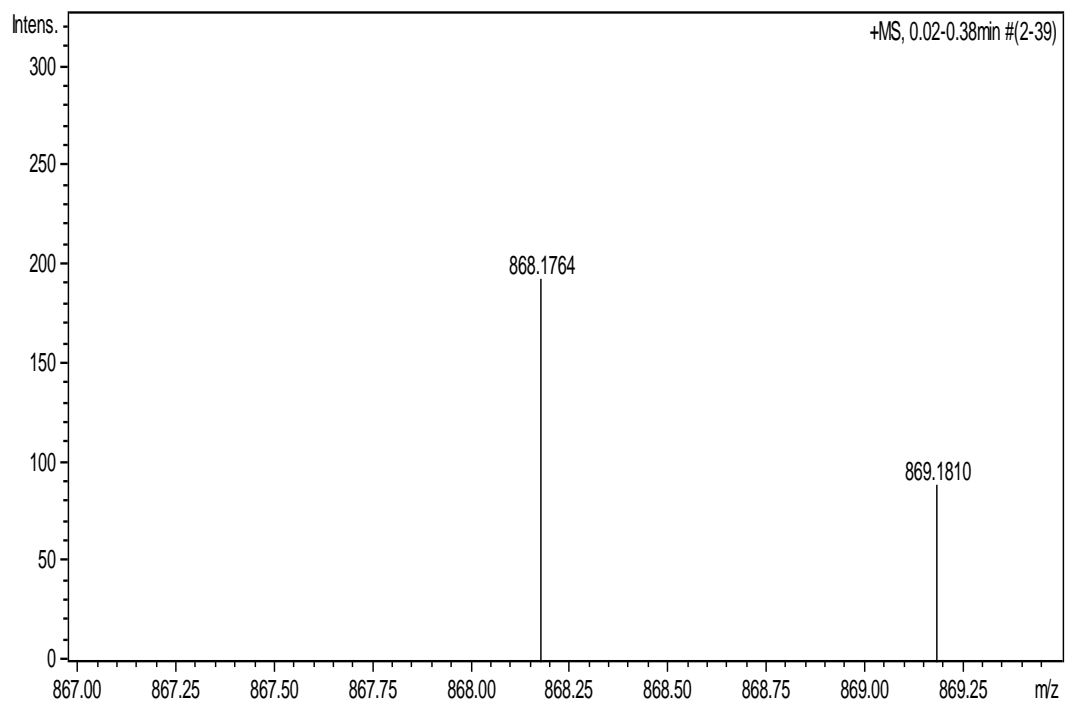

***rel*-(5S,5aS,6S,8R,9aS)-6-(4-chlorophenyl)-1,1',3,3'-tetramethyl-5,8-diphenyl-9-(*o*-tolyl)-1,5,5a,8,9,9a-hexahydrospiro[pyrido[3',2':5,6]pyrano[2,3-d]pyrimidine-7,5'-pyrimidine]-2,2',4,4',6'-pentaone (5a):**

white solid, 88%, m.p.140-142 °C; <sup>1</sup>H NMR (400 MHz, CDCl<sub>3</sub>) δ: 7.40 (brs, 2H, ArH), 7.33-7.28 (m, 2H, ArH), 7.25 -7.22 (m, 2H, ArH), 7.10-6.97 (m, 7H, ArH), 6.94-6.85 (m, 4H, ArH), 6.65 (d, *J* = 8.4 Hz, 1H, ArH), 5.63 (s, 1H, CH), 5.51 (d, *J* = 2.4 Hz, 1H, CH), 4.04 (d, *J* = 13.2 Hz, 1H, CH), 3.93 (d, *J* = 13.2 Hz, 1H, CH), 3.77 (s, 1H, CH), 3.49 (s, 3H, NCH<sub>3</sub>), 3.25 (s, 3H, NCH<sub>3</sub>), 2.95 (s, 3H, NCH<sub>3</sub>), 2.82 (s, 3H, NCH<sub>3</sub>), 2.16 (s, 3H, CH<sub>3</sub>); <sup>13</sup>C NMR (100 MHz, CDCl<sub>3</sub>) δ: 169.7, 166.8, 162.2, 156.0, 151.2, 149.1, 144.5, 143.5, 134.7, 134.6, 134.2, 134.1, 132.6, 131.3, 129.5, 128.8, 128.7, 128.3, 128.2, 128.0, 127.6, 127.0, 127.0, 126.2, 125.5, 125.4, 92.4, 84.9, 77.4, 77.1, 76.7, 65.4, 62.4, 46.2, 39.7, 37.3, 17.1; IR(KBr) ν: 2958, 1650, 1487, 1453, 1381, 1272, 1170, 997, 918, 826, 763, 704 cm<sup>-1</sup>; MS (*m/z*): HRMS (ESI) Calcd. for C<sub>42</sub>H<sub>39</sub>ClN<sub>5</sub>O<sub>6</sub>([M+H]<sup>+</sup>): 744.2589, found: 744.2813.

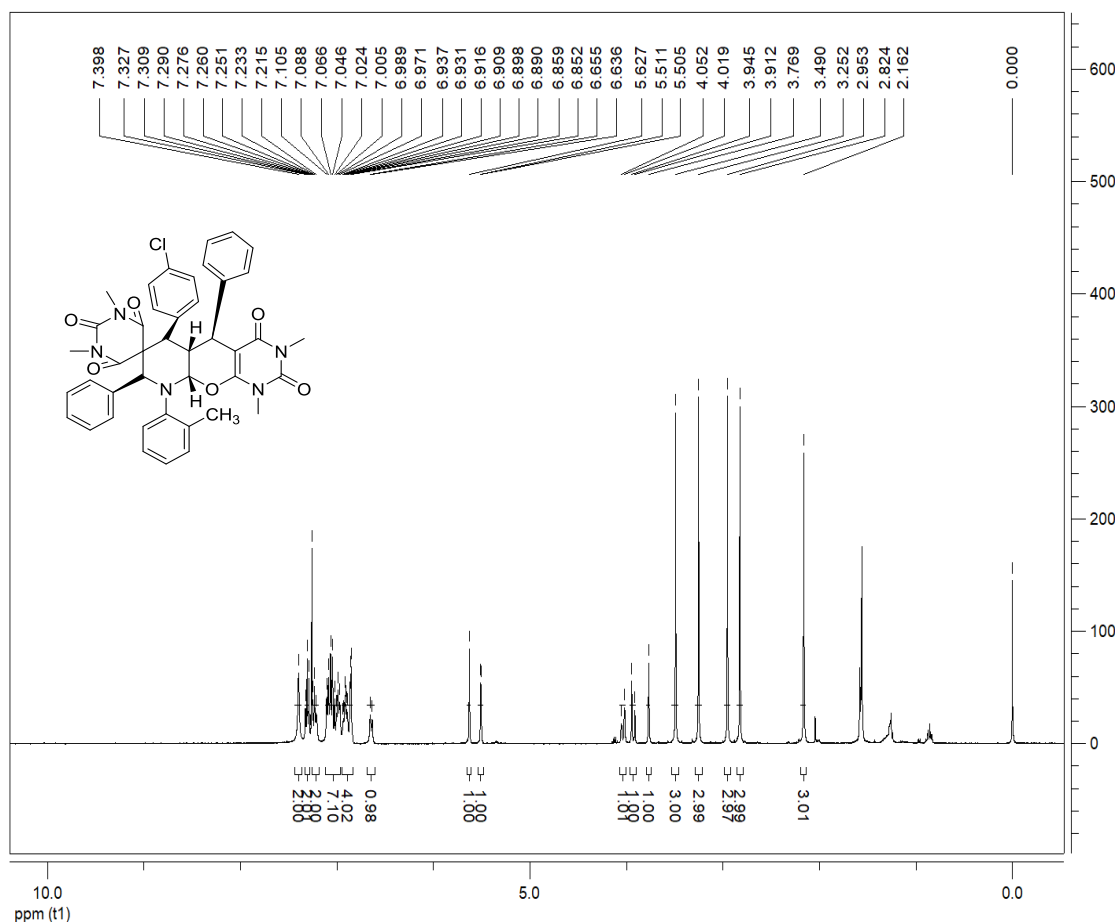

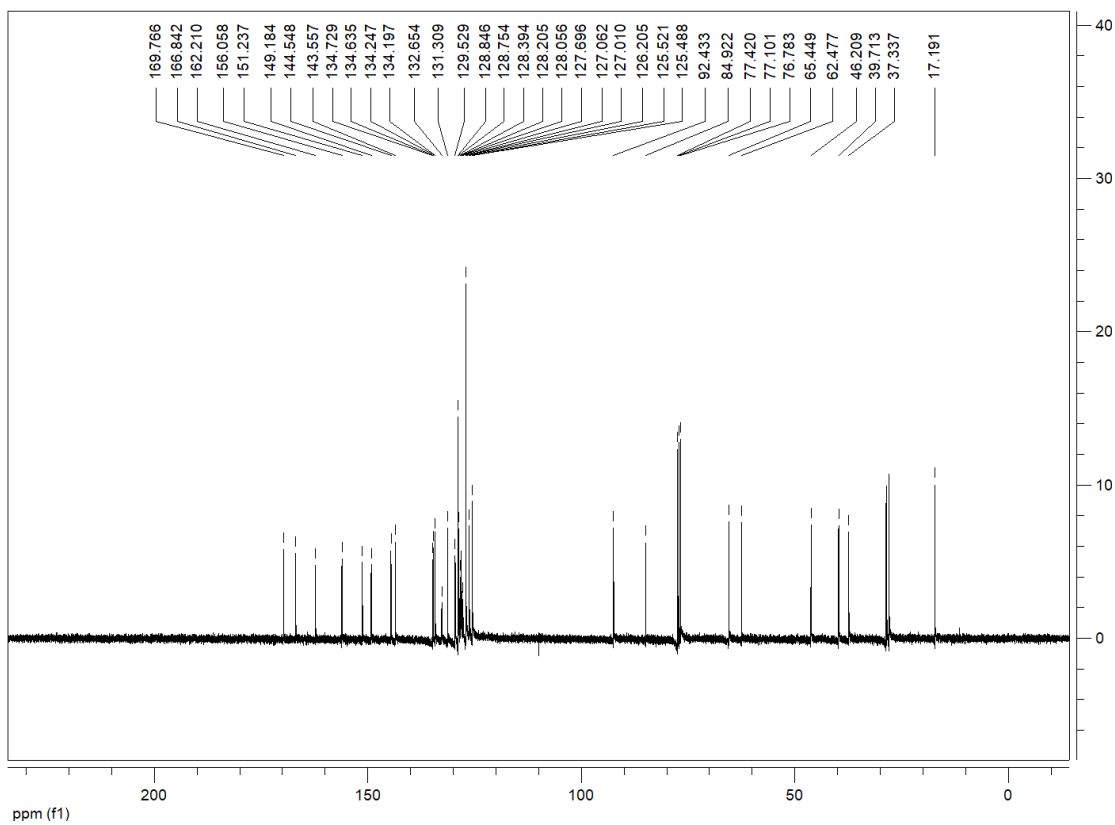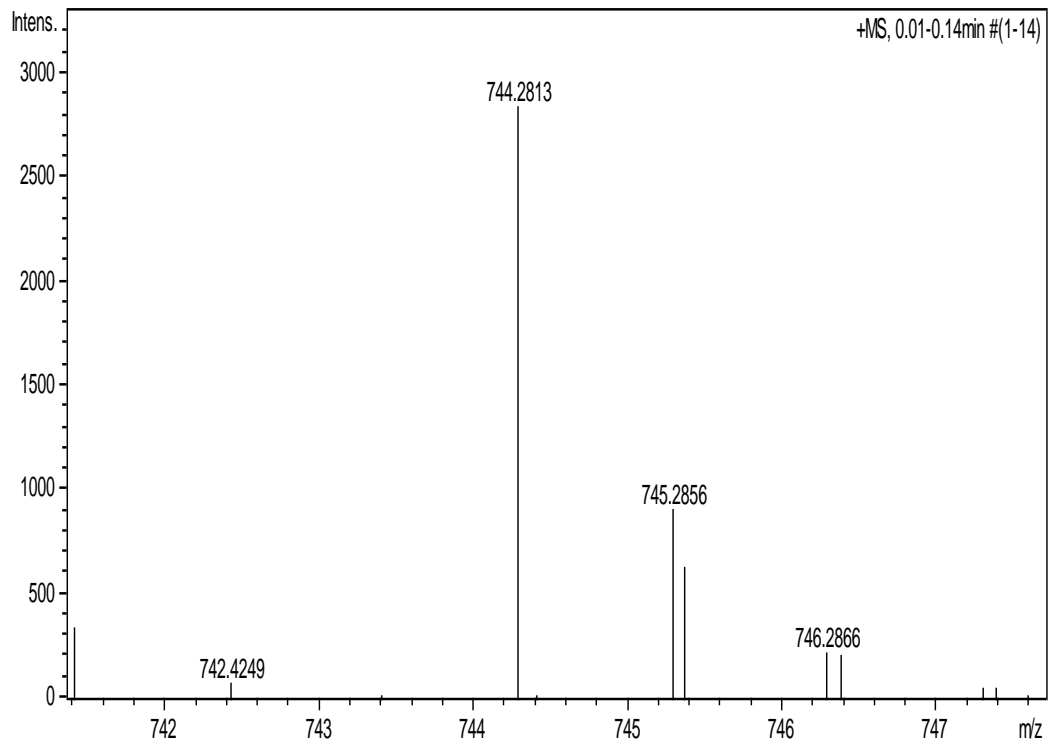



***rel*-(5*S*,5*aS*,6*S*,8*R*,9*aS*)-9-(4-bromophenyl)-6-(4-chlorophenyl)-1,1',3,3'-tetramethyl-5,8-diphenyl-1,5,5*a*,8,9,9*a*-hexahydro-2*H*,2'*H*,6*H*-spiro[pyrido[3',2':5,6]pyrano[2,3-*d*]pyrimidine-7,5'-pyrimidine]-2,2',4,4',6'-pentaone (5b):**

white solid, 75%, m.p.142-144 °C; <sup>1</sup>H NMR (400 MHz, CDCl<sub>3</sub>) δ: 7.41 (d, *J* = 7.6 Hz, 1H, ArH), 7.33 (t, *J* = 7.6 Hz, 3H, ArH), 7.28 -7.26 (m, 1H, ArH), 7.24-7.18 (m, 3H, ArH), 7.13-7.09 (m, 1H, ArH), 7.05 (t, *J* = 7.4 Hz, 3H, ArH), 7.00-6.95 (m, 3H, ArH), 6.91 (d, *J* = 8.8 Hz, 2H, ArH), 6.83 (d, *J* = 8.0 Hz, 1H, ArH), 5.72 (d, *J* = 2.0 Hz, 1H, CH), 5.51 (s, 1H, CH), 4.04 (d, *J* = 13.2 Hz, 1H, CH), 3.86 (d, *J* = 13.2 Hz, 1H, CH), 3.76 (s, 1H, CH), 3.44 (s, 3H, NCH<sub>3</sub>), 3.24 (s, 3H, NCH<sub>3</sub>), 2.96 (s, 3H, NCH<sub>3</sub>), 2.79 (s, 3H, NCH<sub>3</sub>); <sup>13</sup>C NMR (100 MHz, CDCl<sub>3</sub>) δ: 169.7, 166.6, 162.0, 155.6, 151.1, 149.0, 146.1, 143.3, 134.8, 133.9, 132.7, 131.9, 129.6, 128.9, 128.9, 128.4, 128.2, 128.1, 128.0, 127.9, 127.5, 127.1, 127.0, 118.8, 93.8, 84.9, 64.3, 62.1, 46.2, 39.8, 37.3, 28.6, 28.5, 27.9, 27.8; IR(KBr) ν: 2957, 1650, 1503, 1455, 1381, 1240, 1169, 1034, 913, 833, 763, 708 cm<sup>-1</sup>; MS (*m/z*): HRMS (ESI) Calcd. for C<sub>41</sub>H<sub>36</sub>BrClN<sub>5</sub>O<sub>6</sub>([M+H]<sup>+</sup>): 808.1537, found: 808.1530.

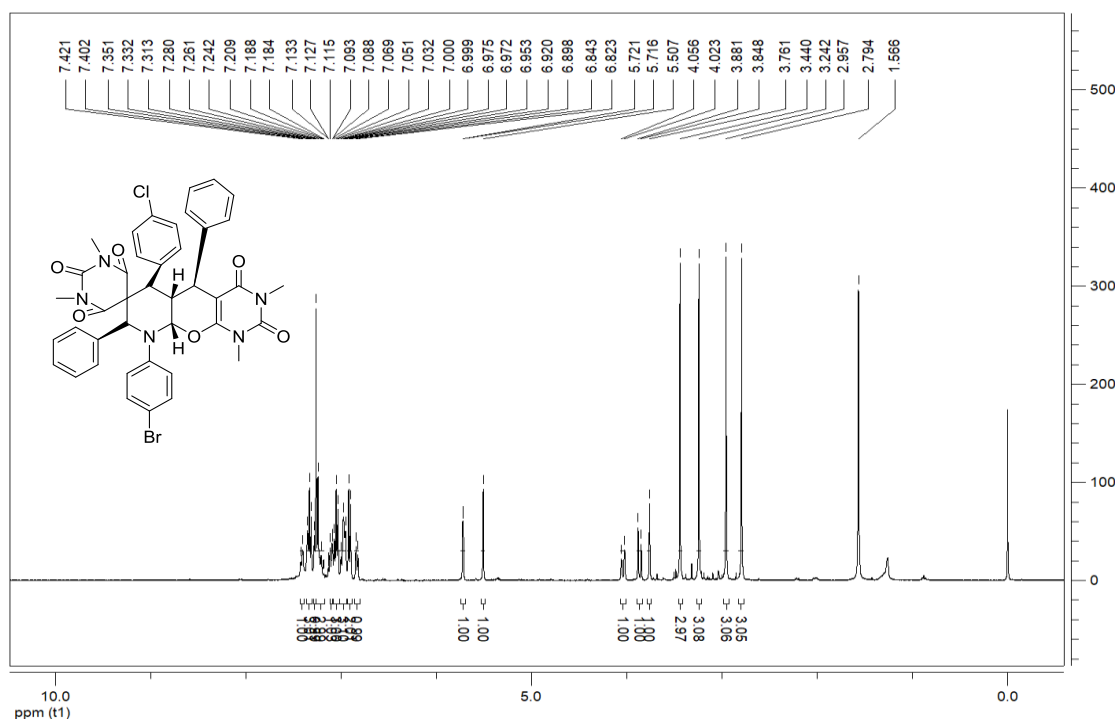

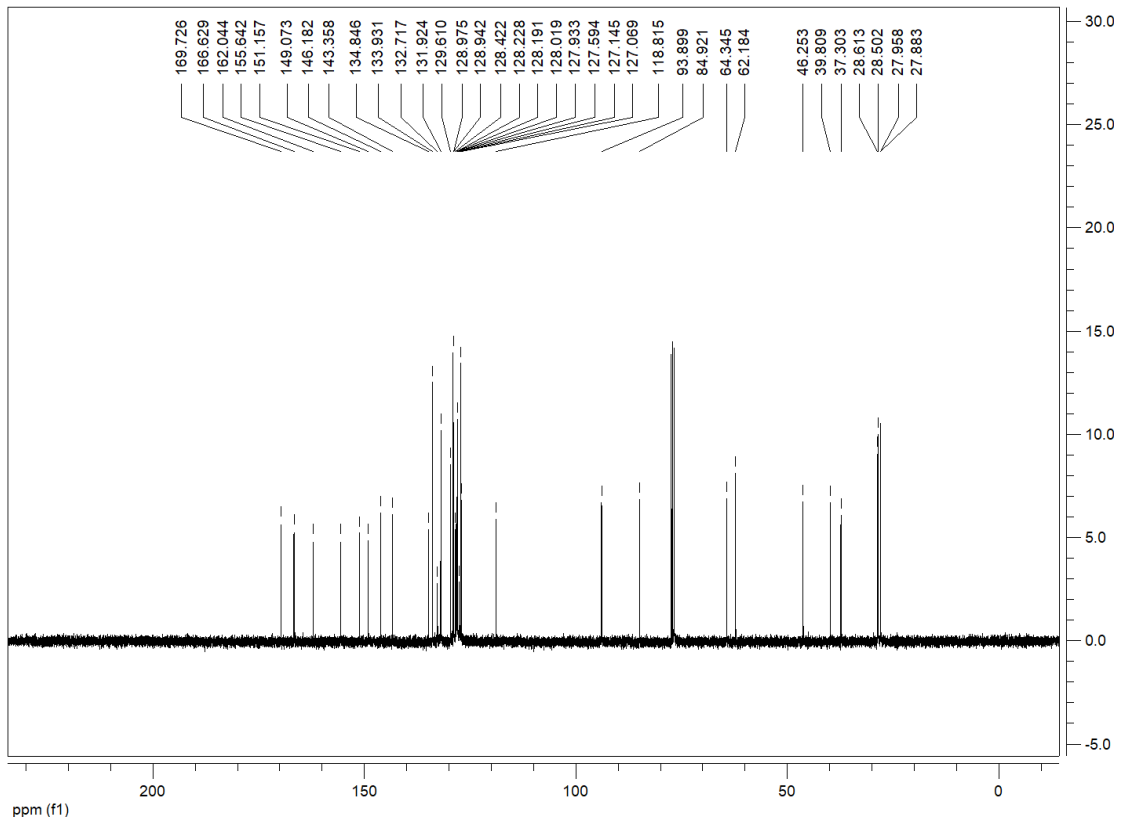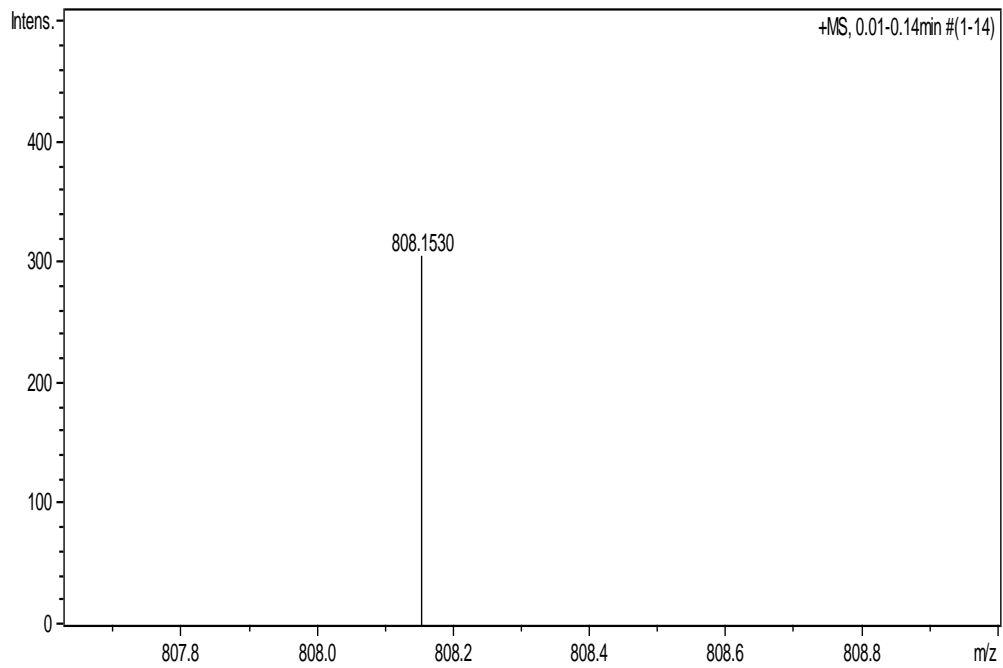



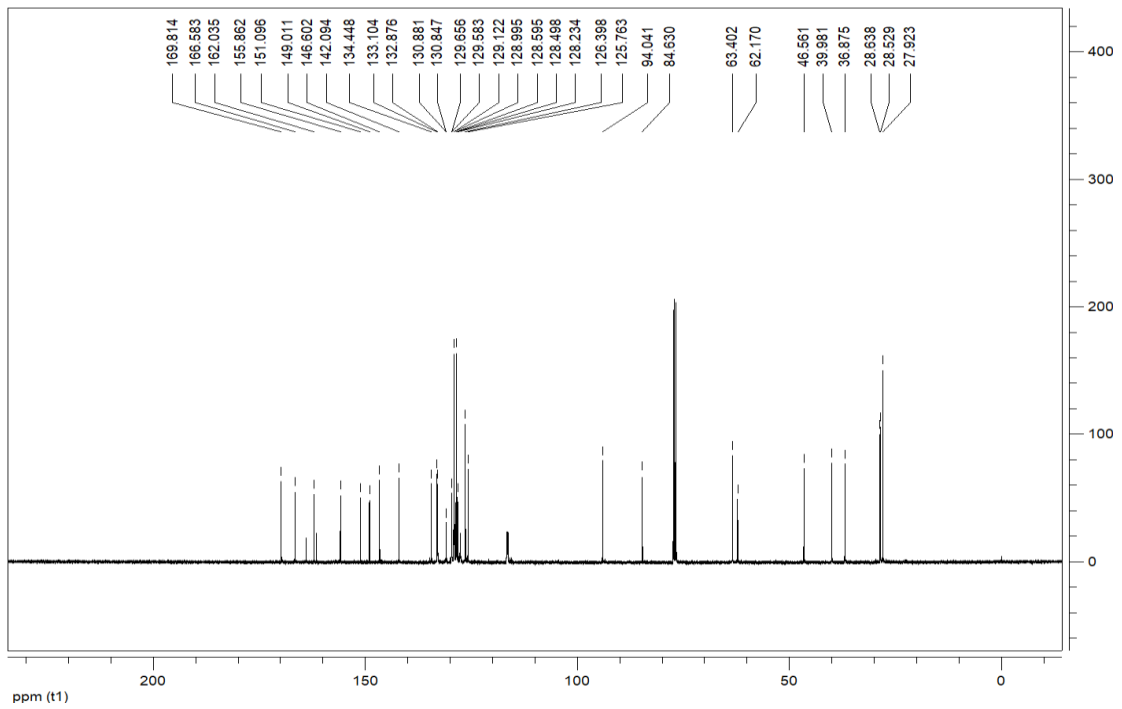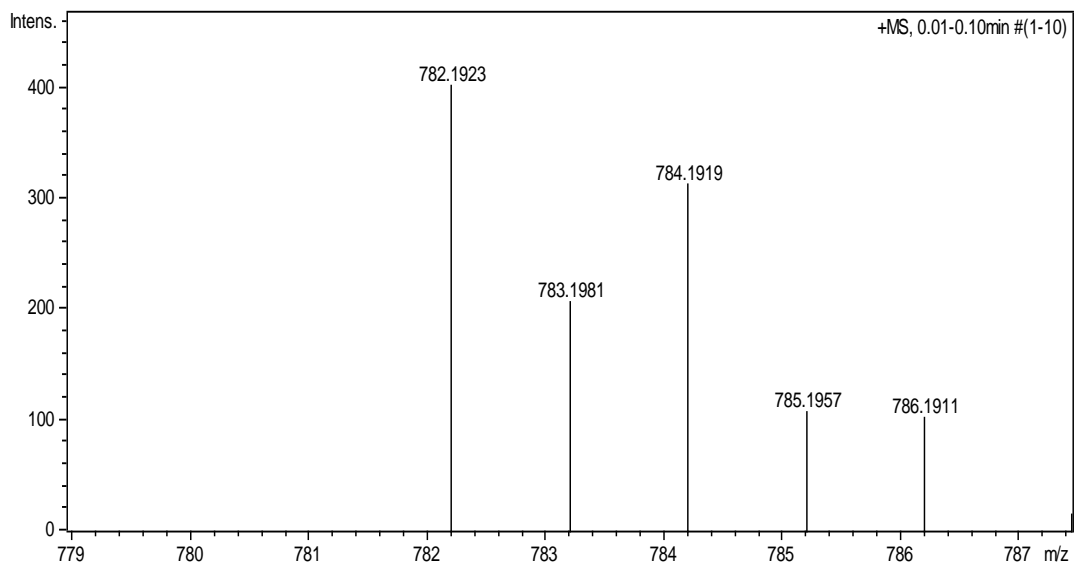



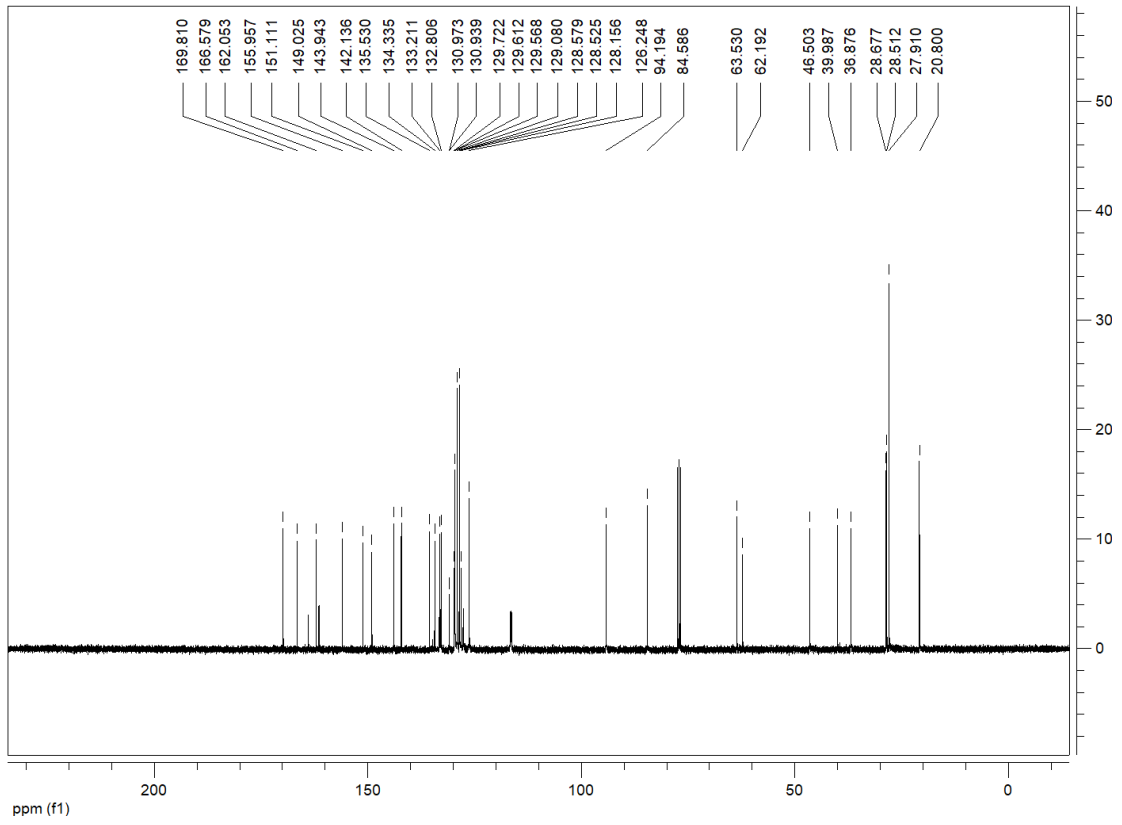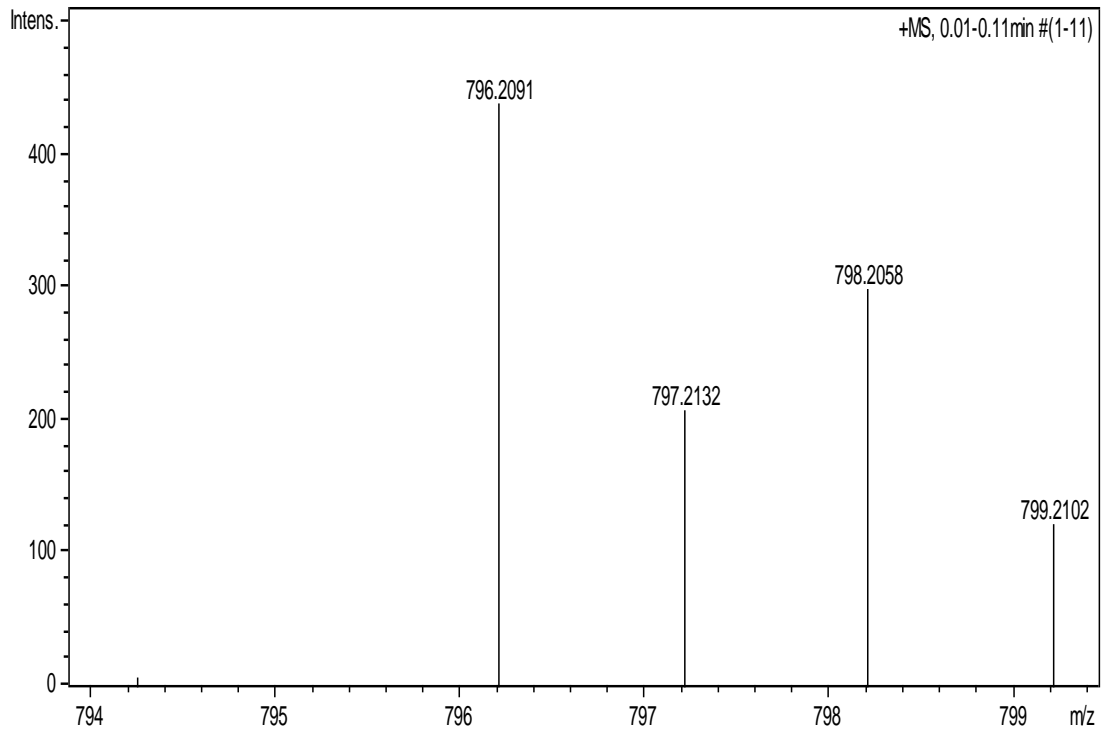

***rel*-(5*S*,5*aS*,6*S*,8*R*,9*aS*)-9-(3-chlorophenyl)-5,8-bis(4-chlorophenyl)-6-(4-fluorophenyl)-1,1,3,3'-tetramethyl-1,5,5*a*,8,9,9*a*-hexahydro-2*H*,2'*H*,6*H*-spiro[pyrido[3',2':5,6]pyrano[2,3-*d*]pyrimidine-7,5'-pyrimidine]-2,2',4,4',6'-pentaone (5e):**

white solid, 87%, m.p.180-182 °C; <sup>1</sup>H NMR (400 MHz, CDCl<sub>3</sub>) δ: 7.31-7.29 (m, 3H, ArH), 7.15-7.13 (m, 3H, ArH), 7.10-7.08 (m, 1H, ArH), 7.00-6.96 (m, 7H, ArH), 6.93-6.91 (m, 1H, ArH), 6.83 (d, *J* = 8.4 Hz, 1H, ArH), 5.64 (d, *J* = 2.4 Hz, 1H, CH), 5.56 (s, 1H, CH), 3.91 (d, *J* = 13.2 Hz, 1H, CH), 3.81 (d, *J* = 12.8 Hz, 1H, CH), 3.73 (s, 1H, CH), 3.73 (s, 1H, CH), 3.44 (s, 3H, NCH<sub>3</sub>), 3.23 (s, 3H, NCH<sub>3</sub>), 2.97 (s, 3H, NCH<sub>3</sub>), 2.84 (s, 3H, NCH<sub>3</sub>); <sup>13</sup>C NMR (100 MHz, CDCl<sub>3</sub>) δ: 169.6, 166.5, 161.9, 155.6, 151.0, 148.9, 145.2, 141.9, 134.7, 132.9, 132.7, 131.3, 130.6, 130.6, 129.6, 129.5, 129.1, 129.1, 128.8, 128.4, 128.4, 127.6, 127.5, 93.6, 84.6, 63.2, 62.0, 46.5, 39.9, 36.8, 28.6, 28.5, 27.9; IR(KBr) ν: 2957, 1651, 1484, 1377, 1273, 1232, 1171, 1094, 1019, 911, 829, 760, 717, 670 cm<sup>-1</sup>; MS (*m/z*): HRMS (ESI) Calcd. for C<sub>41</sub>H<sub>34</sub>Cl<sub>3</sub>FN<sub>5</sub>O<sub>6</sub>([M+H]<sup>+</sup>): 816.1559, found: 816.1541.

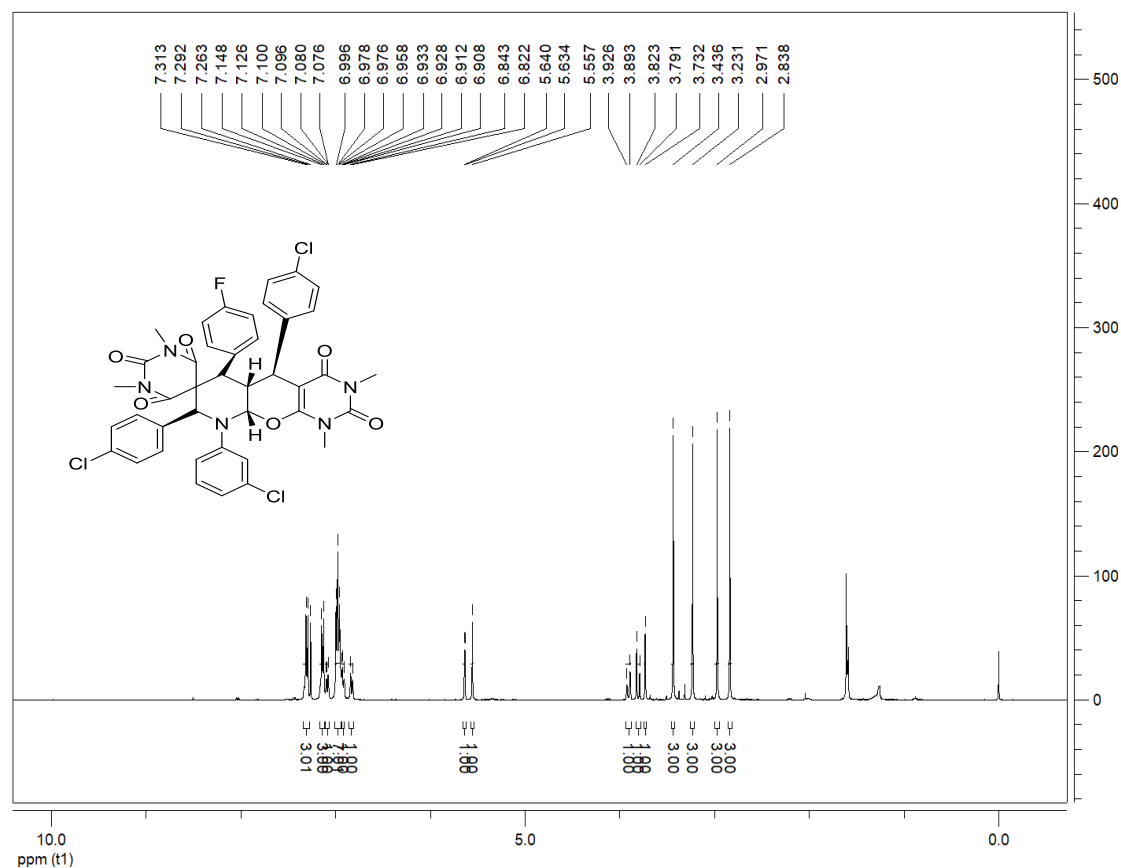

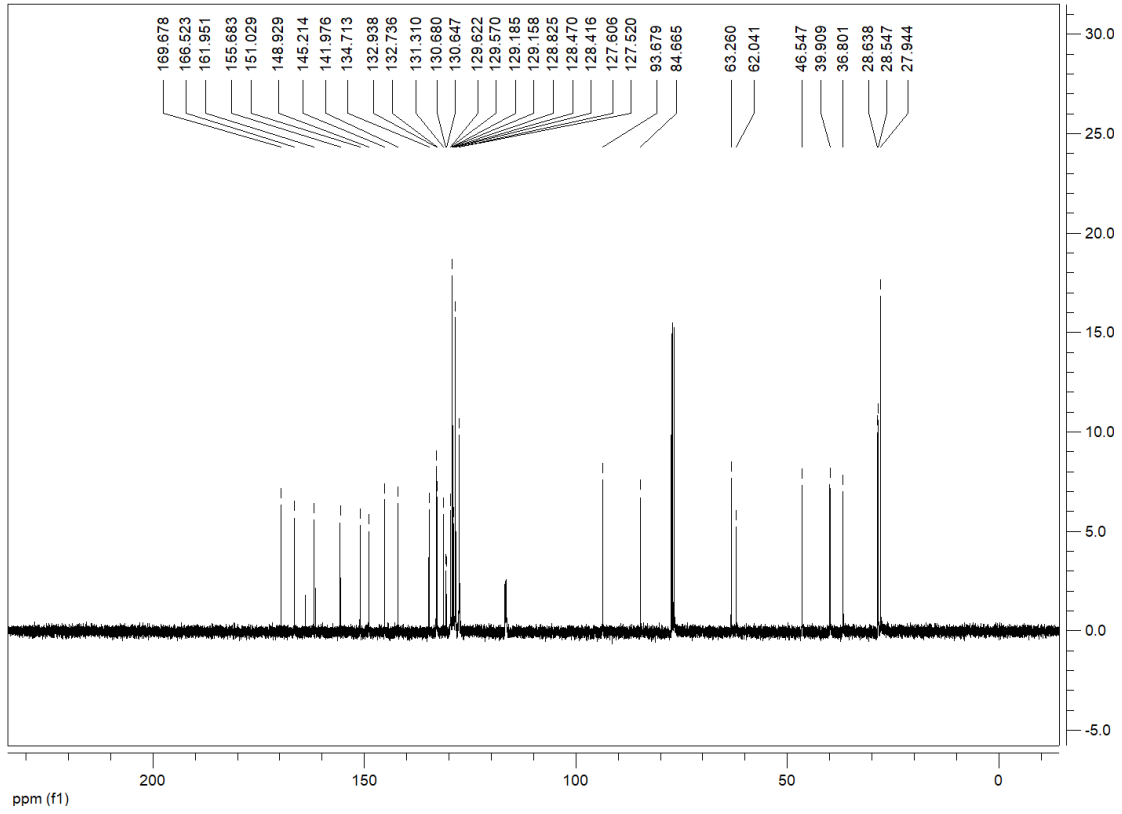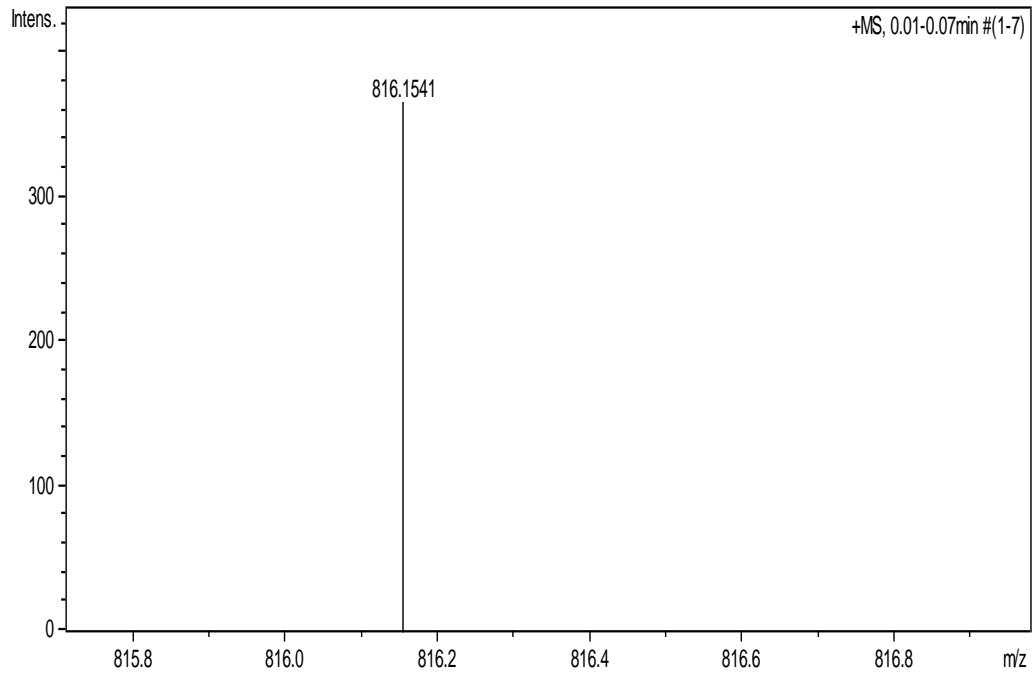



***rel*-(5S,5aS,6S,8R,9aS)-5,8,9-tris(4-chlorophenyl)-6-(4-fluorophenyl)-1,1',3,3'-tetramethyl-1,5,5a,8,9,9a-hexahydro-2H,2'H,6H-spiro[pyrido[3',2':5,6]pyrano[2,3-d]pyrimidine-7,5'-pyrimidine]-2,2',4,4',6'(1'H,3H,3'H)-pentaone (5f):**

white solid, 78%, m.p.190-192 °C; <sup>1</sup>H NMR (400 MHz, CDCl<sub>3</sub>) δ: 7.32-7.30 (m, 3H, ArH), 7.16-7.07 (m, 4H, ArH), 7.04-6.91 (m, 8H, ArH), 6.88-6.84 (m, 1H, ArH), 5.65 (d, *J* = 2.0 Hz, 1H, CH), 5.56 (s, 1H, CH), 3.92 (d, *J* = 12.8 Hz, 1H, CH), 3.81 (d, *J* = 13.2 Hz, 1H, CH), 3.72 (s, 1H, CH), 3.45 (s, 3H, NCH<sub>3</sub>), 3.23 (s, 3H, NCH<sub>3</sub>), 2.97 (s, 3H, NCH<sub>3</sub>), 2.84 (s, 3H, NCH<sub>3</sub>); <sup>13</sup>C NMR (100 MHz, CDCl<sub>3</sub>) δ: 169.6, 166.5, 161.9, 155.6, 151.0, 148.9, 147.9, 141.9, 134.7, 134.6, 133.0, 132.9, 132.6, 130.6, 129.8, 129.6, 129.4, 129.2, 128.8, 128.4, 126.8, 126.2, 124.6, 93.4, 84.7, 63.2, 62.0, 46.5, 39.8, 36.8, 28.6, 28.5, 27.9, 27.9; IR(KBr) ν: 3067, 1688, 1646, 1592, 1482, 1425, 1378, 1276, 1170, 1093, 1016, 915, 830, 765, 673 cm<sup>-1</sup>; MS (*m/z*): HRMS (ESI) Calcd. for C<sub>41</sub>H<sub>34</sub>Cl<sub>3</sub>FN<sub>5</sub>O<sub>6</sub>([M+H]<sup>+</sup>): 816.1559, found: 816.1542.

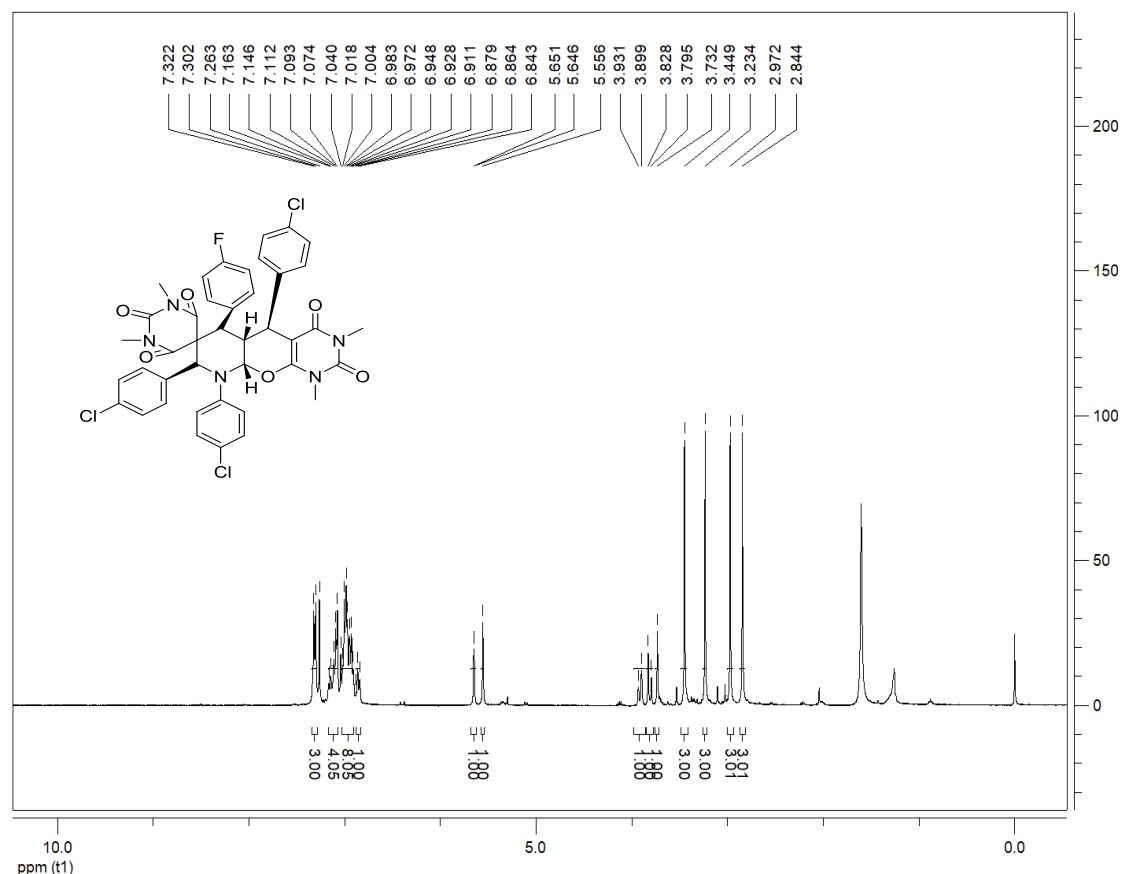

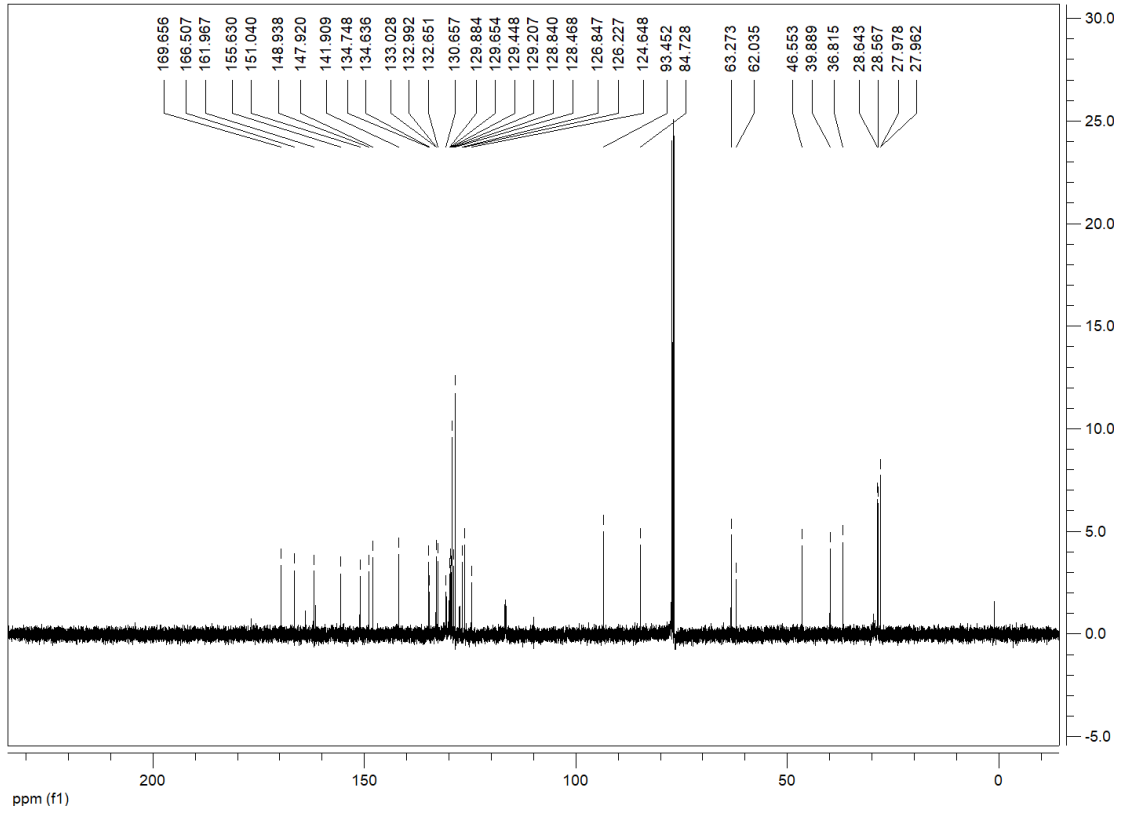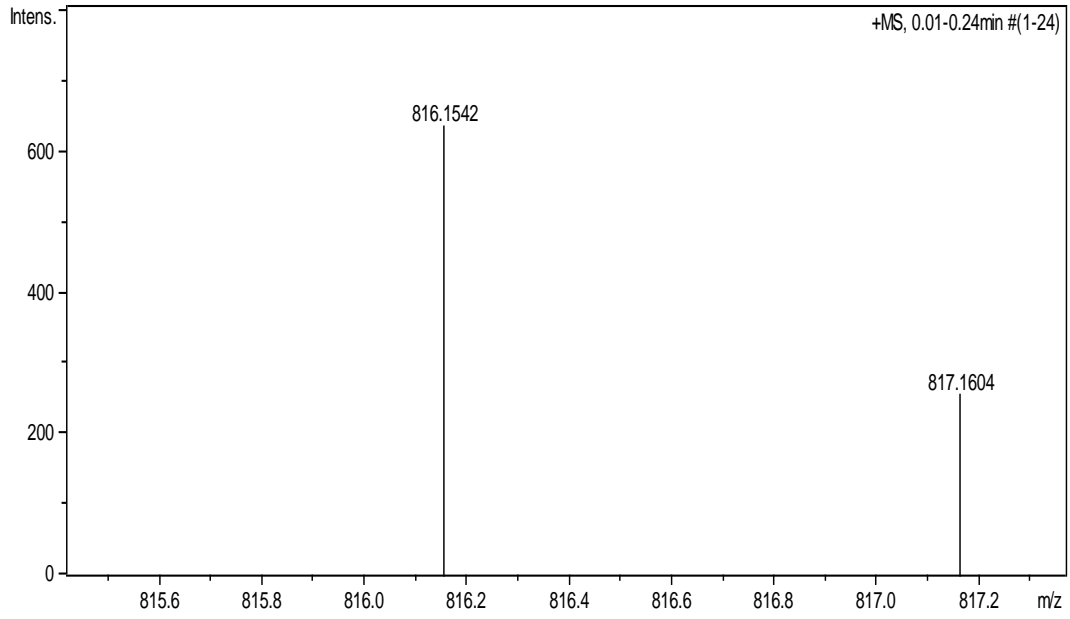

***rel*-(5S,5aS,6S,8R,9aS)-9-(4-bromophenyl)-5,8-bis(4-chlorophenyl)-6-(4-fluorophenyl)-1,1',3,3'-tetramethyl-1,5,5a,8,9,9a-hexahydro-2H,2'H,6H-spiro[pyrido[3',2':5,6]pyrano[2,3-d]pyrimidine-7,5'-pyrimidine]-2,2',4,4',6'-pentaone (5g):**

white solid, 81%, m.p.195-197°C; <sup>1</sup>H NMR (400 MHz, CDCl<sub>3</sub>) δ: 7.31-7.28 (m, 5H, ArH), 7.16 (m, 1H, ArH), 7.10-7.08 (m, 1H, ArH), 6.99-6.90 (m, 8H, ArH), 6.84-6.81 (m, 1H, ArH), 5.64 (d, *J* = 2.0 Hz, 1H, CH), 5.55 (s, 1H, CH), 3.92-3.89 (m, 1H, CH), 3.80 (d, *J* = 12.8 Hz, 1H, CH), 3.73 (s, 1H, CH), 3.43 (s, 3H, NCH<sub>3</sub>), 3.23 (s, 3H, NCH<sub>3</sub>), 2.97 (s, 3H, NCH<sub>3</sub>), 2.84 (s, 3H, NCH<sub>3</sub>); <sup>13</sup>C NMR (100 MHz, CDCl<sub>3</sub>) δ: 169.6, 166.5, 161.9, 155.6, 151.0, 148.9, 145.7, 141.9, 134.7, 132.9, 132.7, 132.1, 130.6, 130.6, 129.6, 129.5, 129.1, 128.8, 128.4, 128.4, 127.9, 119.2, 93.5, 84.6, 63.1, 62.0, 46.5, 39.8, 36.7, 28.6, 28.5, 27.9; IR(KBr) ν: 2957, 1651, 1482, 1377, 1273, 1235, 1170, 1097, 1015, 910, 831, 759, 668 cm<sup>-1</sup>; MS (*m/z*): HRMS (ESI) Calcd. for C<sub>41</sub>H<sub>34</sub>BrCl<sub>2</sub>FN<sub>5</sub>O<sub>6</sub> ([M+H]<sup>+</sup>): 860.1054, found: 860.1034.

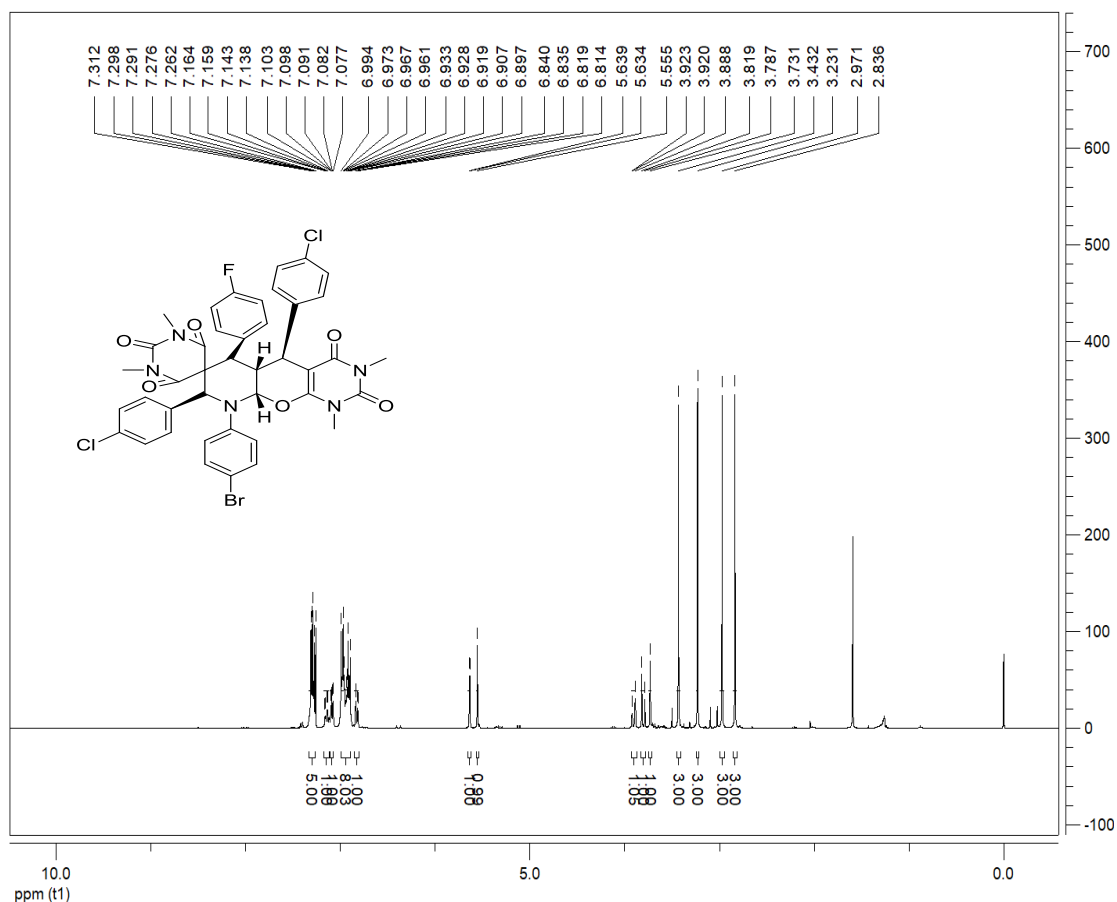

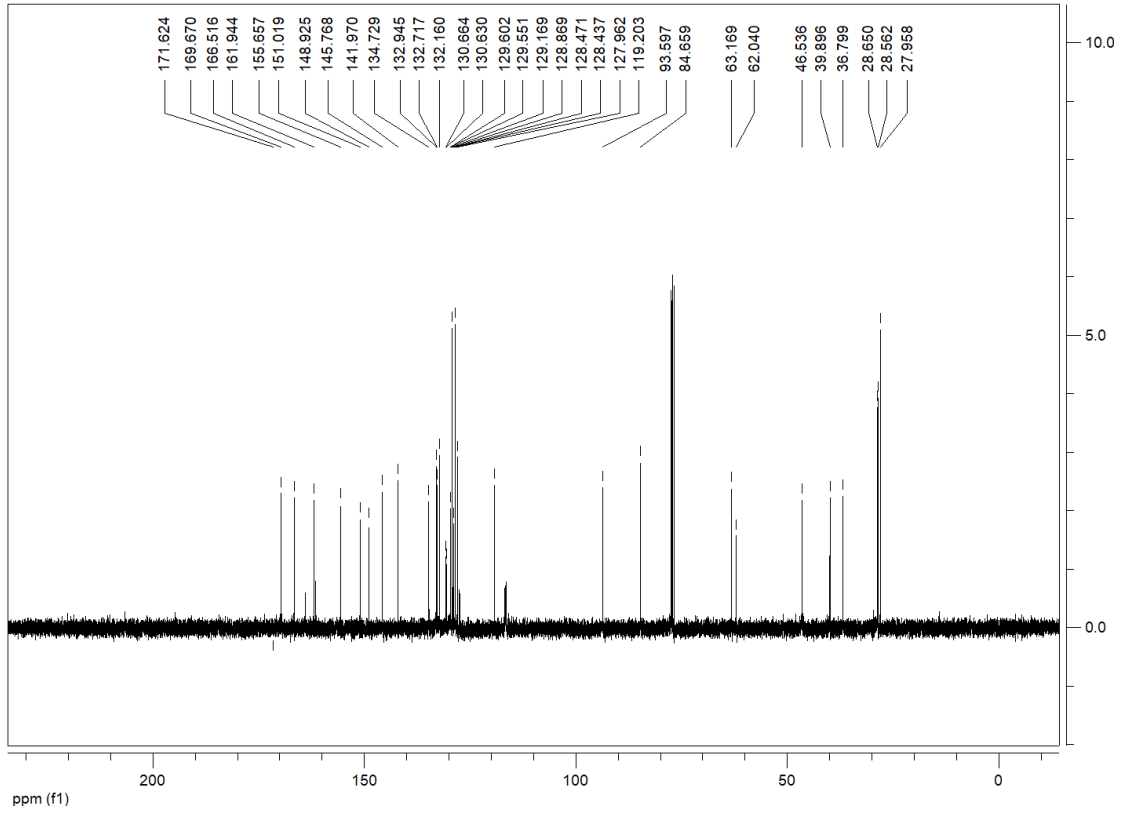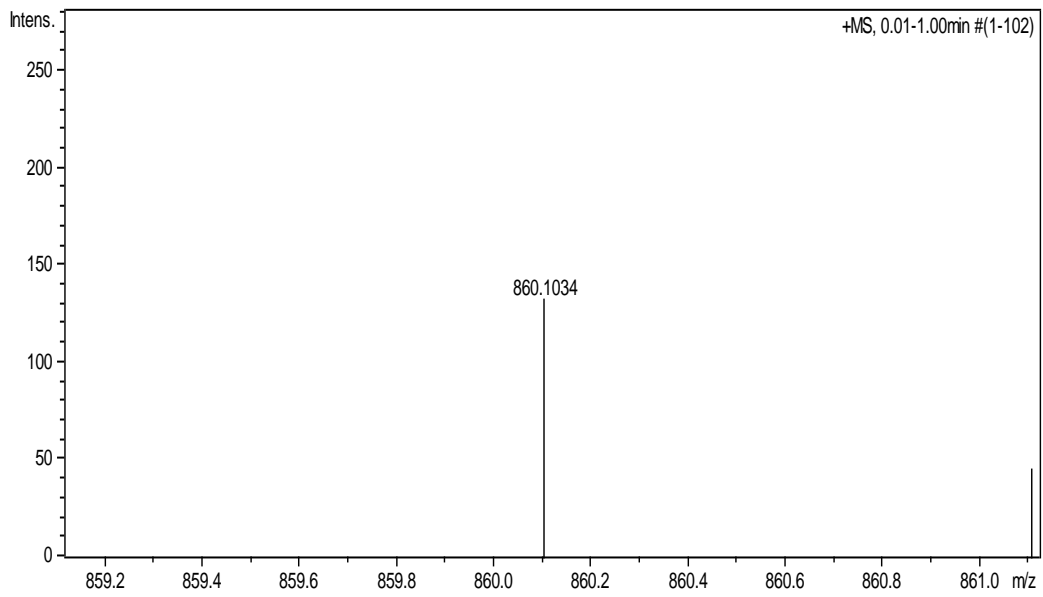

***rel*-(5*S*,5*aS*,6*S*,8*R*,9*aS*)-5,8-bis(3-chlorophenyl)-6-(4-fluorophenyl)-1,1',3,3'-tetramethyl-9-(p-tolyl)-1,5,5*a*,8,9,9*a*-hexahydro-2*H*,2'*H*,6*H*-spiro[pyrido[3',2':5,6]pyrano[2,3-*d*]pyrimidine-7,5'-pyrimidine]-2,2',4,4',6'-pentaone (5h):**

white solid, 84%, m.p.148-150°C; <sup>1</sup>H NMR (400 MHz, CDCl<sub>3</sub>) δ: 7.36 (brs, 1H, ArH), 7.26-7.23 (m, 2H, ArH), 7.15 (s, 1H, ArH), 7.03-6.91 (m, 11H, ArH), 6.86-6.79 (m, 1H, ArH), 5.67-6.66 (m, 1H, CH), 5.53 (d, *J* = 14.0 Hz, 1H, CH), 4.04-3.96 (m, 1H, CH), 3.87-3.82 (m, 1H, CH), 3.73 (s, 1H, CH), 3.47 (s, 3H, NCH<sub>3</sub>), 3.24 (s, 3H, NCH<sub>3</sub>), 3.02-2.81 (s, s, s, s, 6H, 2NCH<sub>3</sub>); <sup>13</sup>C NMR (100 MHz, CDCl<sub>3</sub>) δ: 169.7, 169.6, 166.6, 166.5, 163.9, 162.0, 161.4, 156.0, 151.1, 149.0, 145.6, 145.6, 143.9, 143.7, 136.7, 136.6, 135.7, 135.5, 134.7, 134.6, 133.8, 133.1, 133.1, 130.9, 130.9, 130.2, 129.6, 129.4, 129.2, 128.9, 128.6, 128.4, 128.2, 127.8, 127.7, 127.7, 127.7, 127.3, 127.2, 127.2, 126.3, 126.2, 126.1, 125.4, 125.4, 125.4, 116.5, 116.5, 116.3, 94.1, 94.0, 84.3, 64.0, 63.9, 62.2, 46.1, 46.0, 39.9, 39.9, 39.9, 37.1, 28.7, 28.5, 27.9, 27.9, 27.8, 20.8; IR(KBr) ν: 3061, 1685, 1650, 1476, 1431, 1381, 1273, 1171, 902, 841, 782, 700 cm<sup>-1</sup>; MS (*m/z*): HRMS (ESI) Calcd. for C<sub>42</sub>H<sub>37</sub>Cl<sub>2</sub>FN<sub>5</sub>O<sub>6</sub> ([M+H]<sup>+</sup>): 796.2105, found: 796.2097.

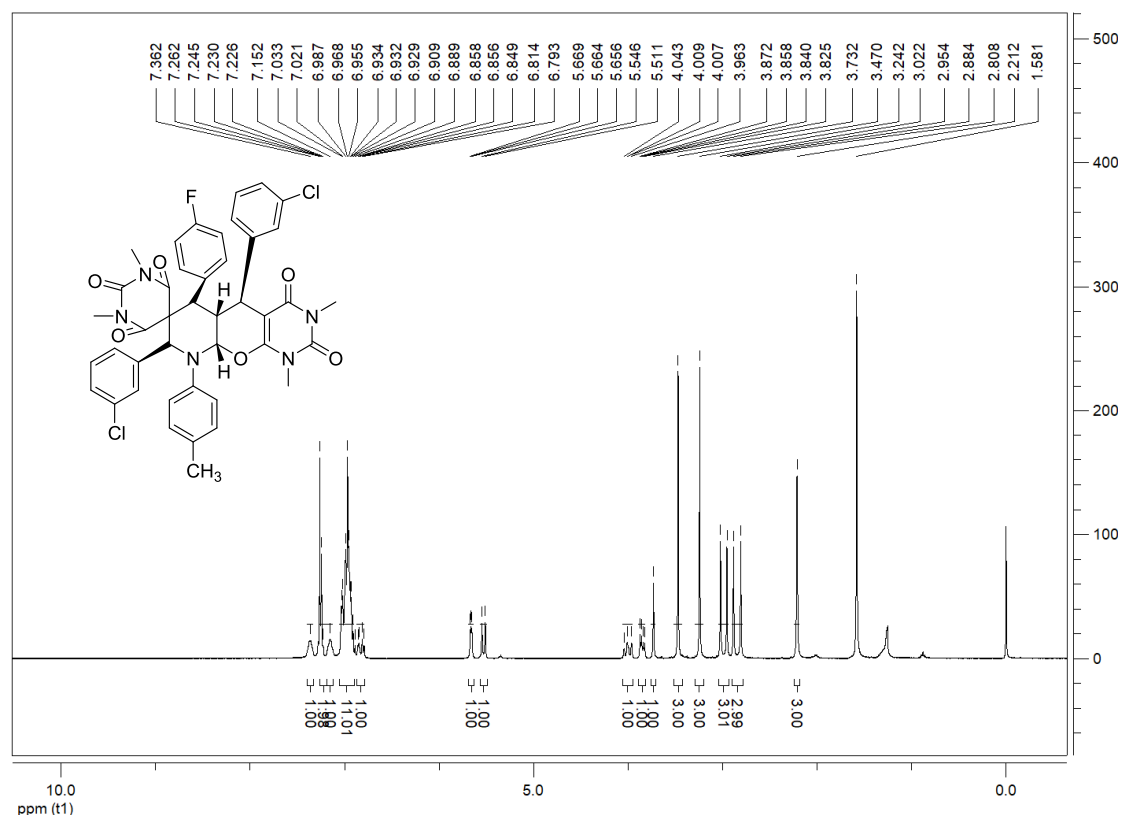

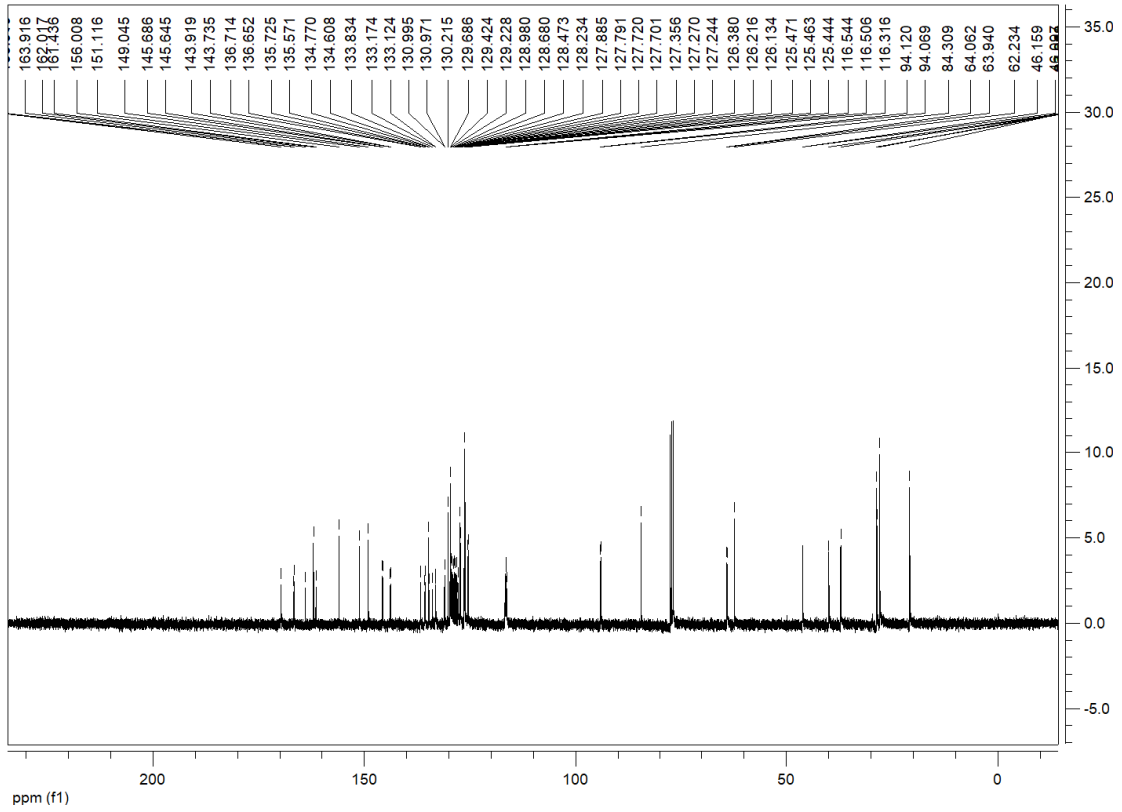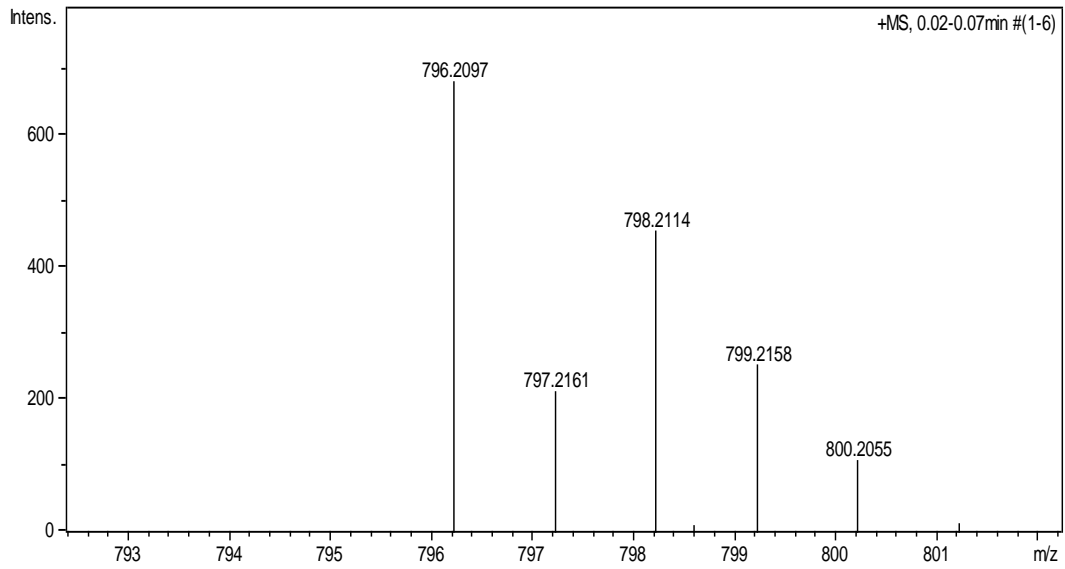



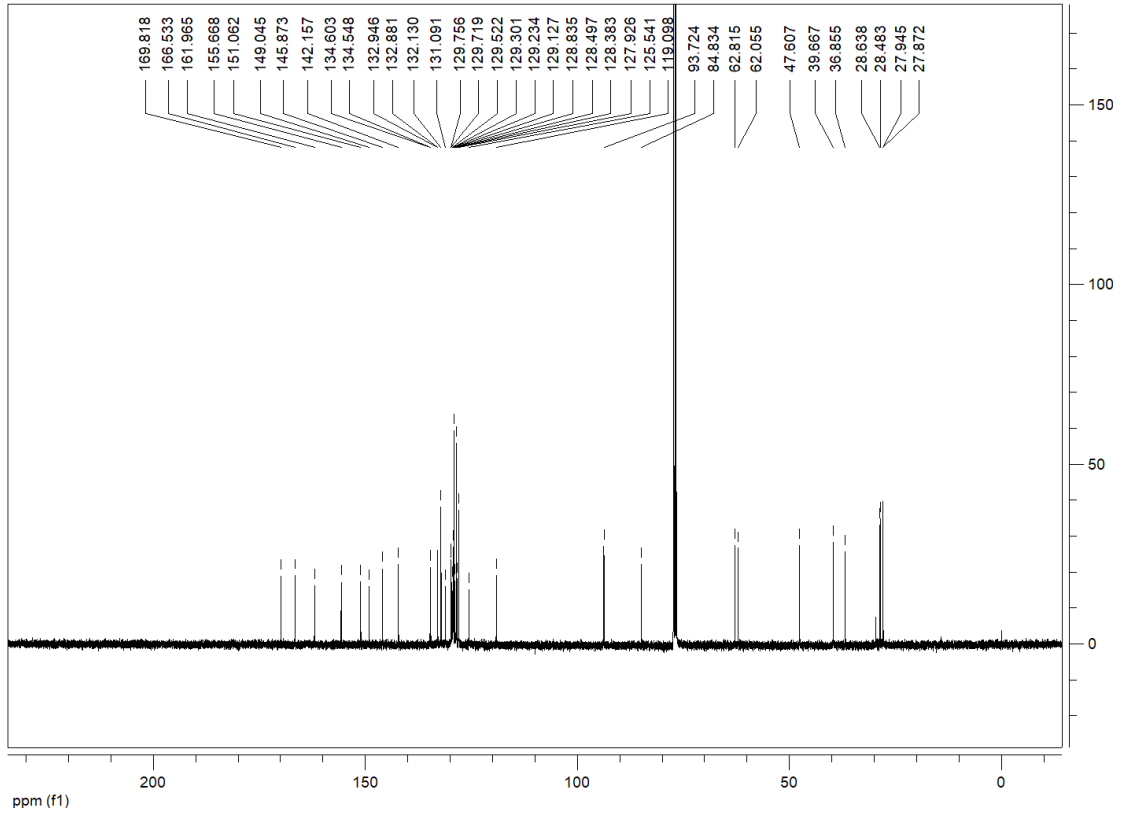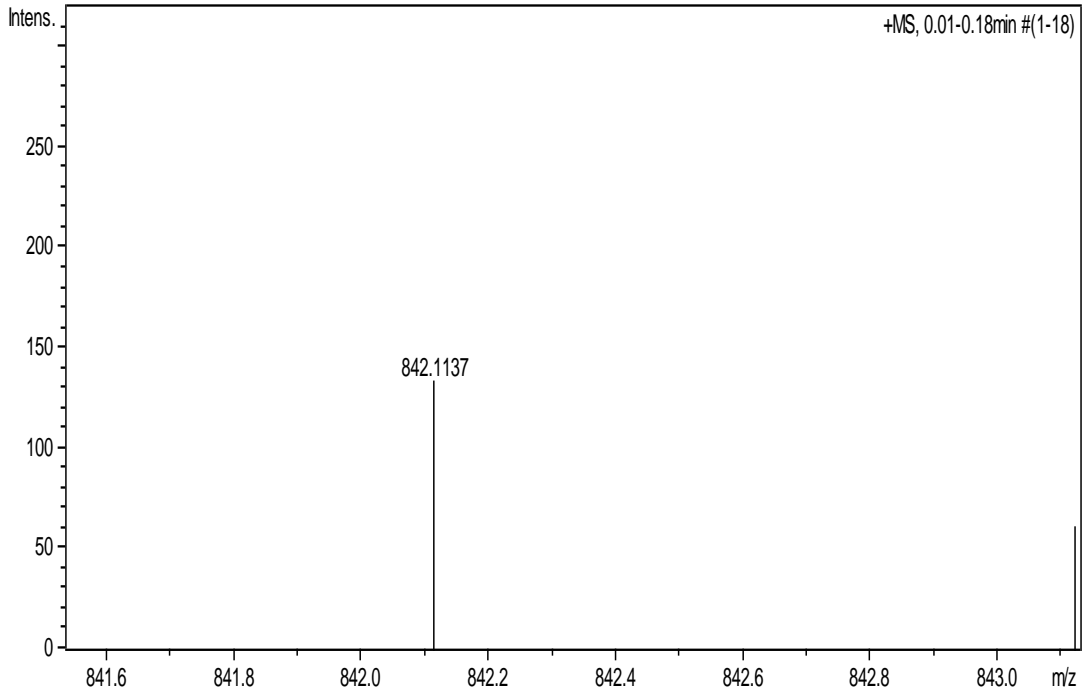





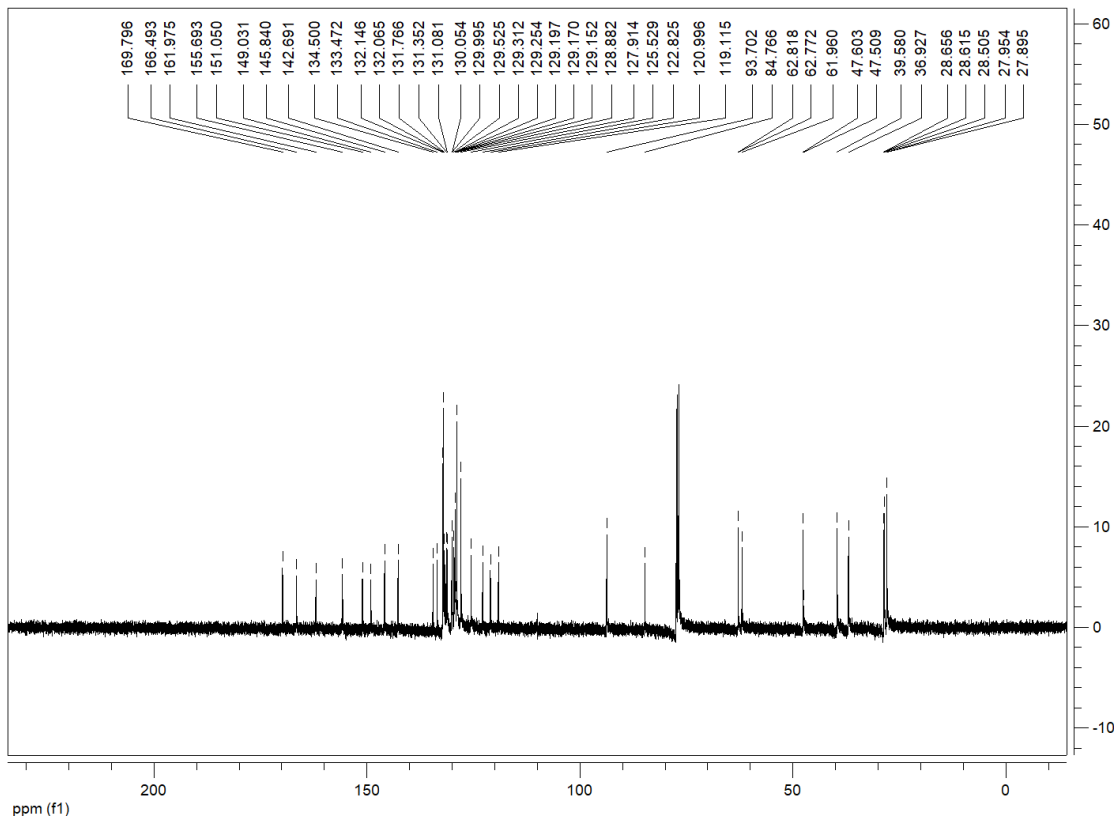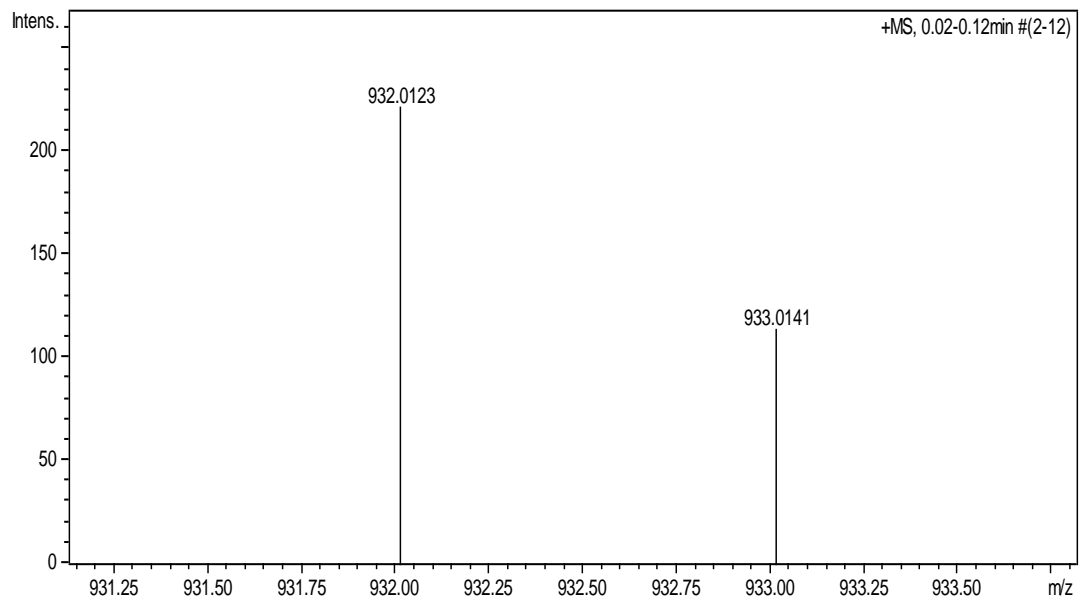

Supplement: c8qo00784e1.pdf [file c8qo00784e1.pdf]
